# Supplementary material
Source: PubMed Central journal article supplement (PMC6863494)

### African buffalo (RECENT)

Dataset

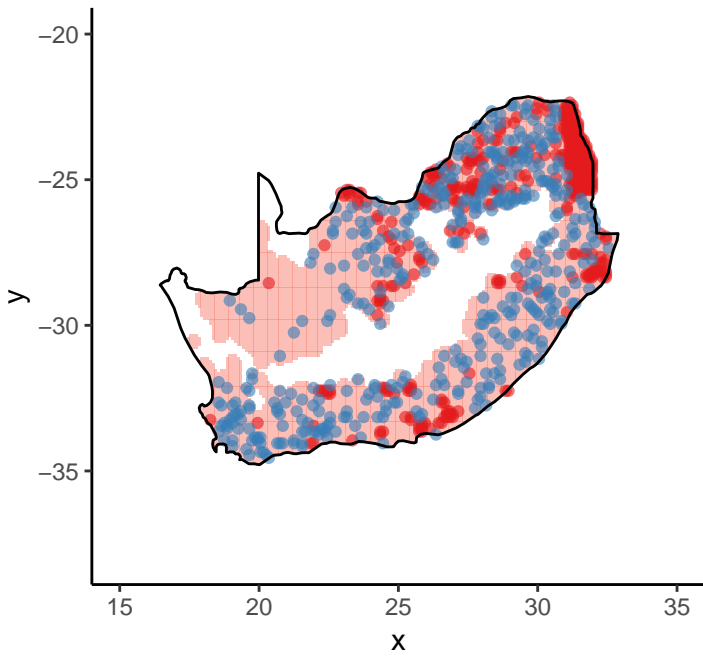

### African buffalo (TOTAL)

Dataset

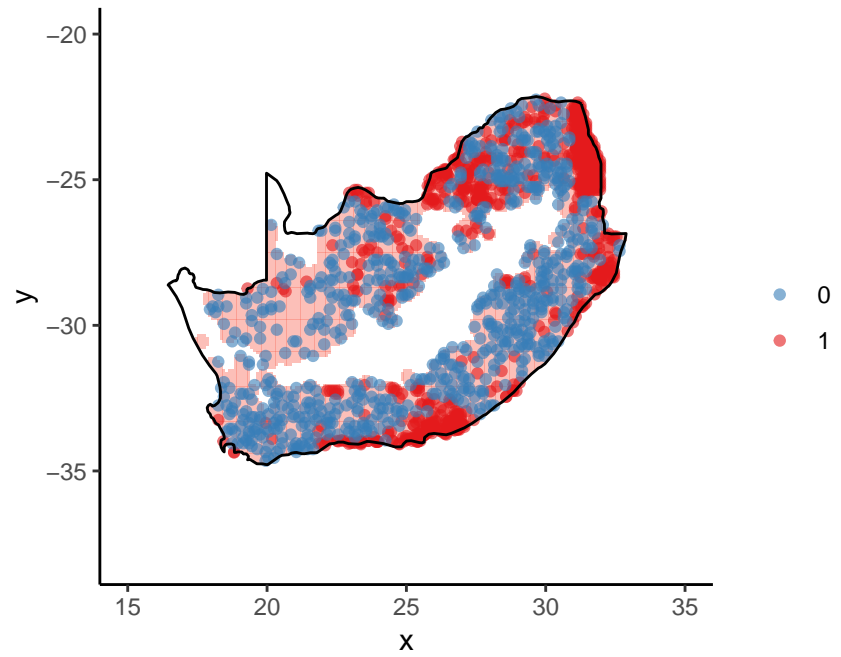

### Habitat suitability

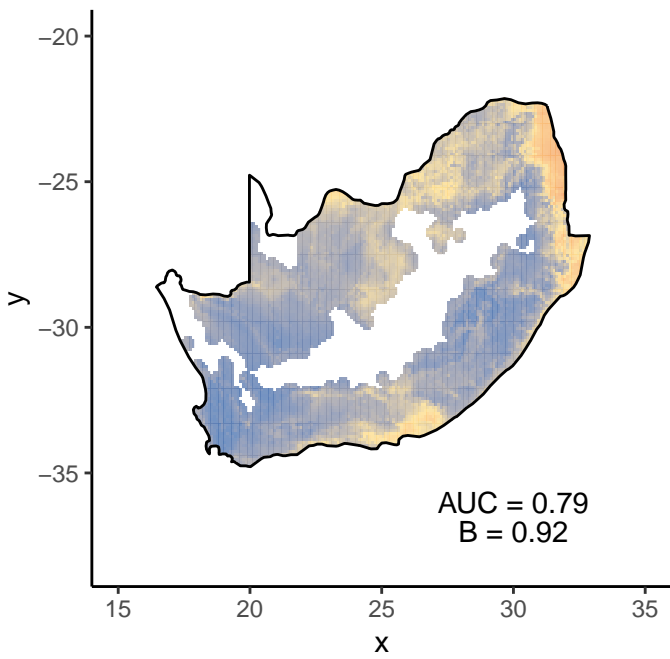

### Habitat suitability

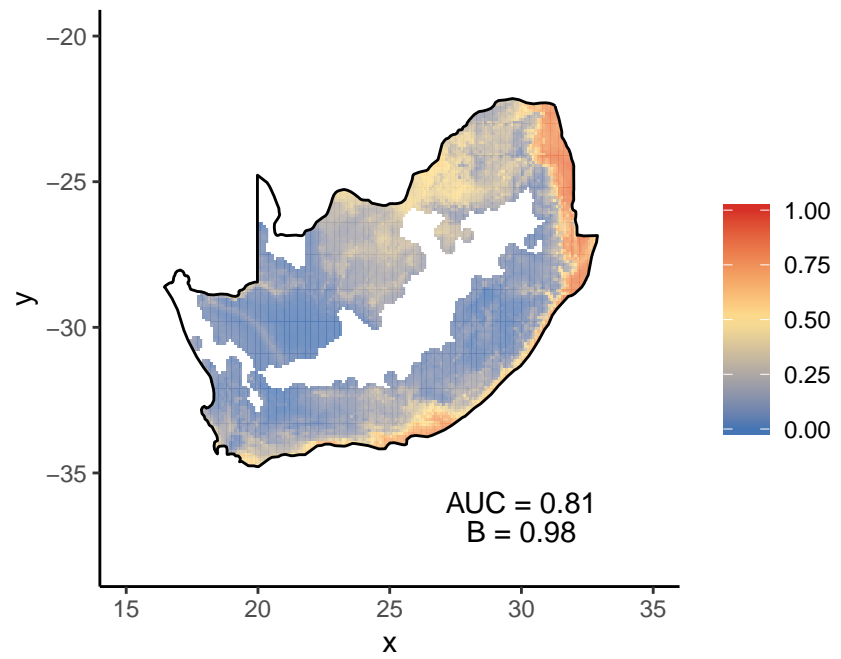

### Uncertainty

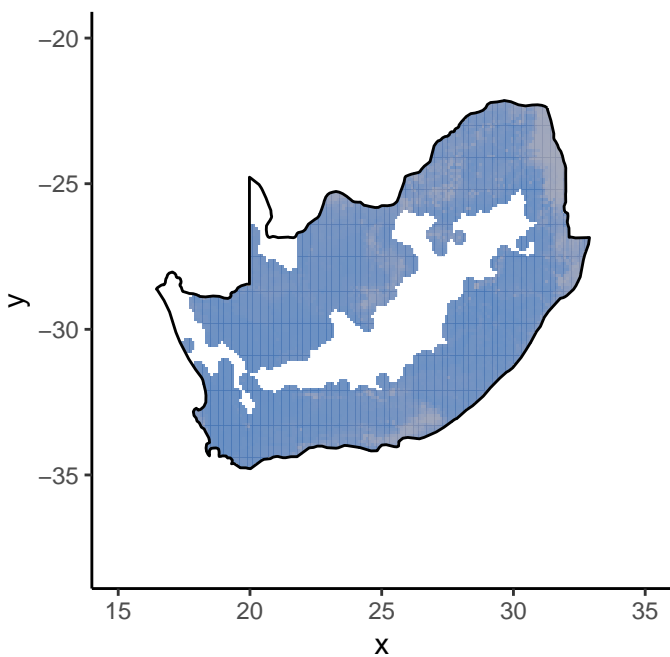

### Uncertainty

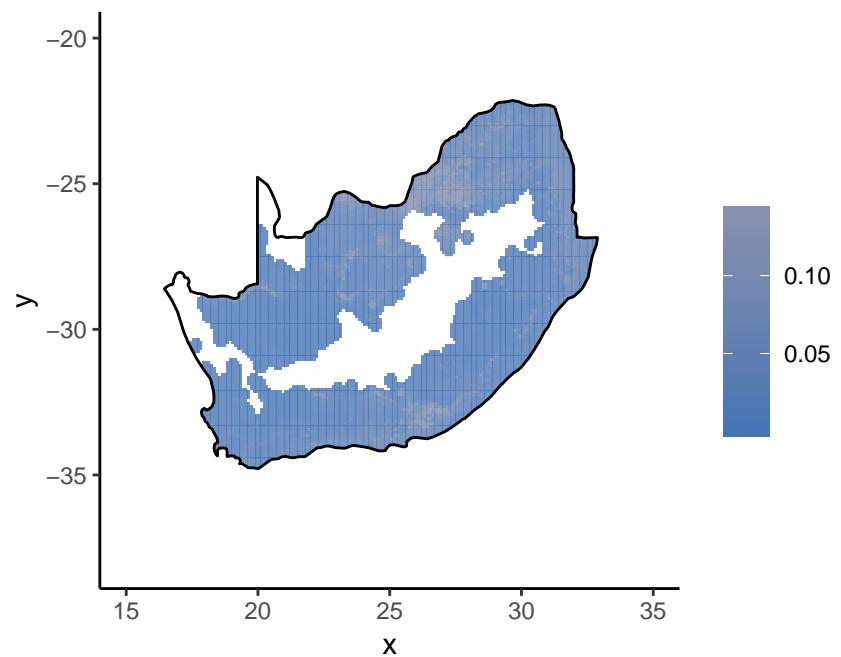

### African elephant (RECENT)

Dataset

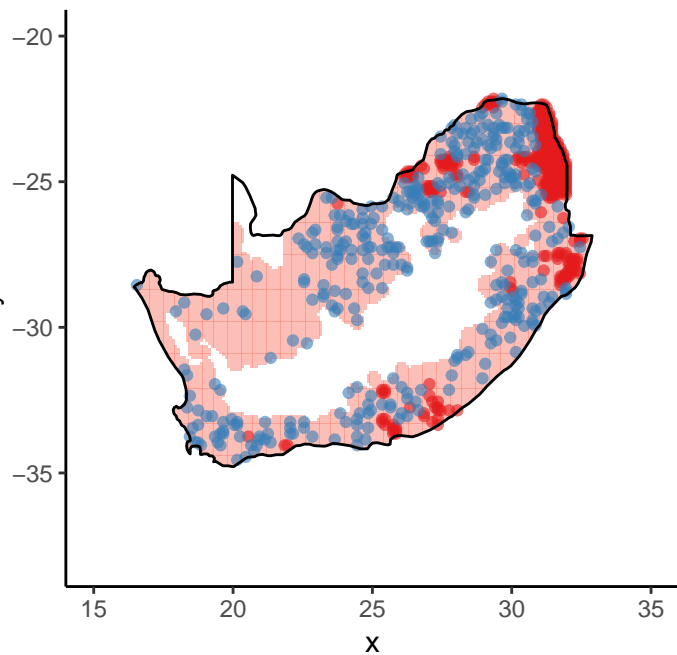

### African elephant (TOTAL)

Dataset

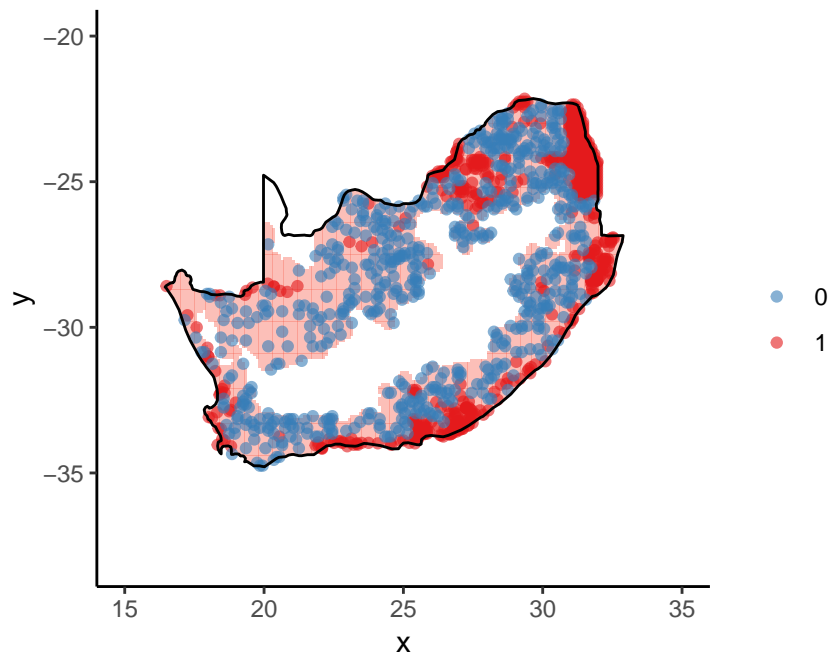

### Habitat suitability

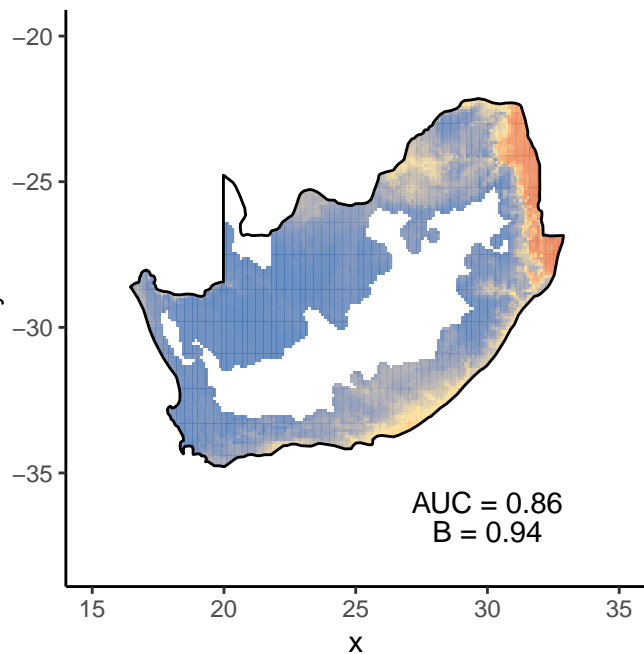

### Habitat suitability

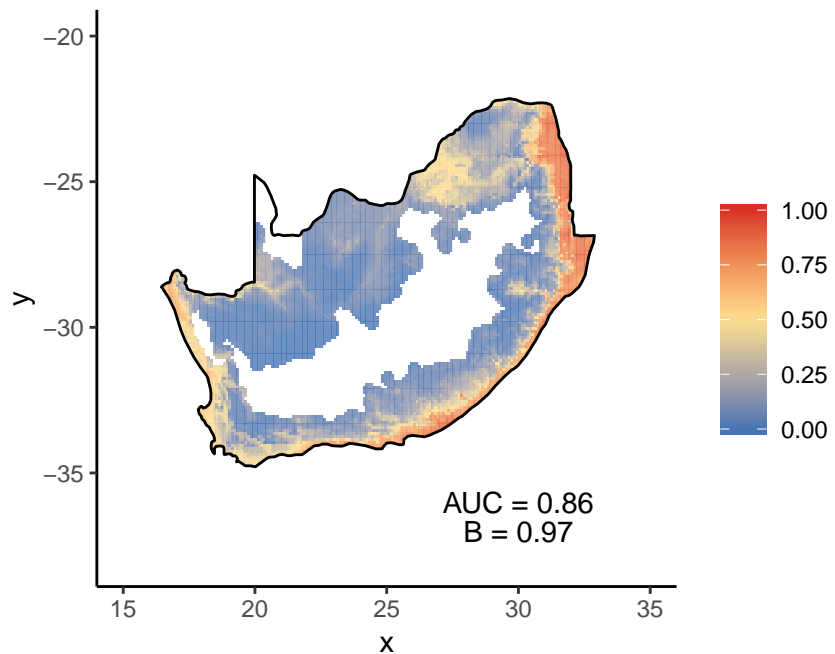

### Uncertainty

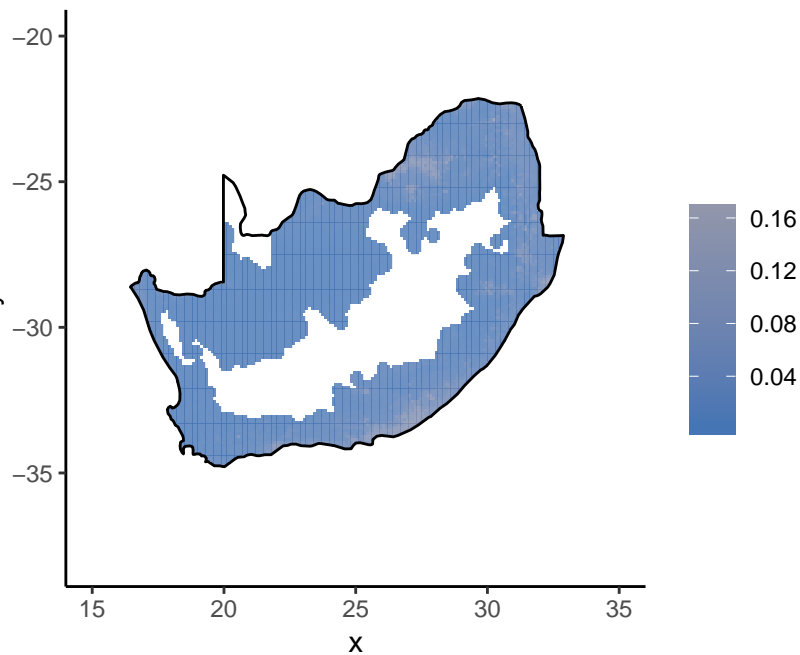

### Uncertainty

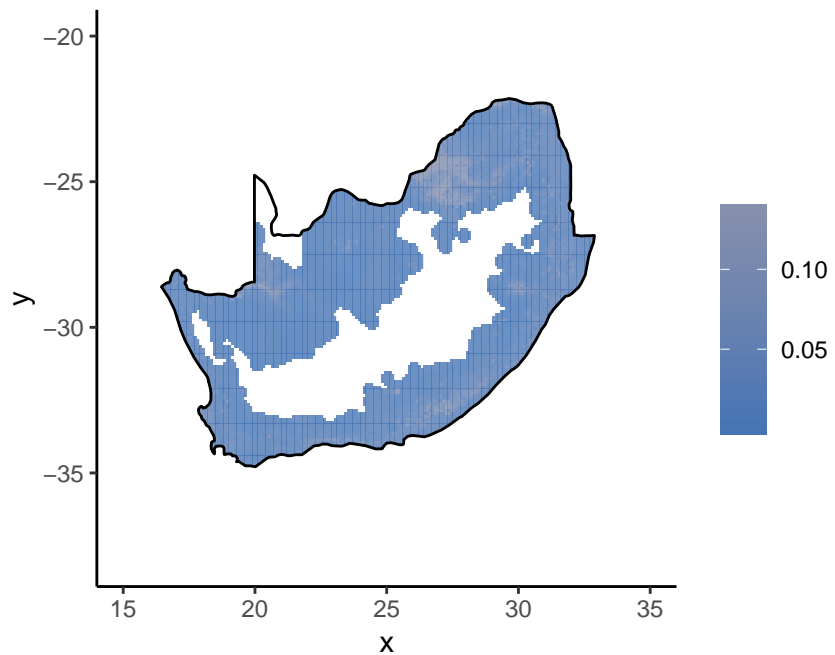

### African wild dog (RECENT)

Dataset

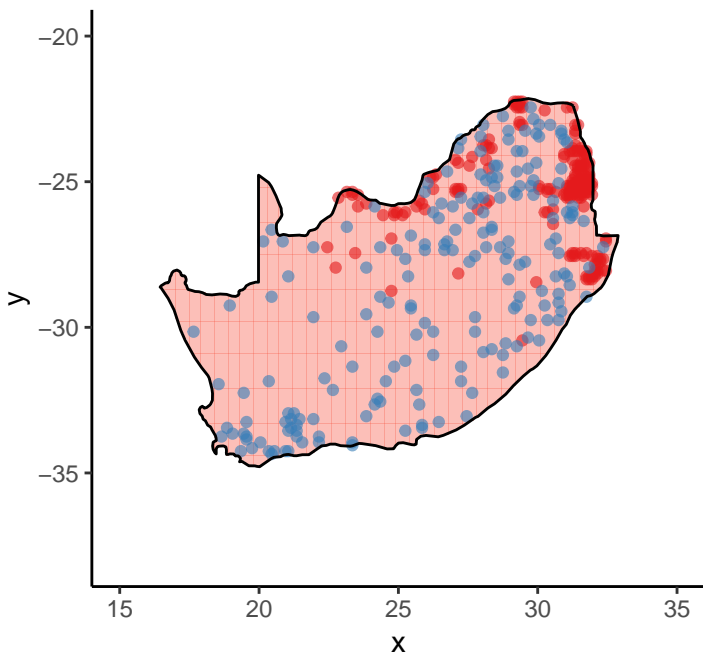

### African wild dog (TOTAL)

Dataset

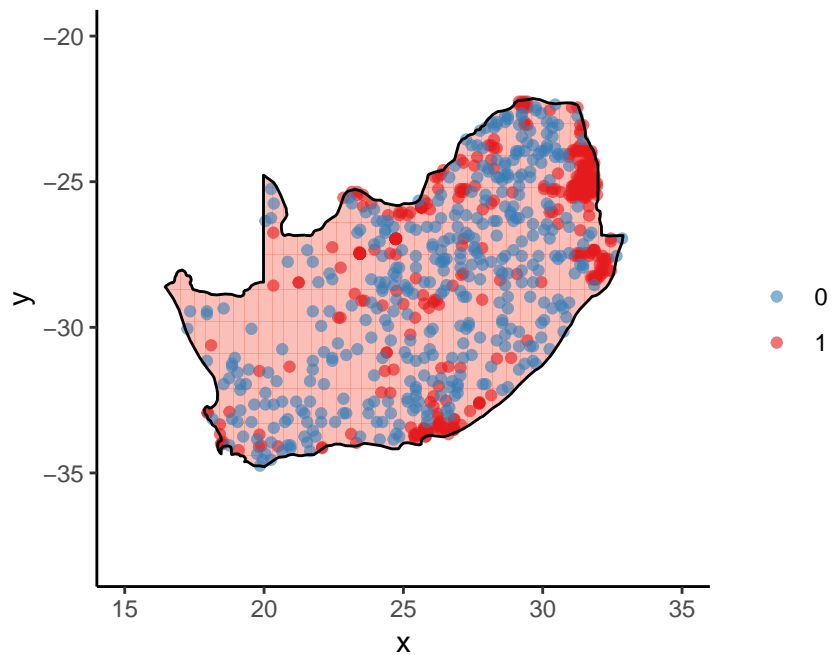

### Habitat suitability

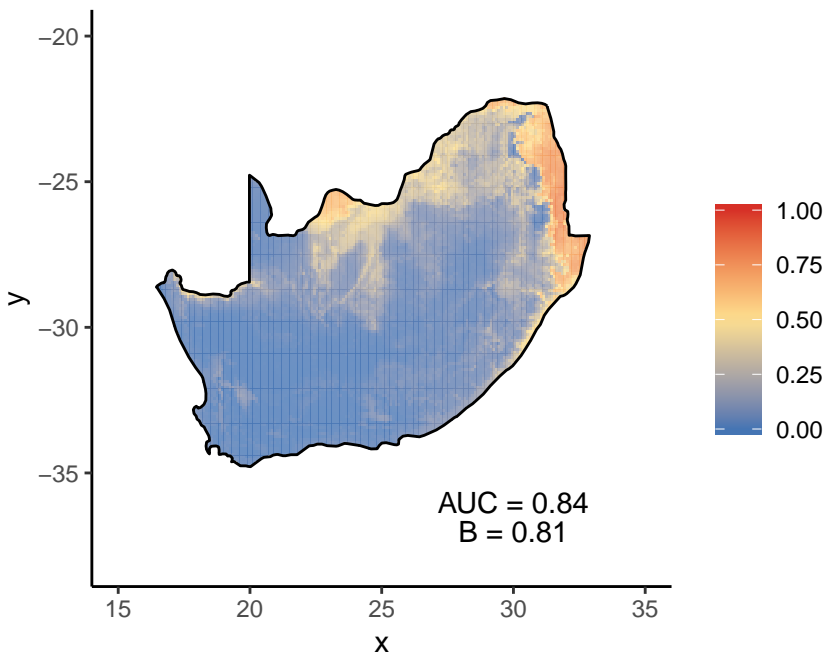

### Habitat suitability

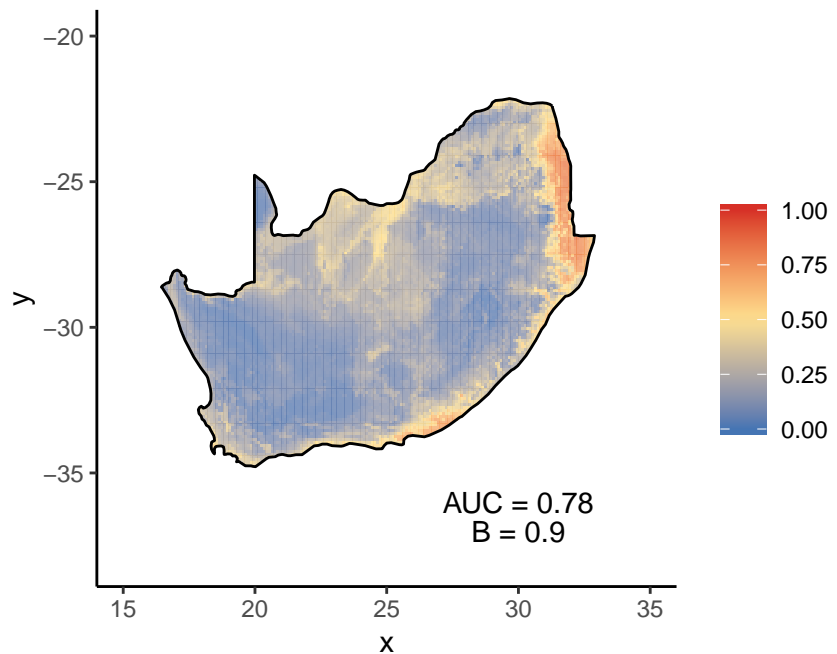

### Uncertainty

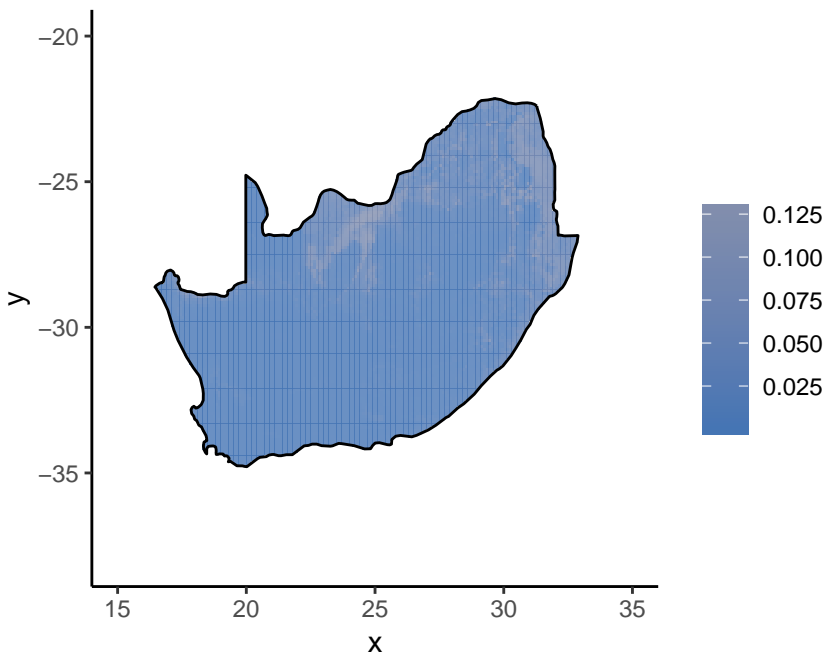

### Uncertainty

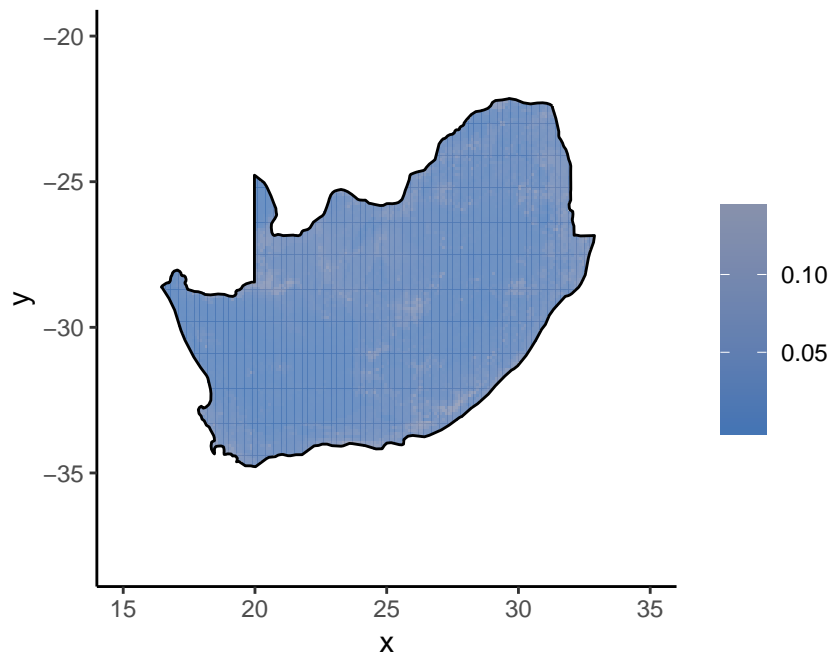

### Black wildebeest (RECENT)

Dataset

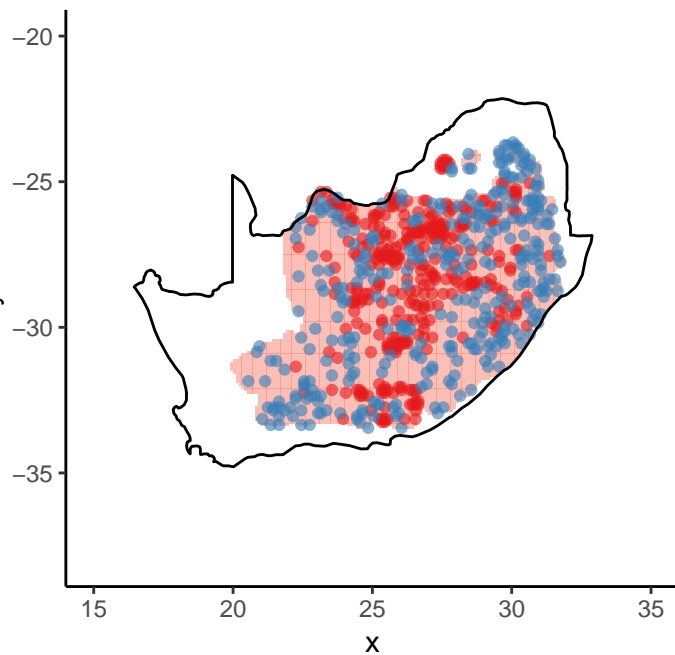

### Black wildebeest (TOTAL)

Dataset

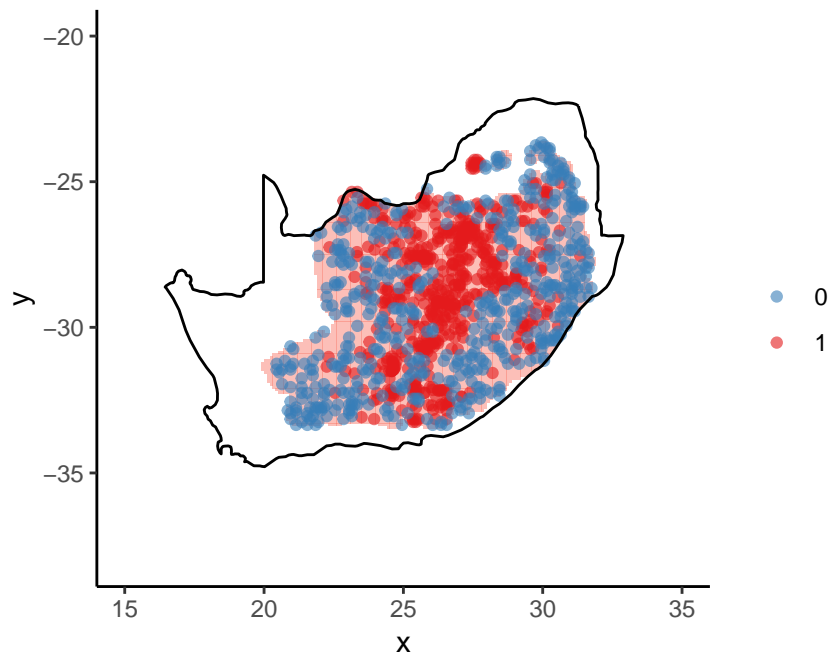

### Habitat suitability

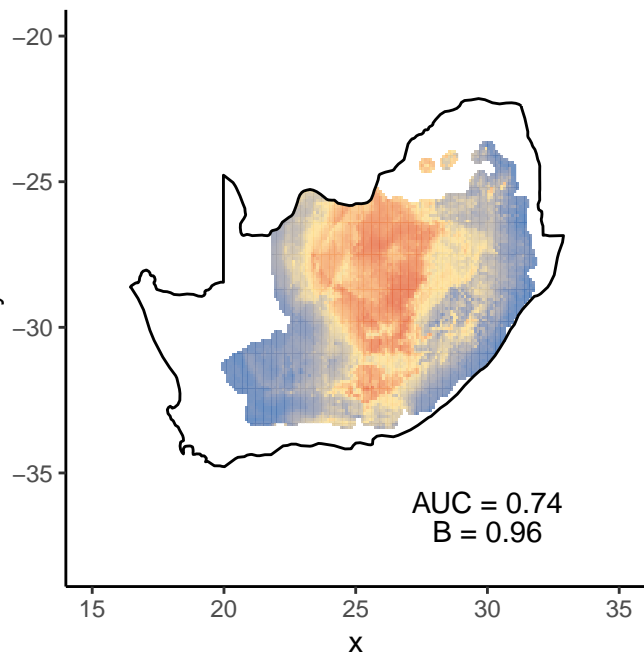

### Habitat suitability

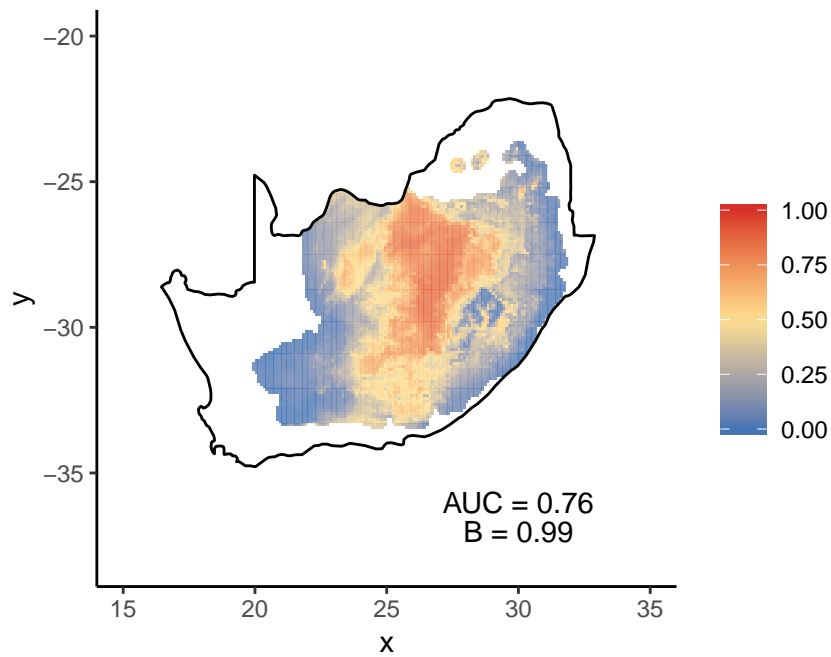

### Uncertainty

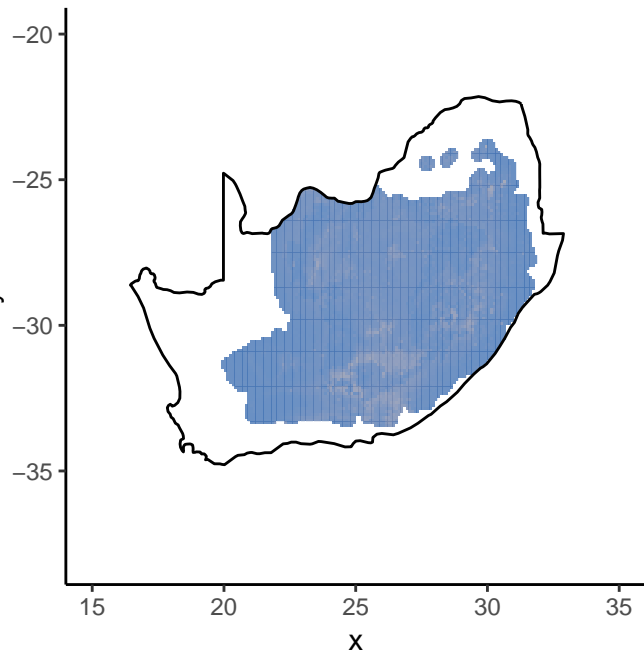

### Uncertainty

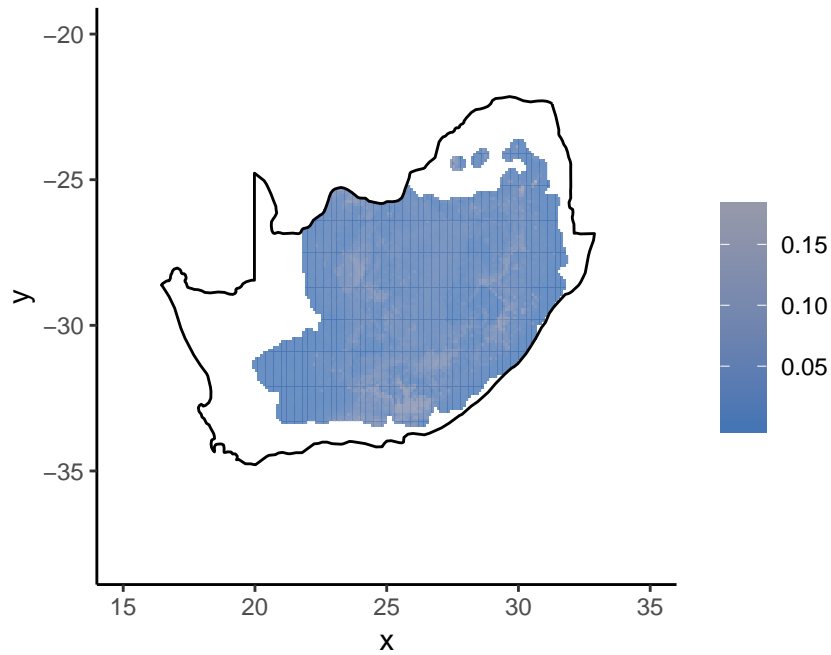

### Blesbok (RECENT)

Dataset

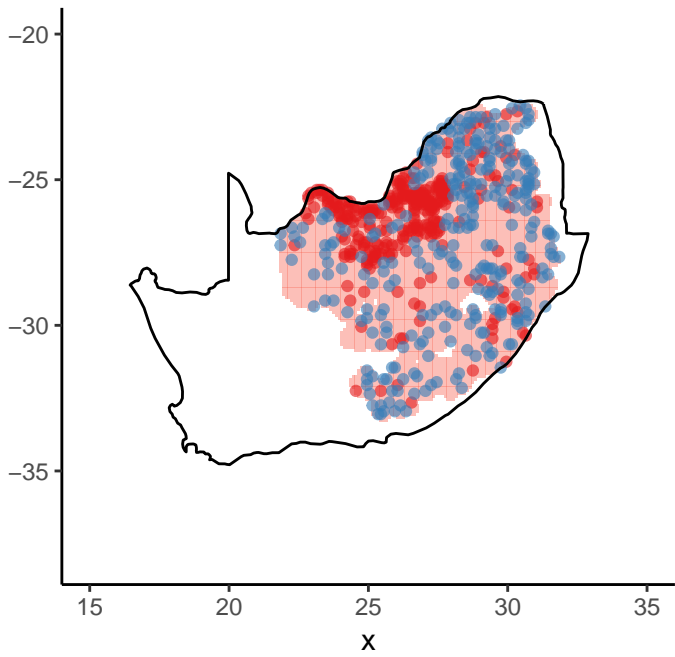

### Blesbok (TOTAL)

Dataset

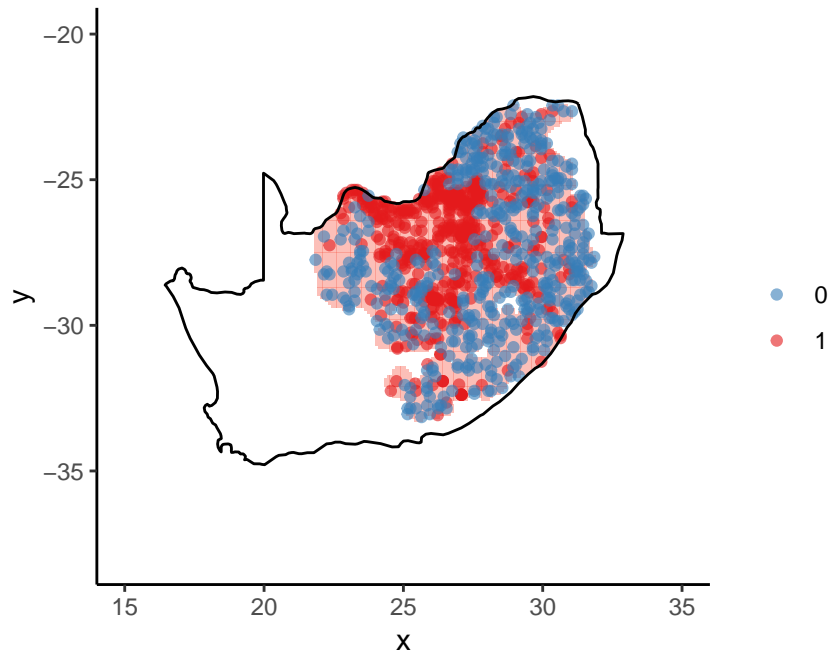

### Habitat suitability

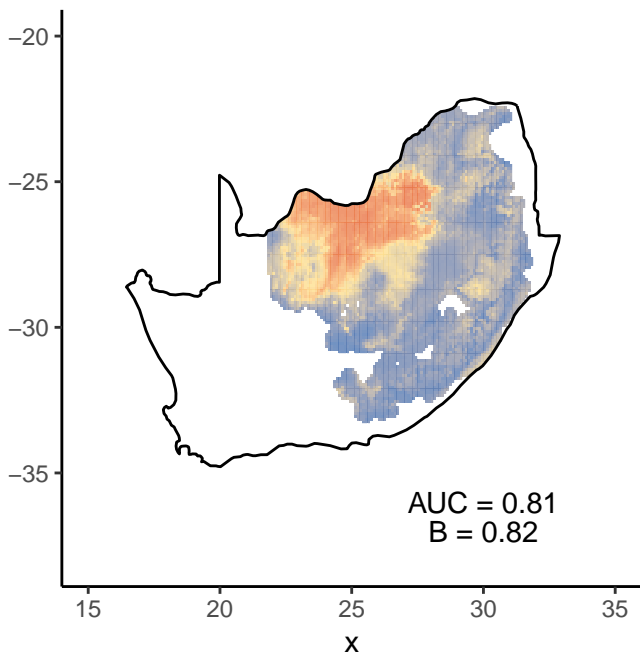

### Habitat suitability

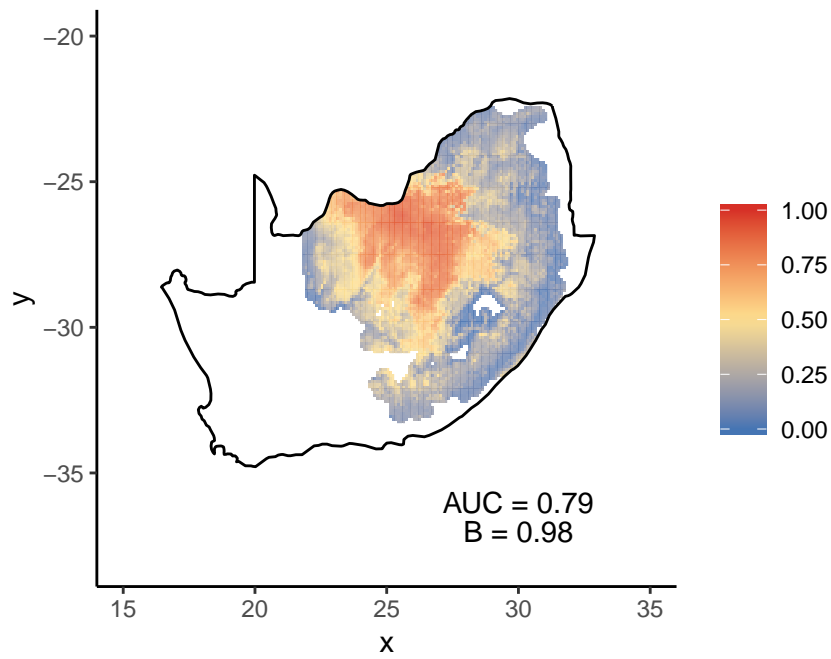

### Uncertainty

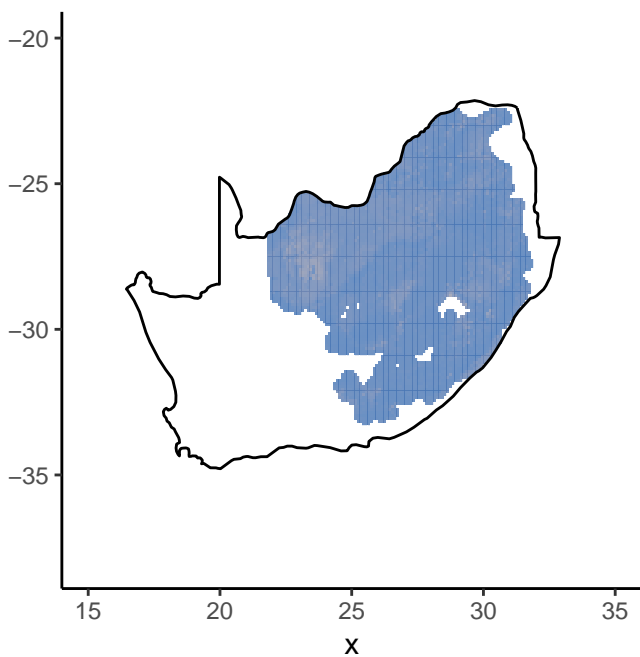

### Uncertainty

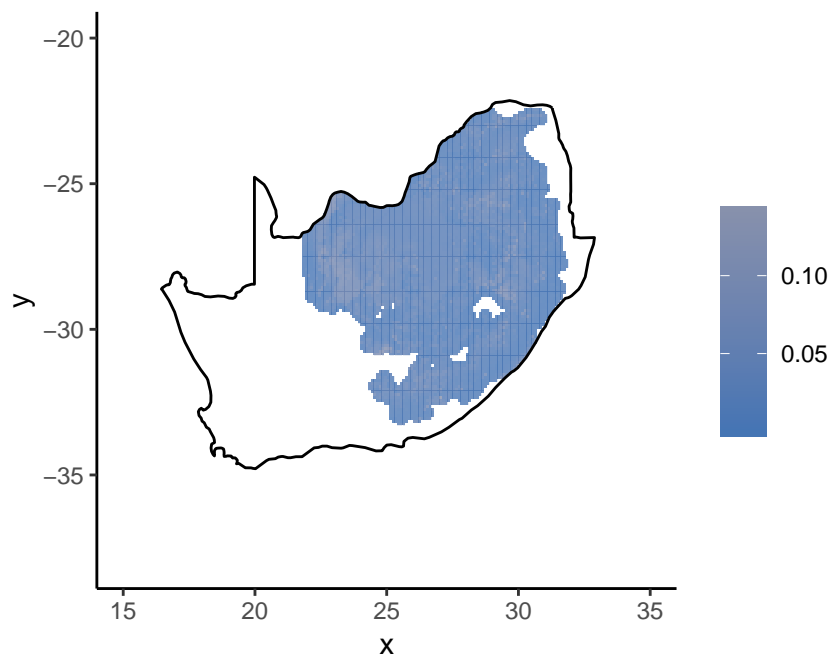

### Blue wildebeest (RECENT)

Dataset

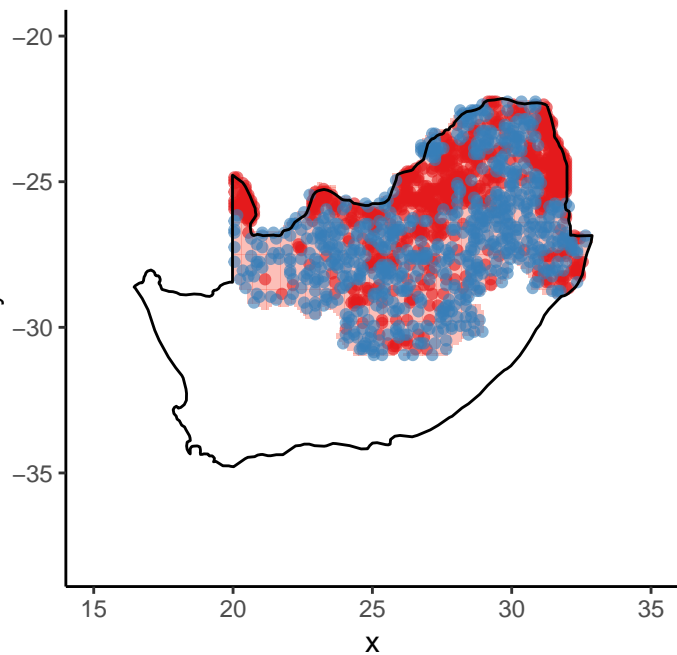

### Blue wildebeest (TOTAL)

Dataset

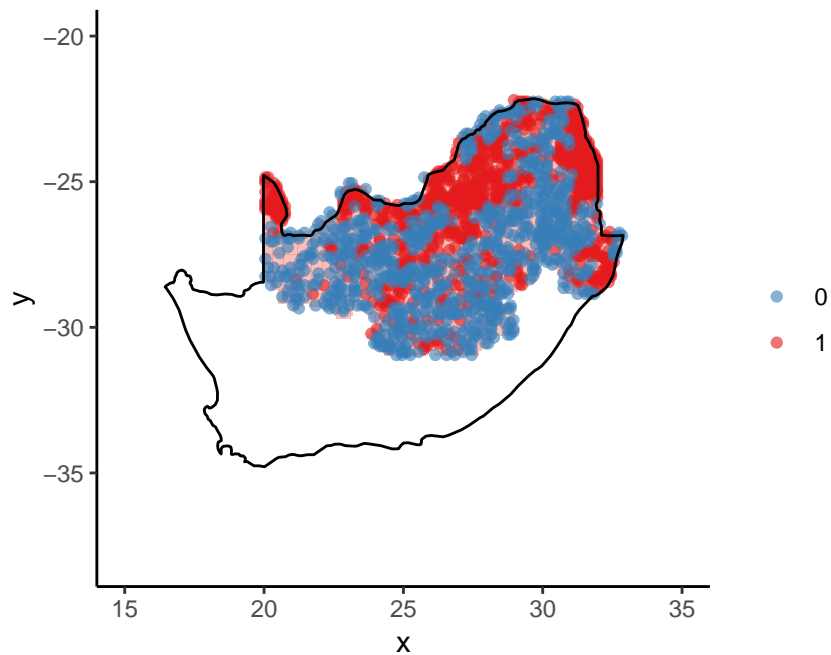

### Habitat suitability

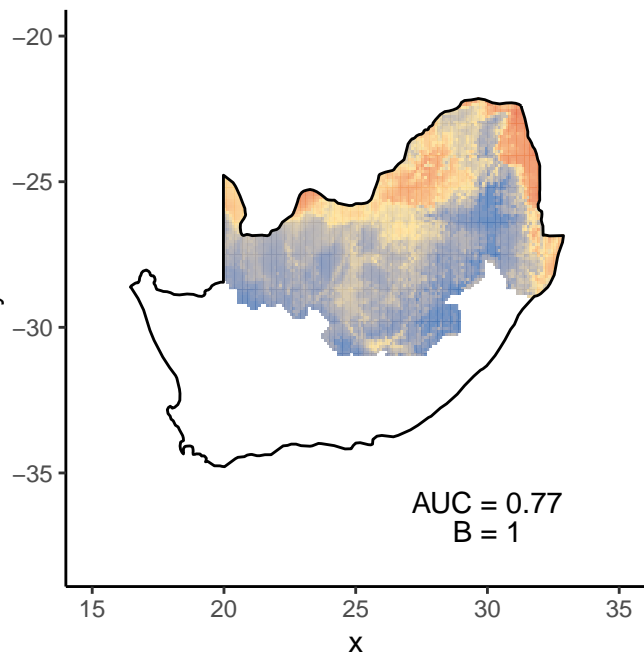

### Habitat suitability

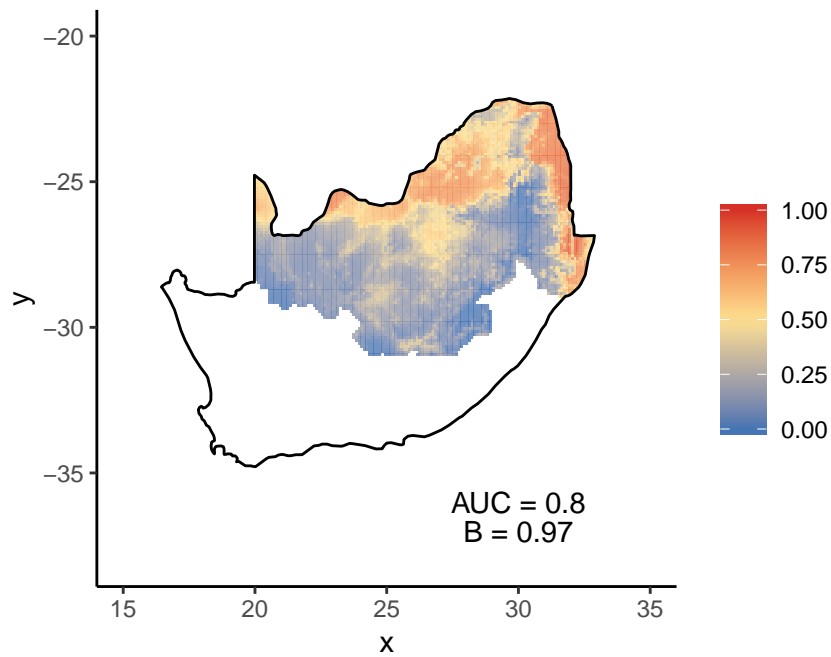

### Uncertainty

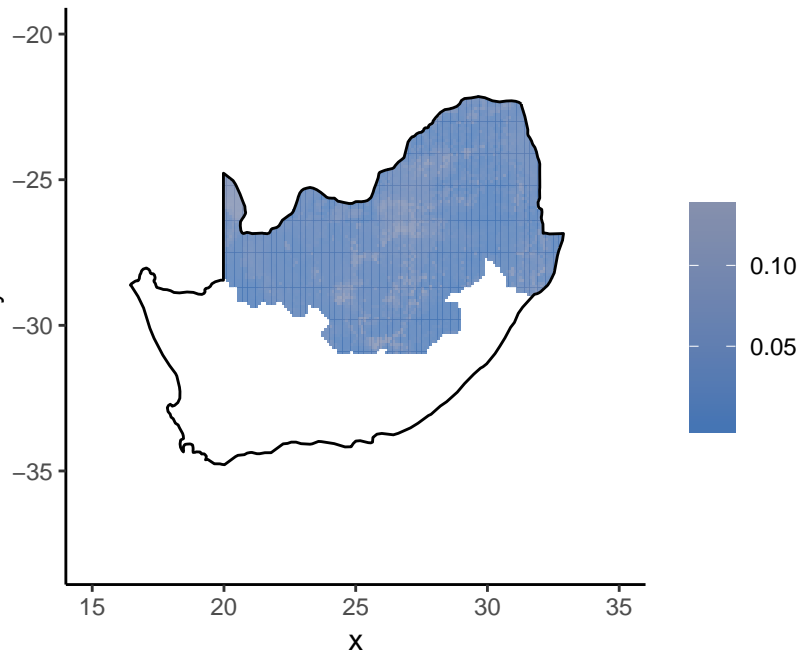

### Uncertainty

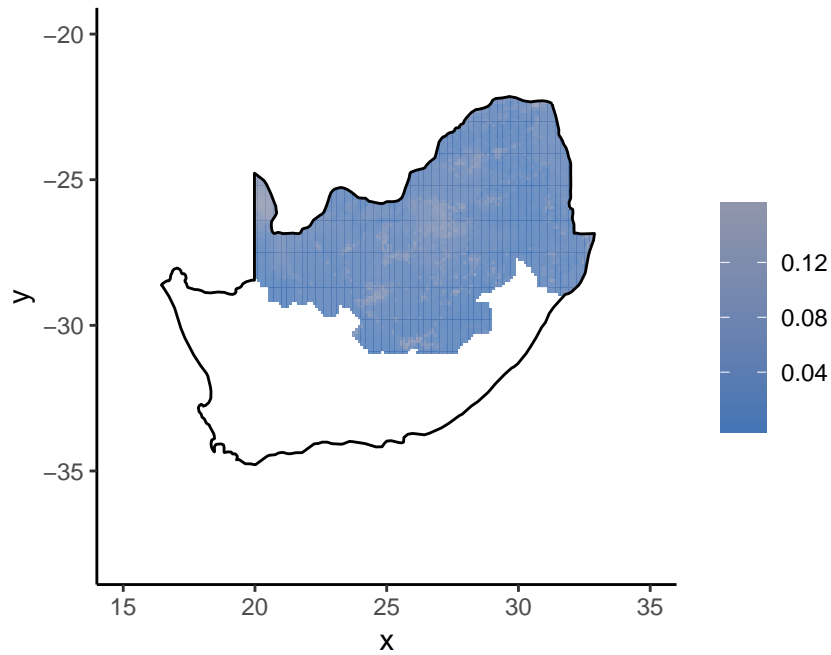

### Bontebok (RECENT)

Dataset

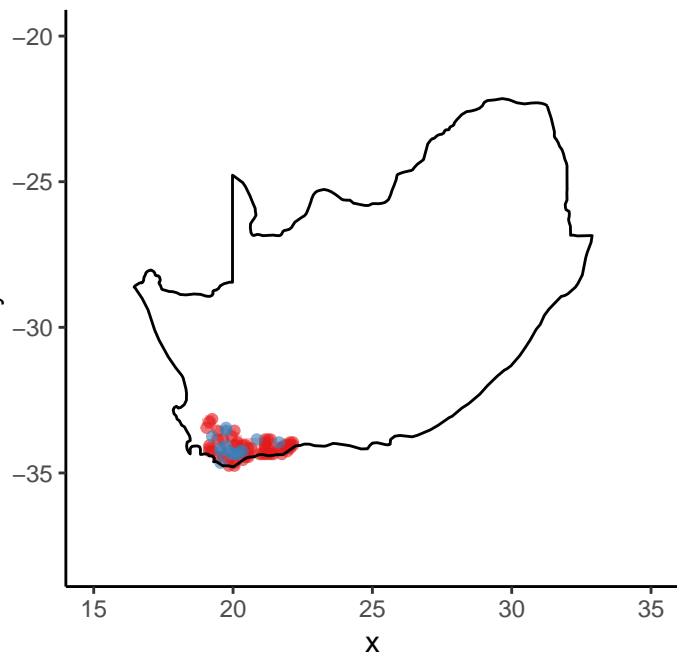

### Bontebok (TOTAL)

Dataset

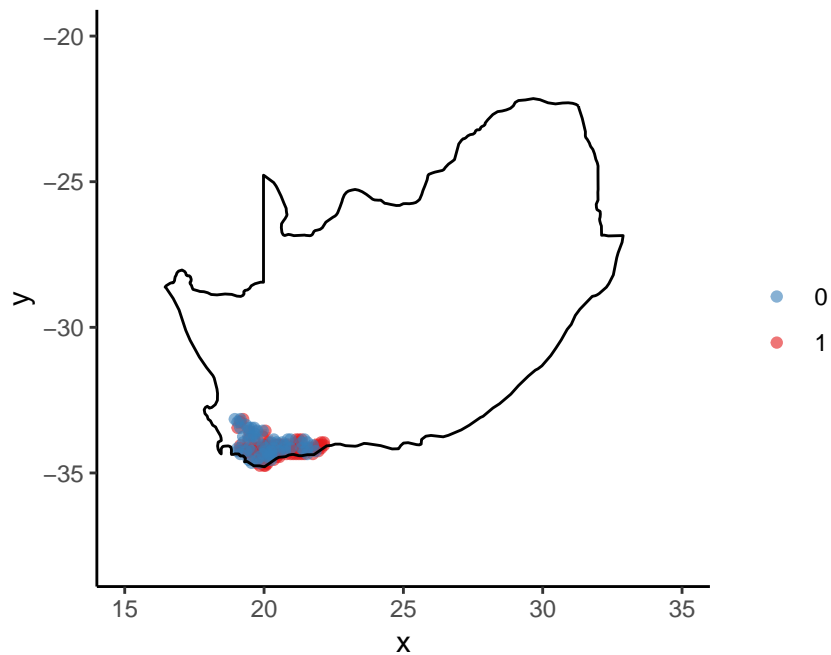

### Habitat suitability

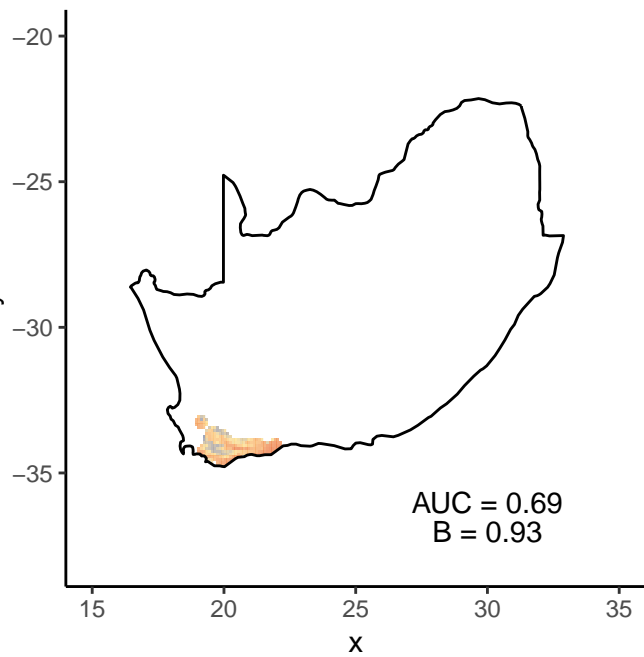

### Habitat suitability

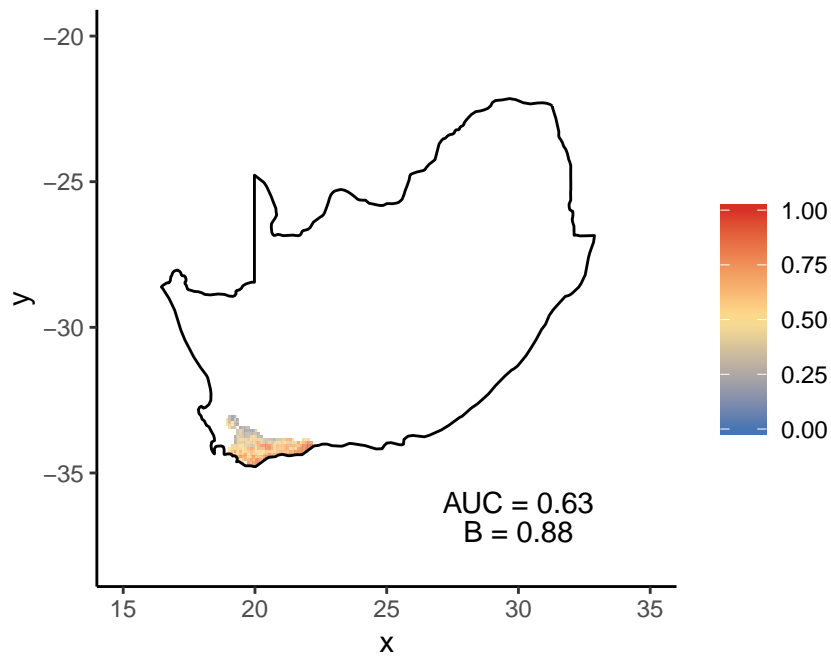

### Uncertainty

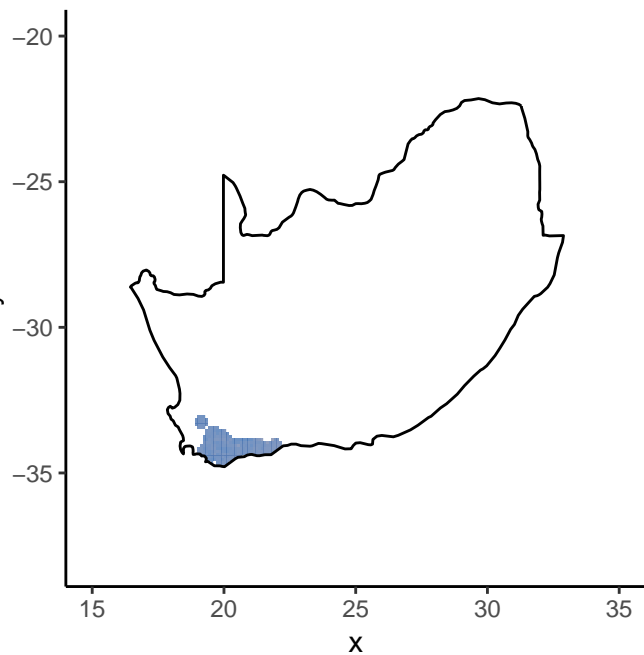

### Uncertainty

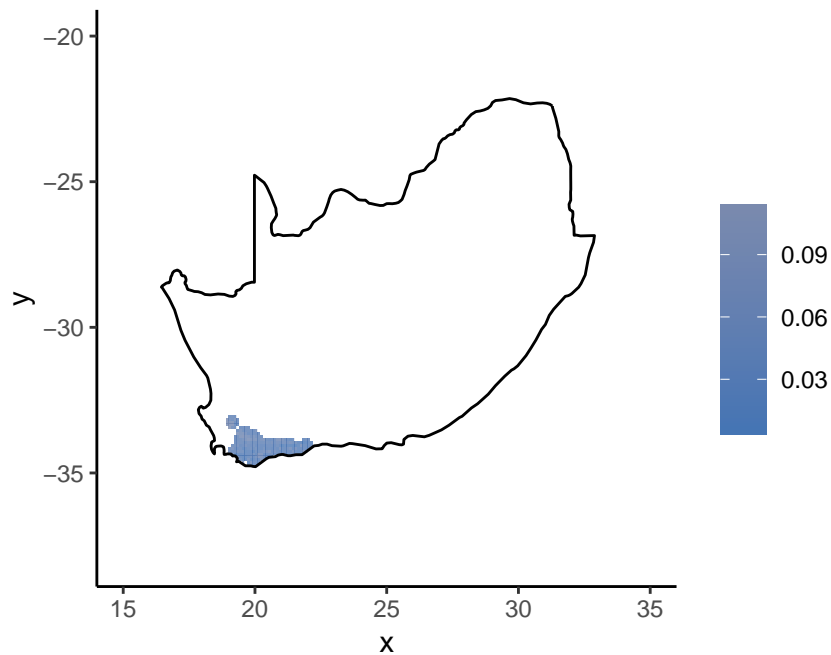

### Brown hyaena (RECENT)

Dataset

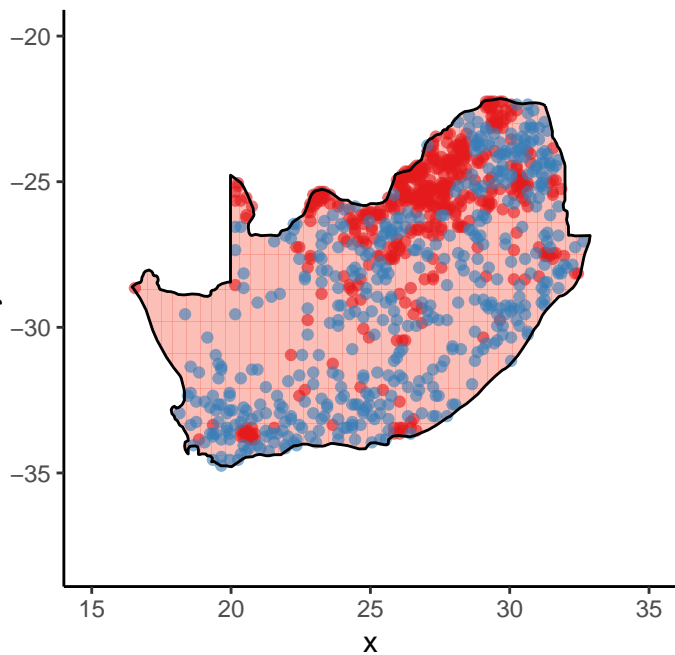

### Brown hyaena (TOTAL)

Dataset

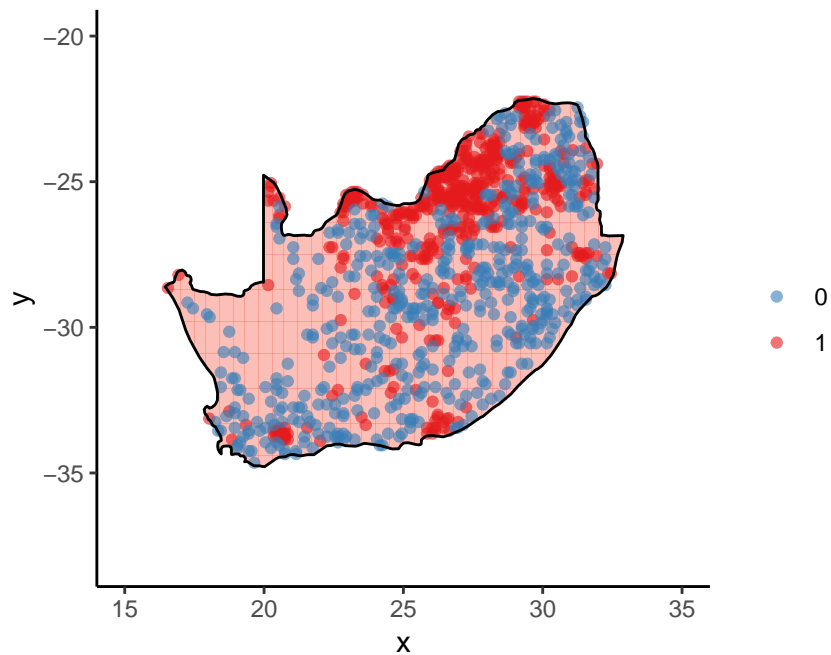

### Habitat suitability

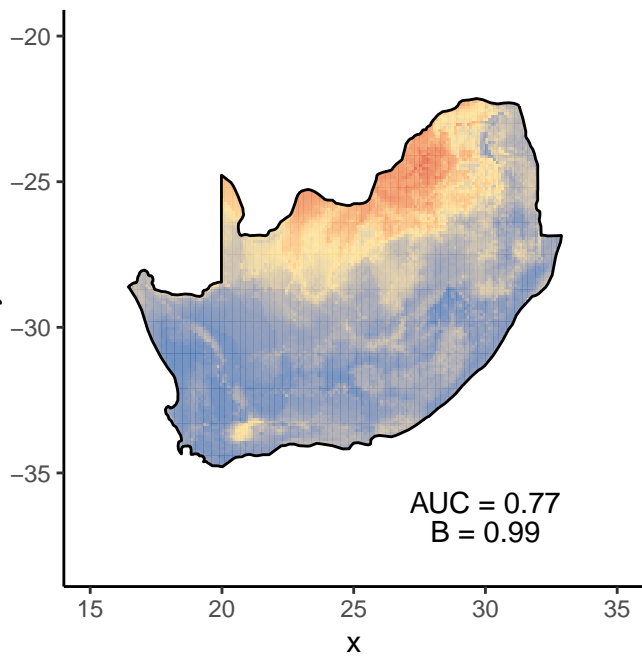

### Habitat suitability

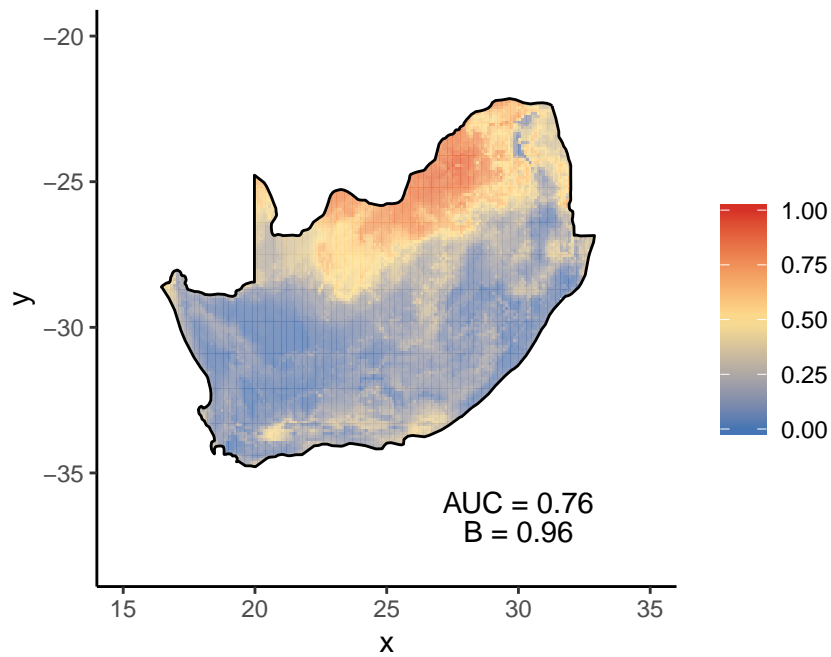

### Uncertainty

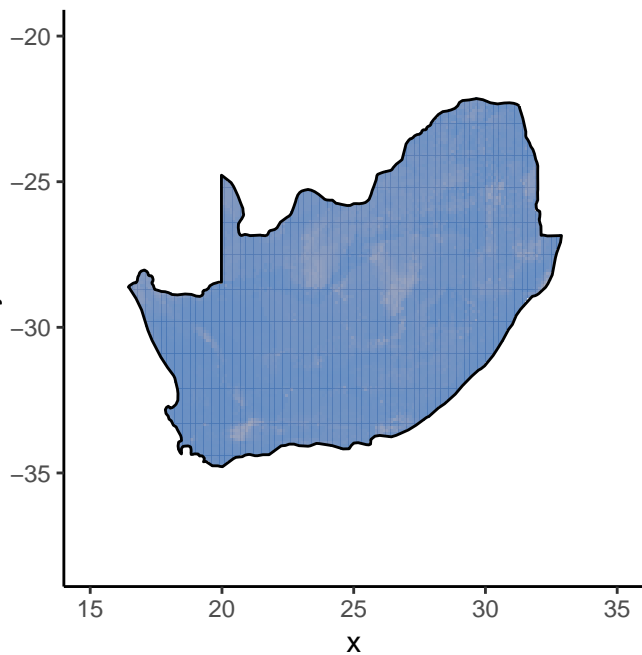

### Uncertainty

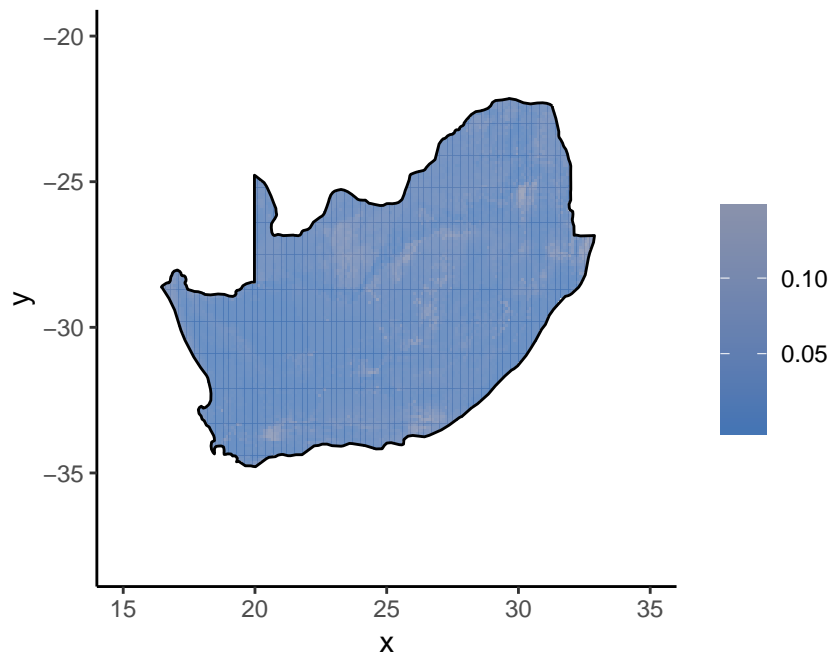



Burchells zebra (RECENT)

Dataset

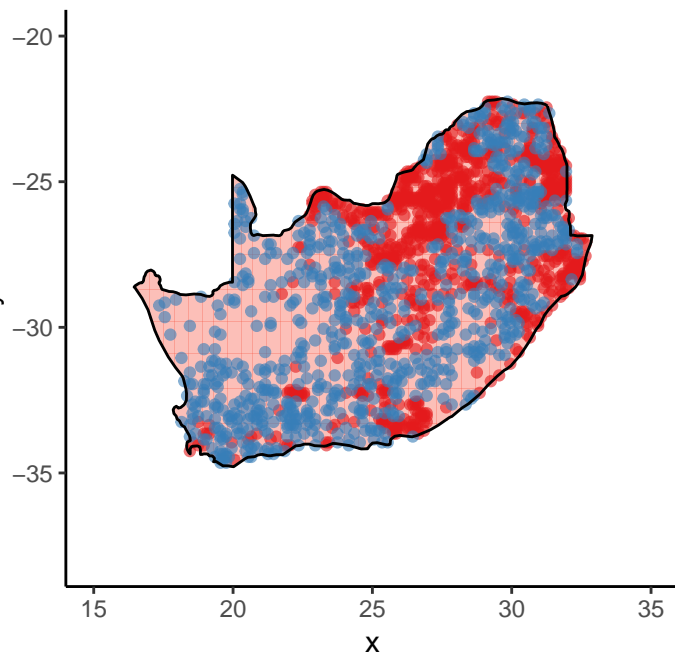

Burchells zebra (TOTAL)

Dataset

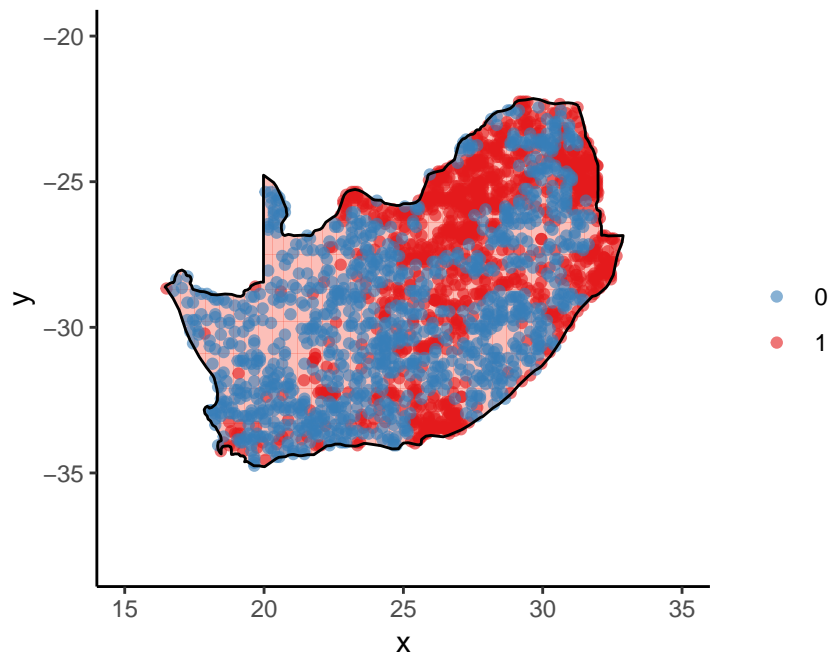

Habitat suitability

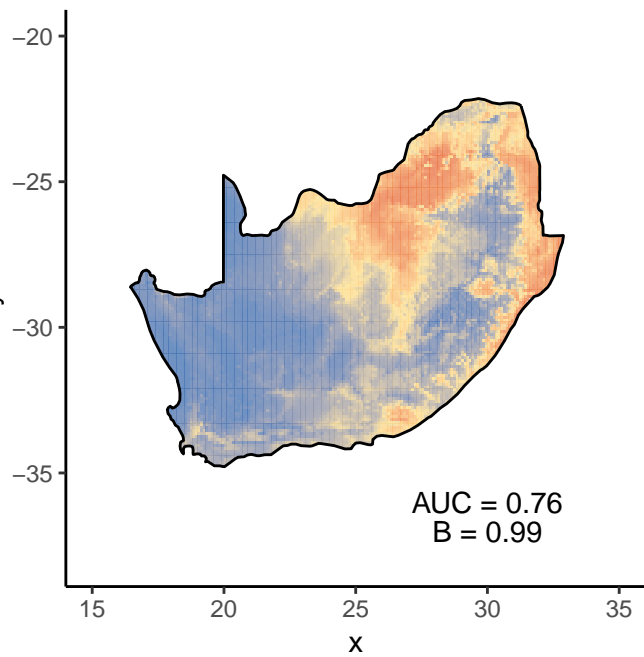

Habitat suitability

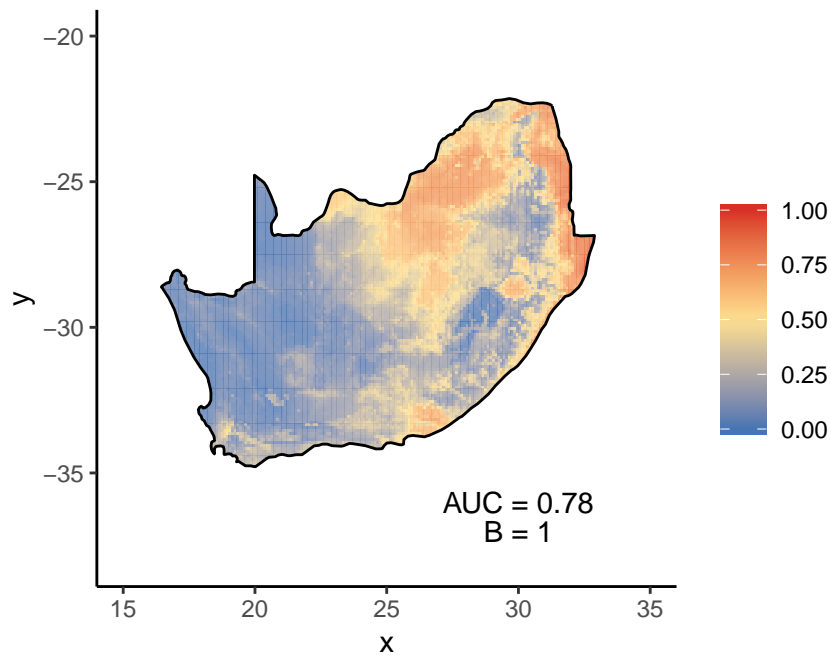

Uncertainty

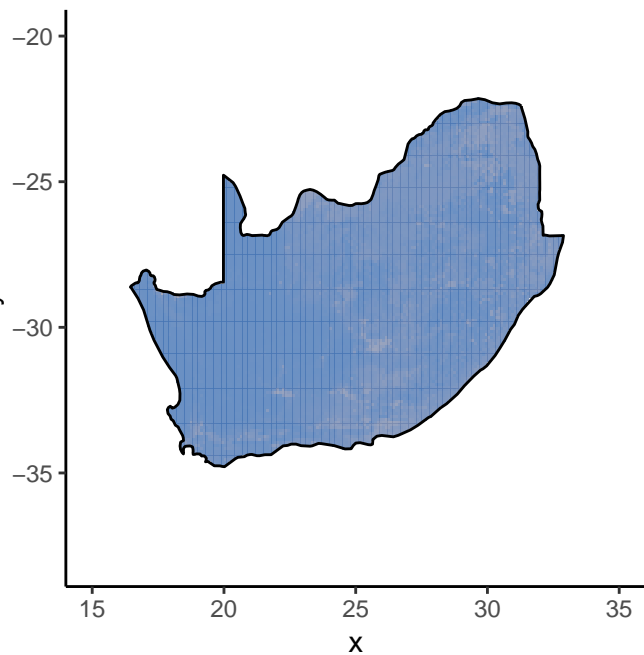

Uncertainty

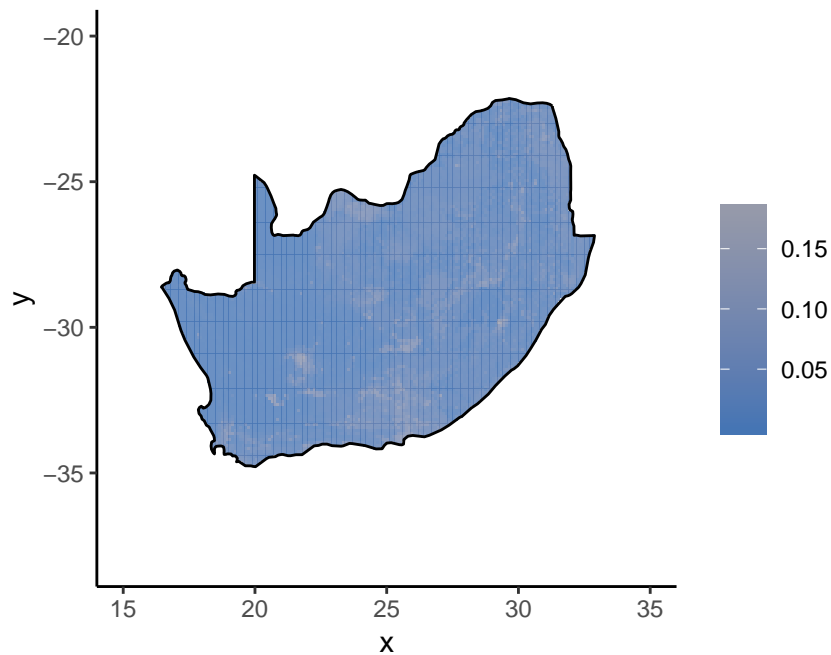

### Bushbuck (RECENT)

Dataset

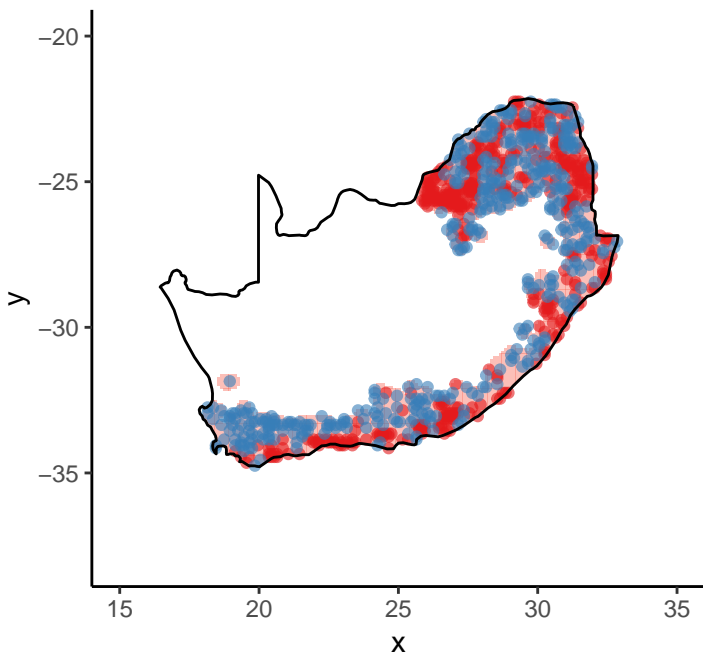

### Bushbuck (TOTAL)

Dataset

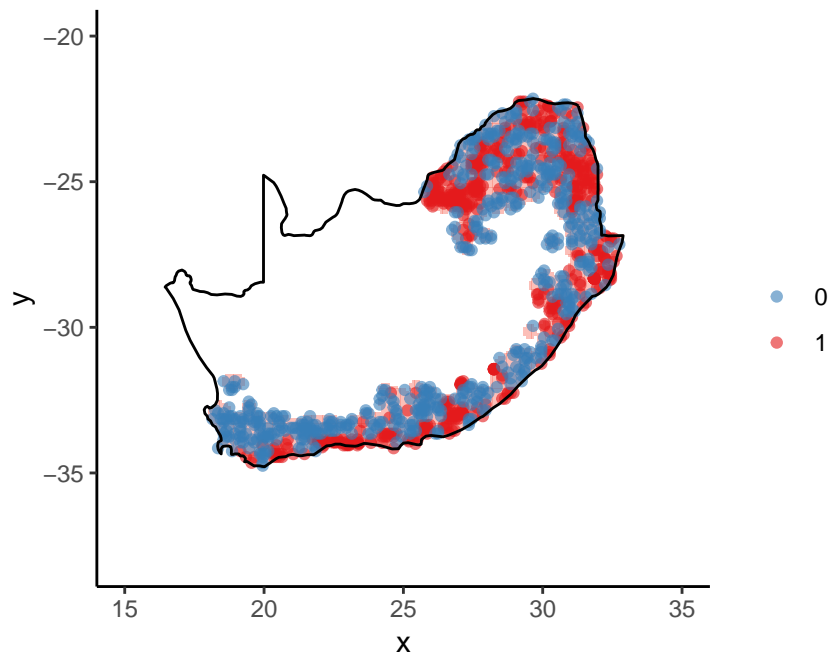

### Habitat suitability

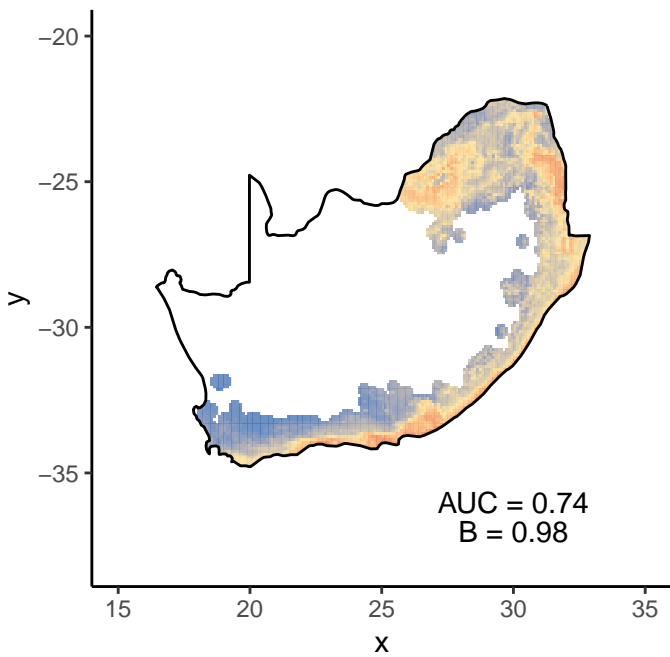

### Habitat suitability

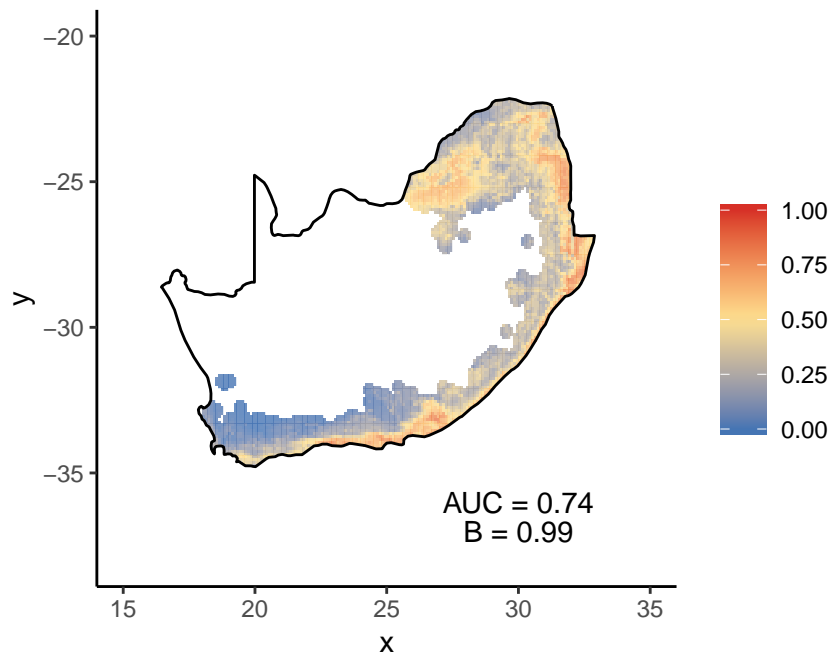

### Uncertainty

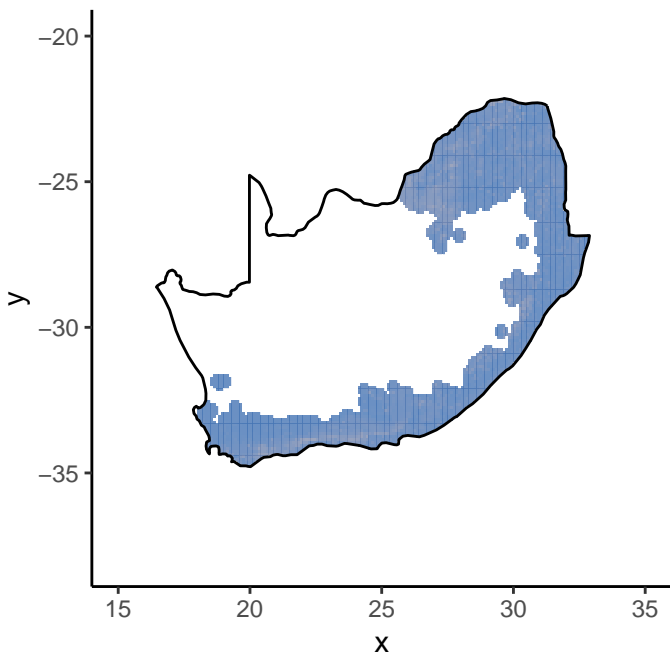

### Uncertainty

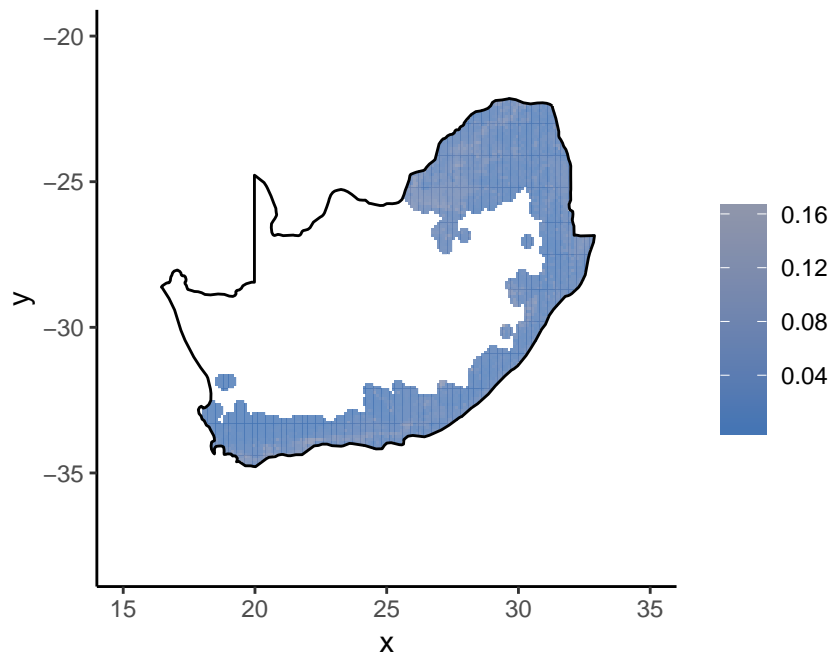

### Bushpig (RECENT)

Dataset

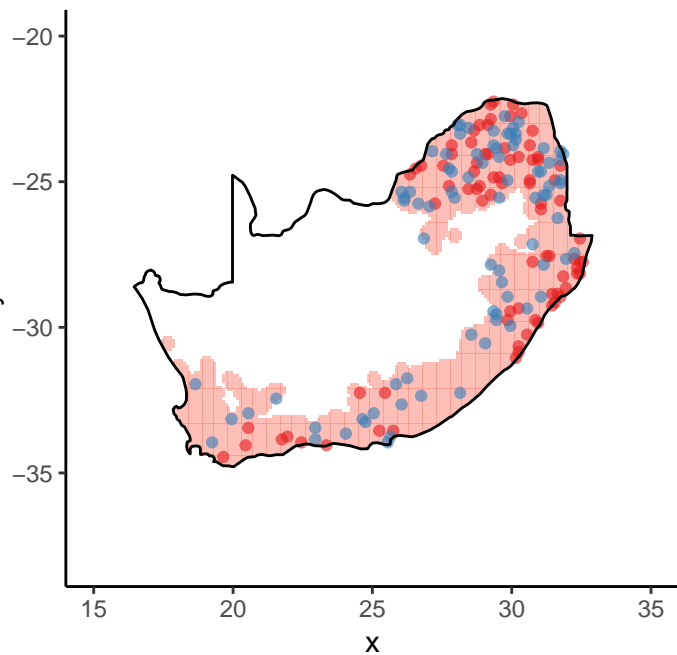

### Bushpig (TOTAL)

Dataset

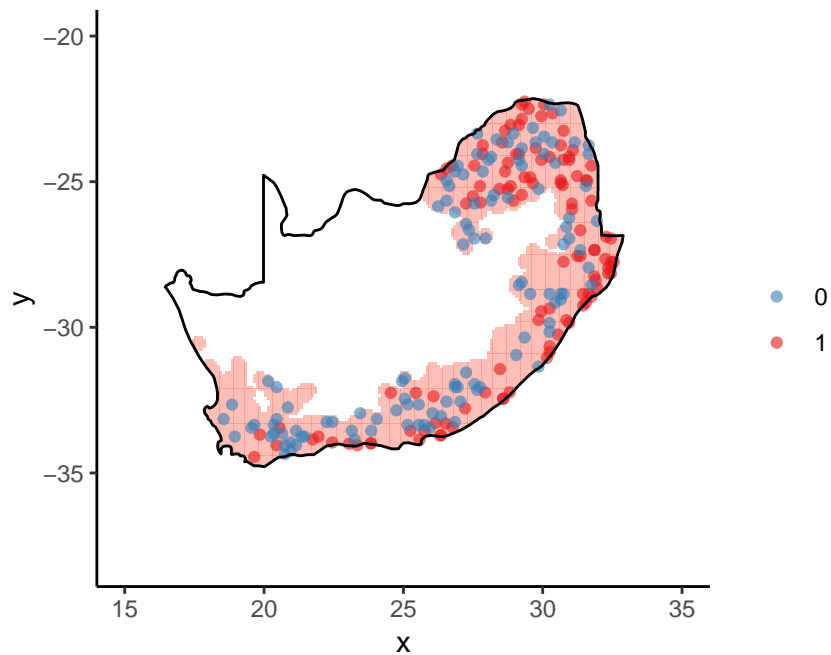

### Habitat suitability

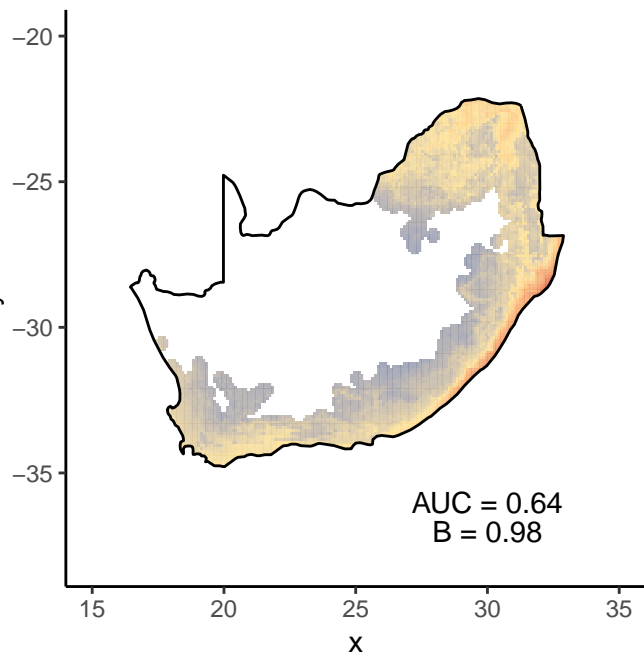

### Habitat suitability

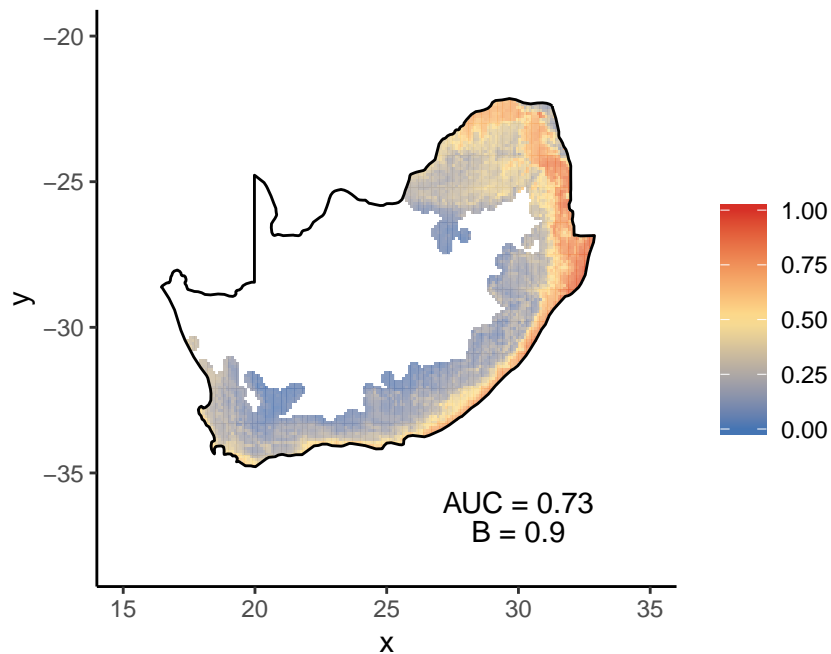

### Uncertainty

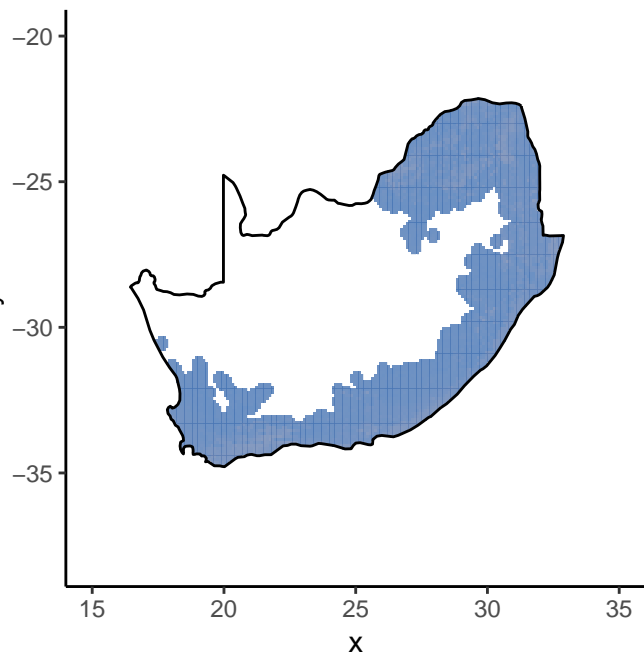

### Uncertainty

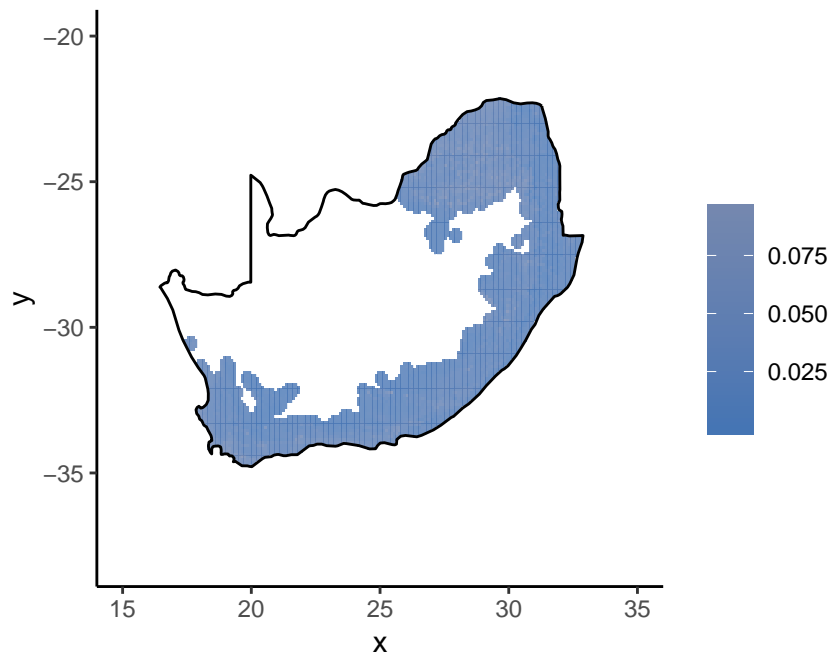

### Cape mountain zebra (RECENT)

Dataset

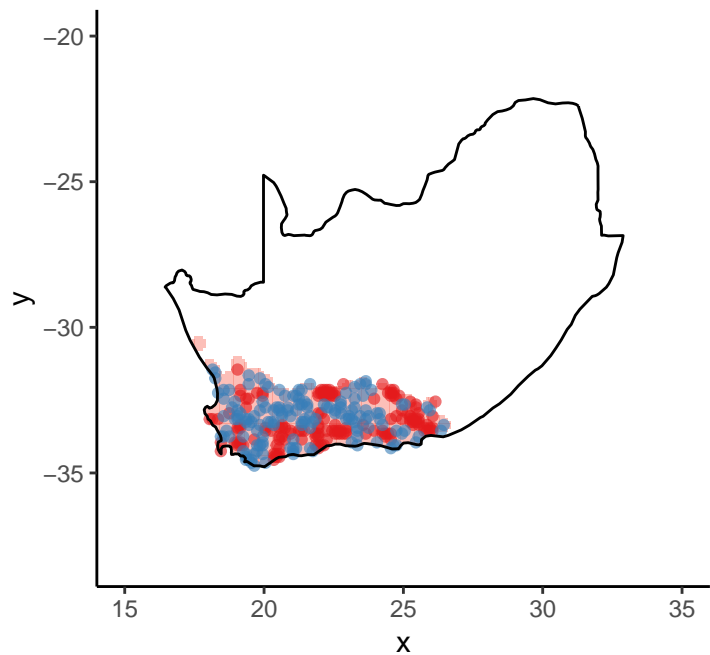

### Cape mountain zebra (TOTAL)

Dataset

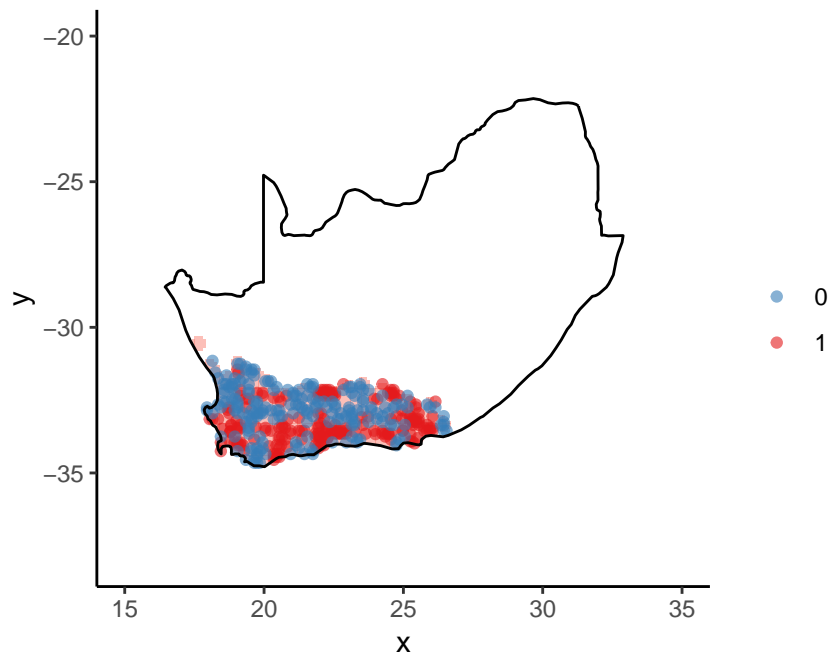

### Habitat suitability

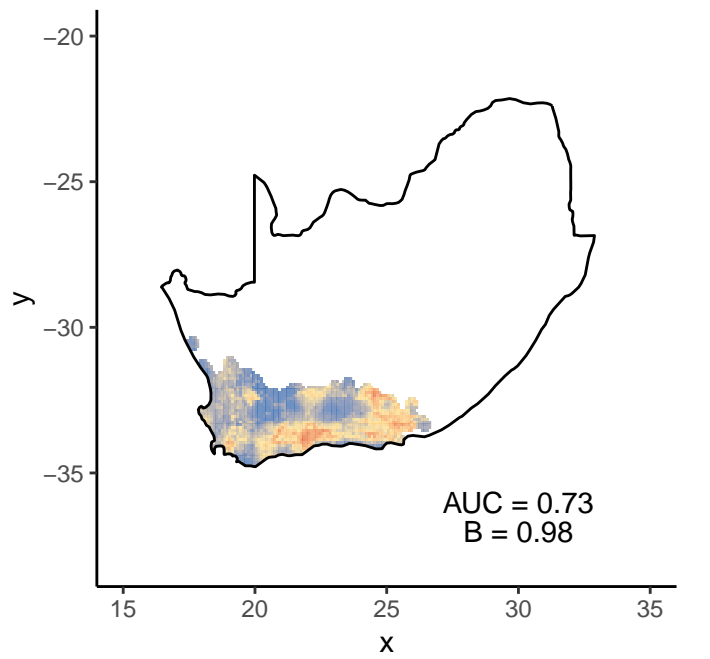

### Habitat suitability

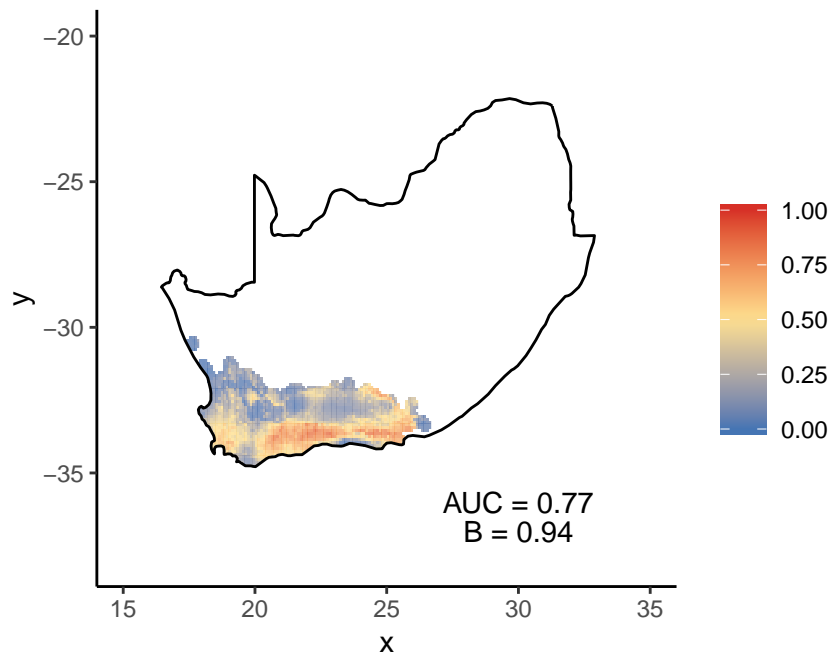

### Uncertainty

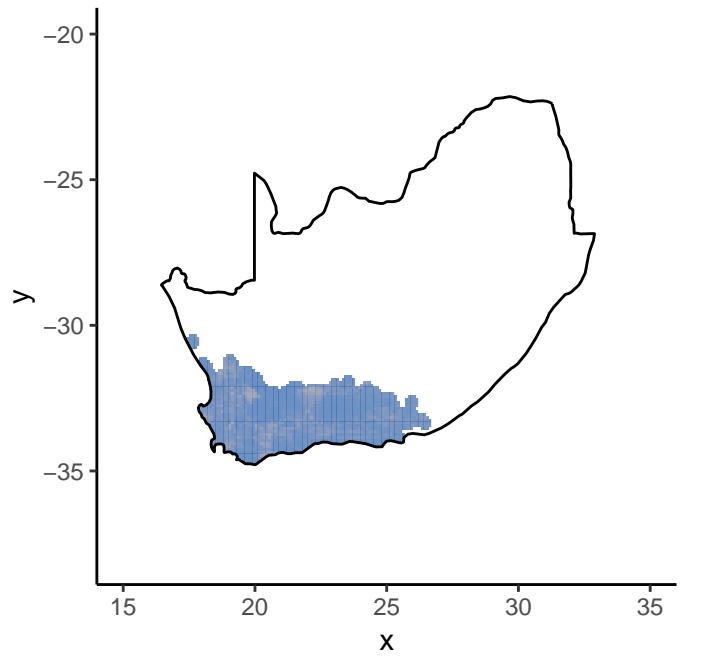

### Uncertainty

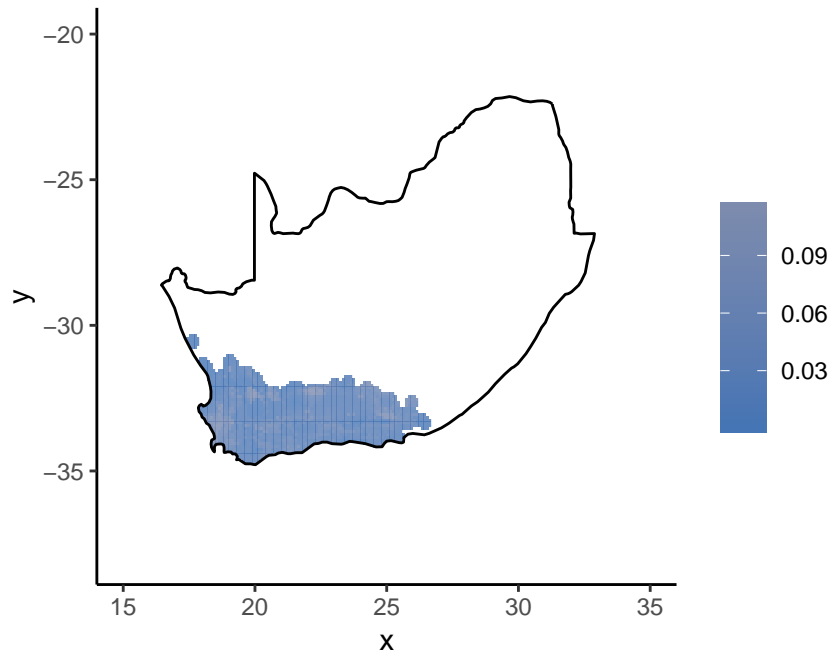

### Cheetah (RECENT)

Dataset

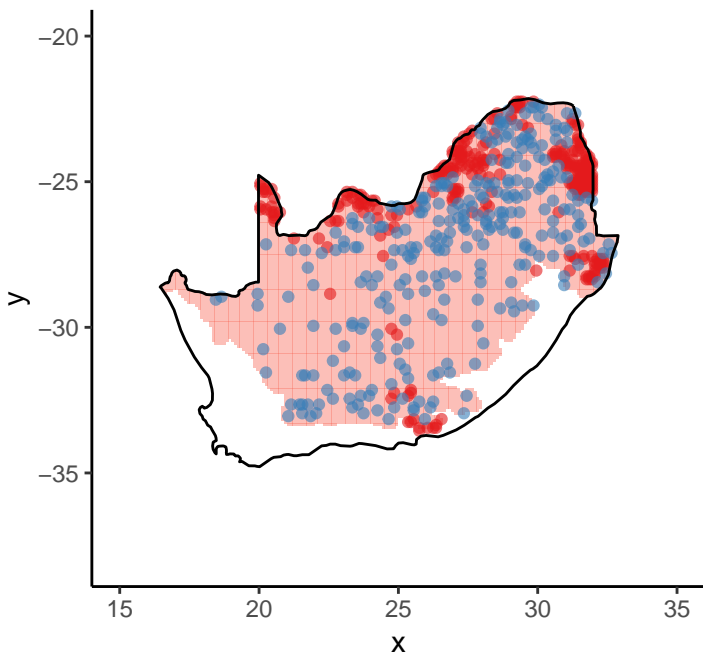

### Cheetah (TOTAL)

Dataset

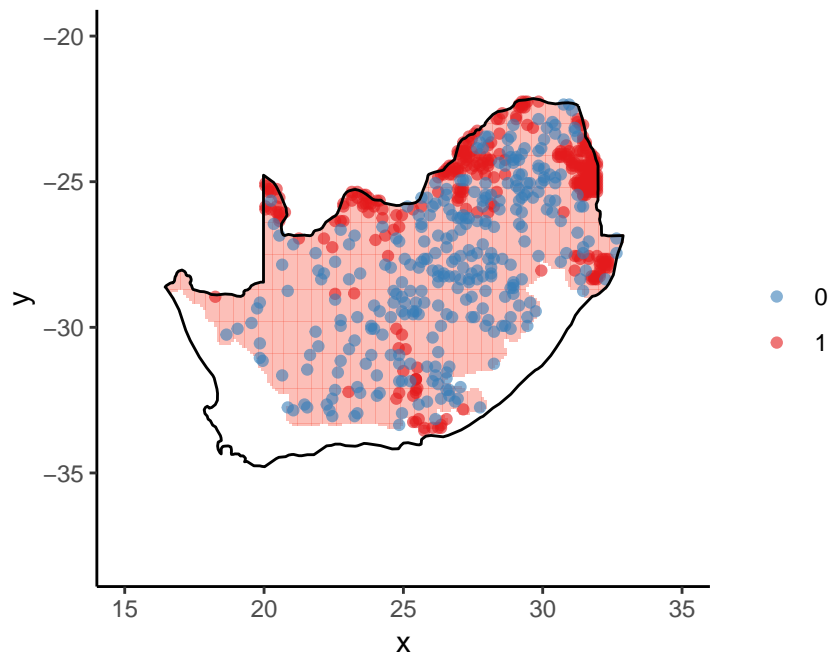

### Habitat suitability

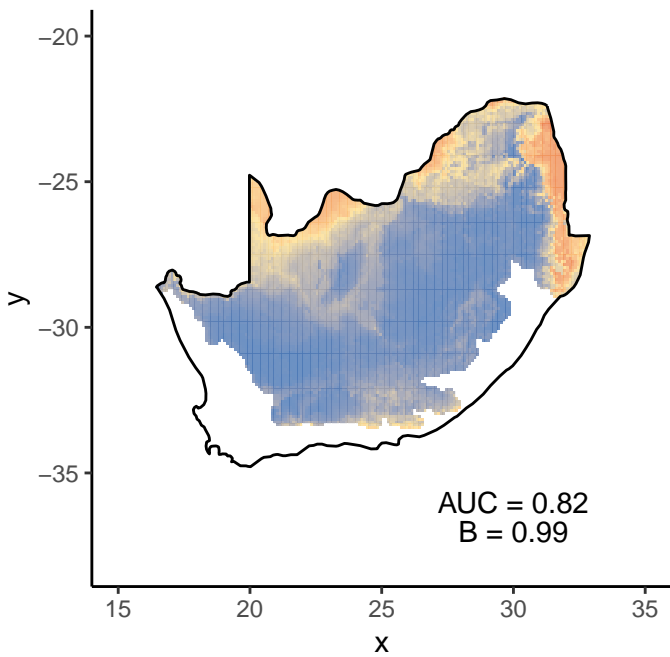

### Habitat suitability

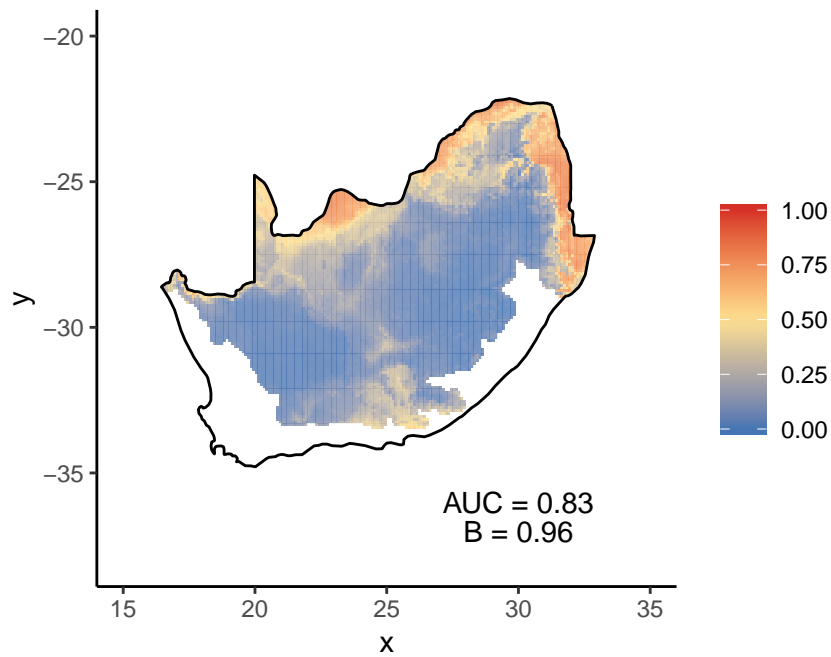

### Uncertainty

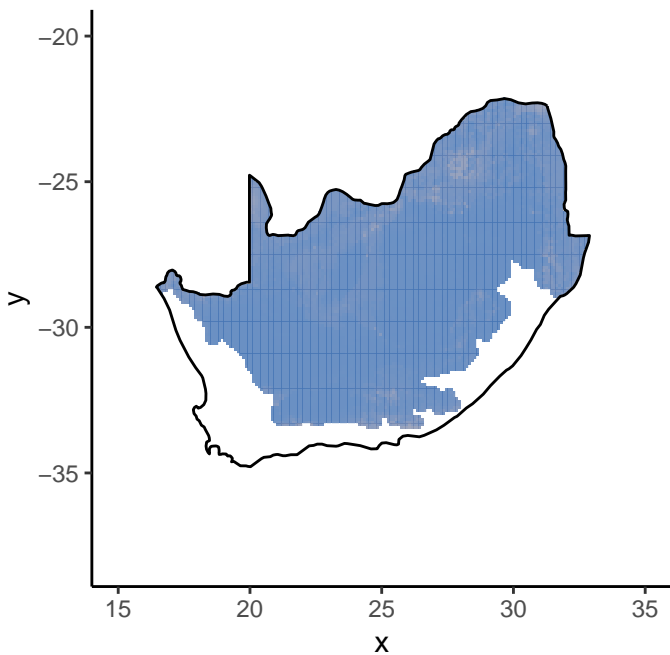

### Uncertainty

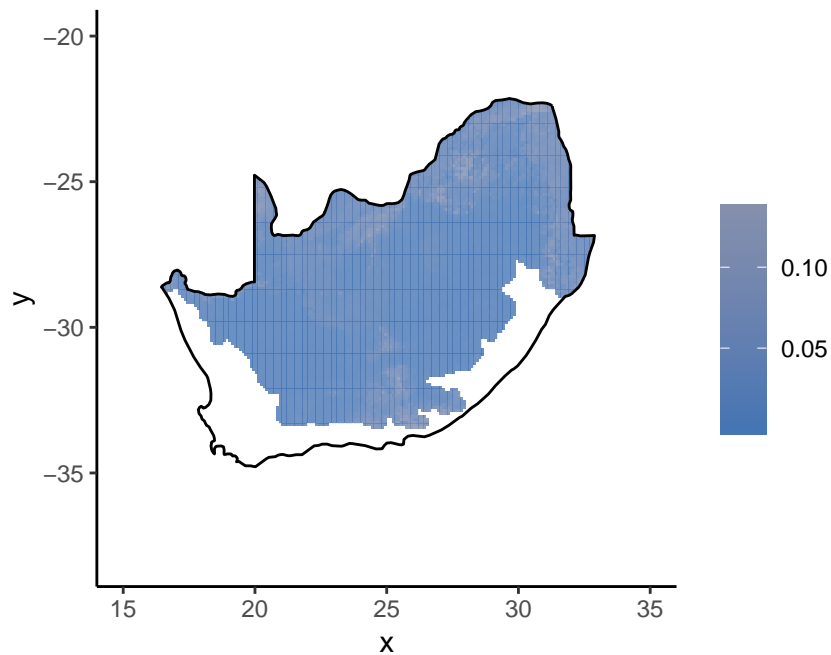

### Eland (RECENT)

Dataset

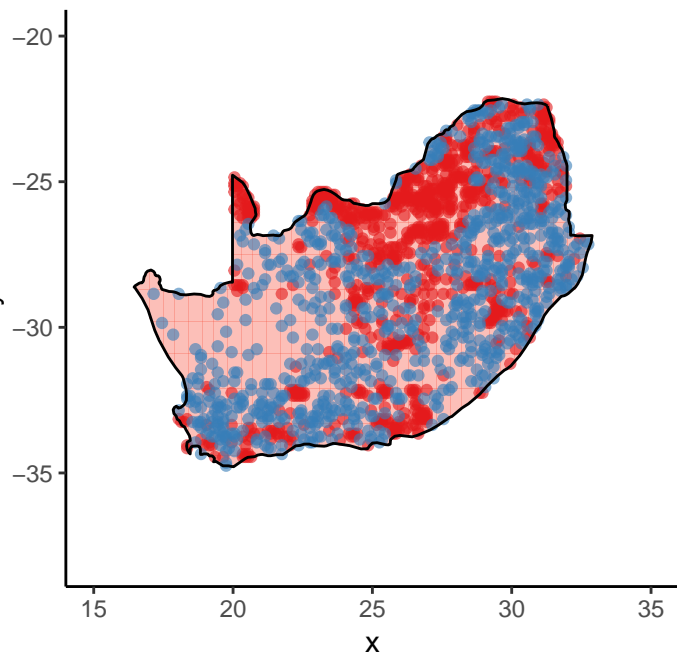

### Eland (TOTAL)

Dataset

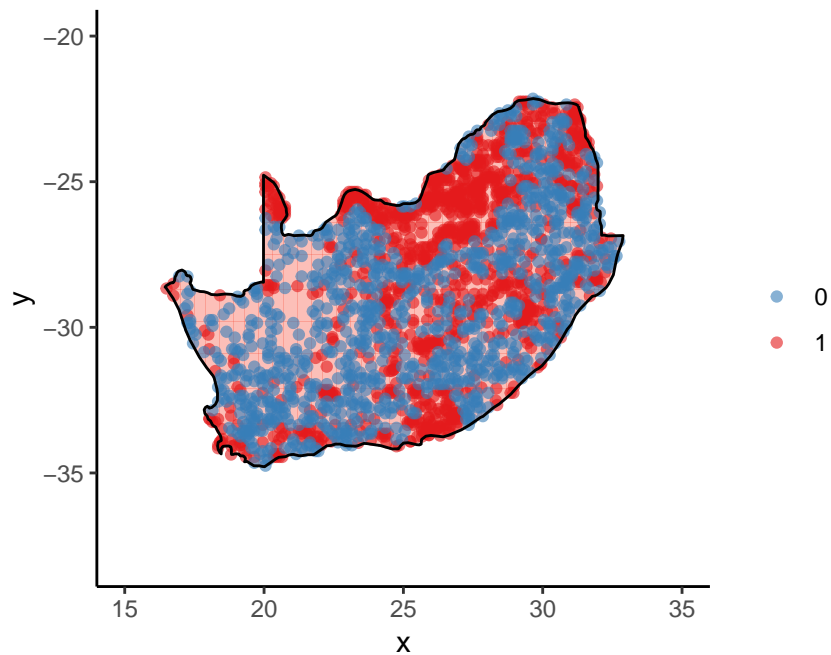

### Habitat suitability

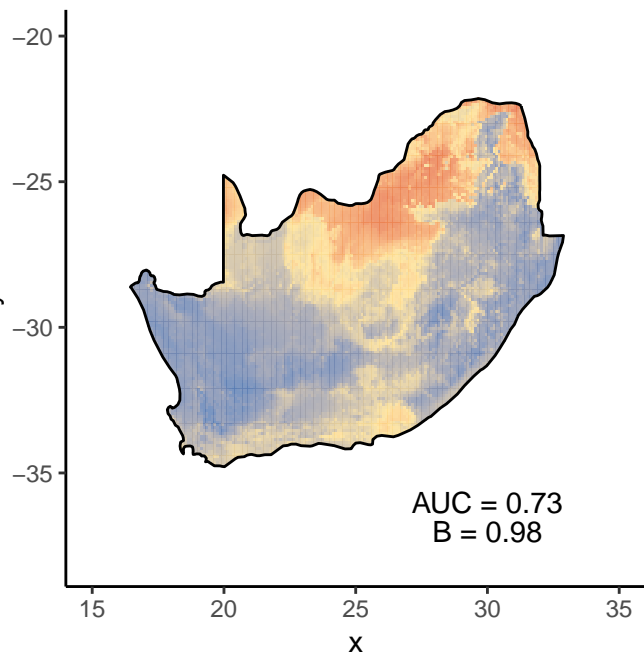

### Habitat suitability

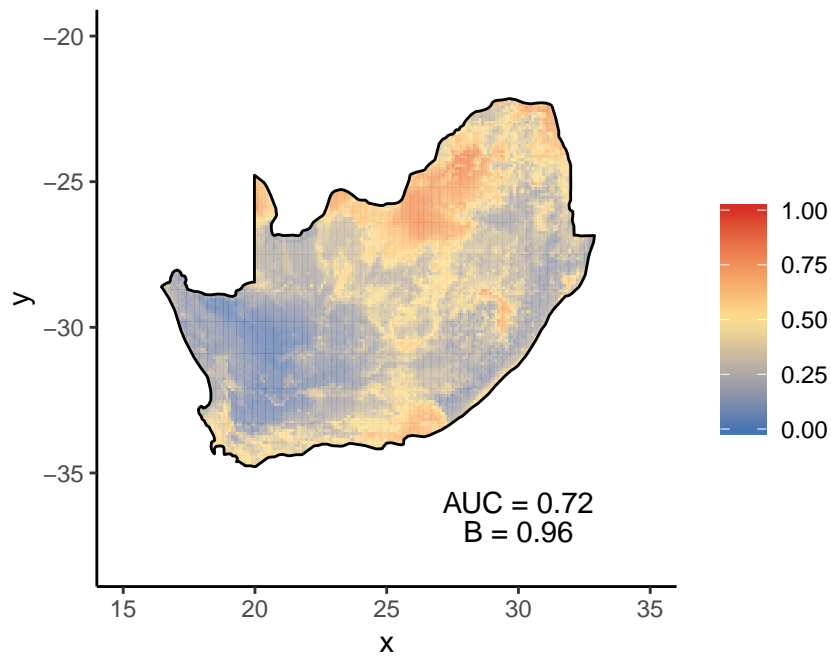

### Uncertainty

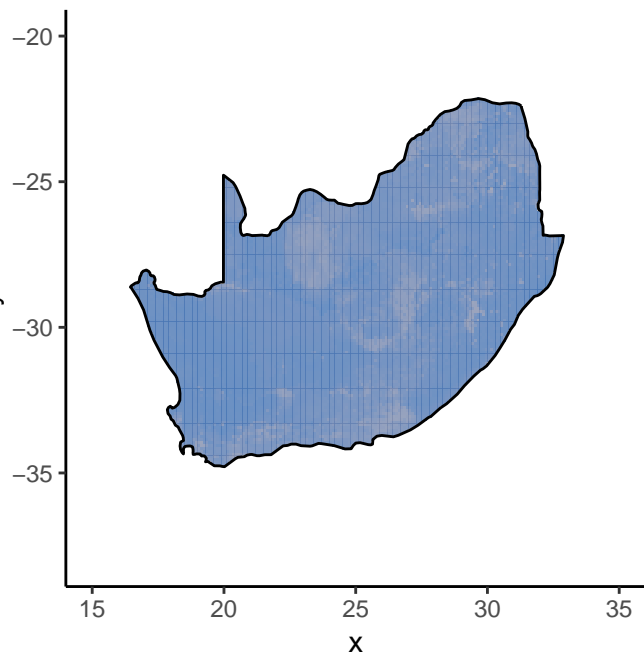

### Uncertainty

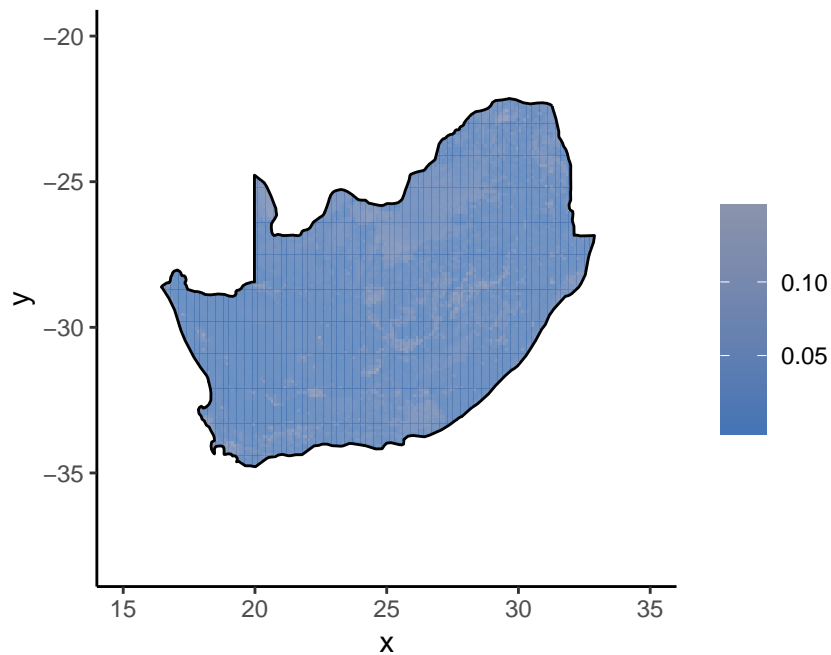

### Gemsbok (RECENT)

Dataset

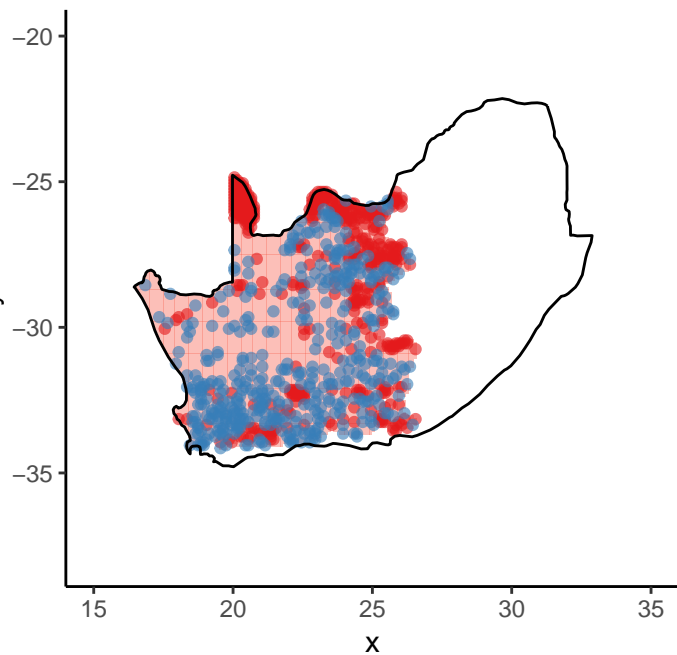

### Gemsbok (TOTAL)

Dataset

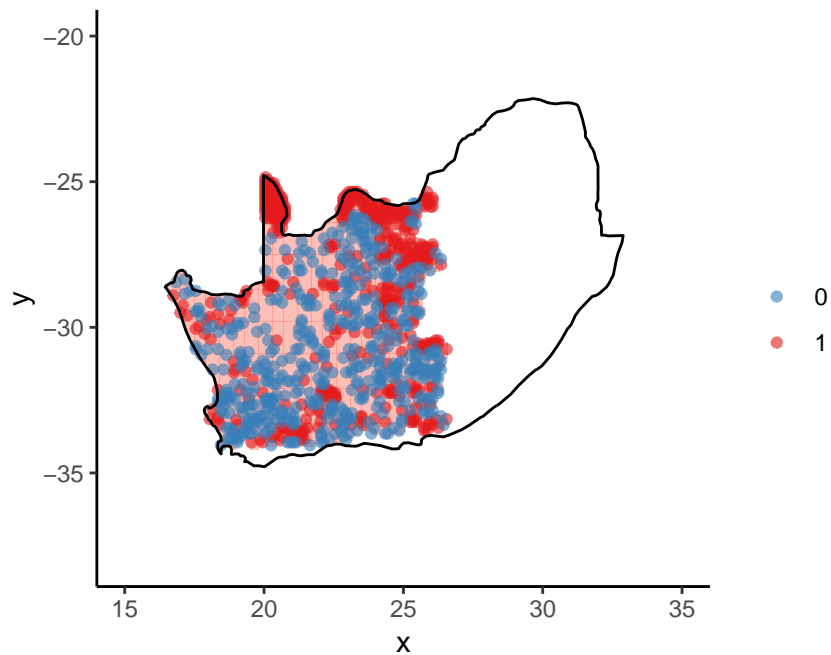

### Habitat suitability

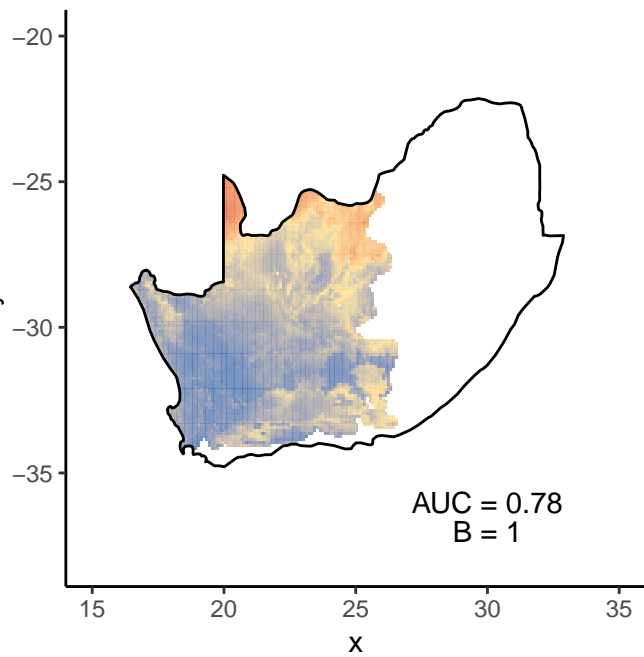

### Habitat suitability

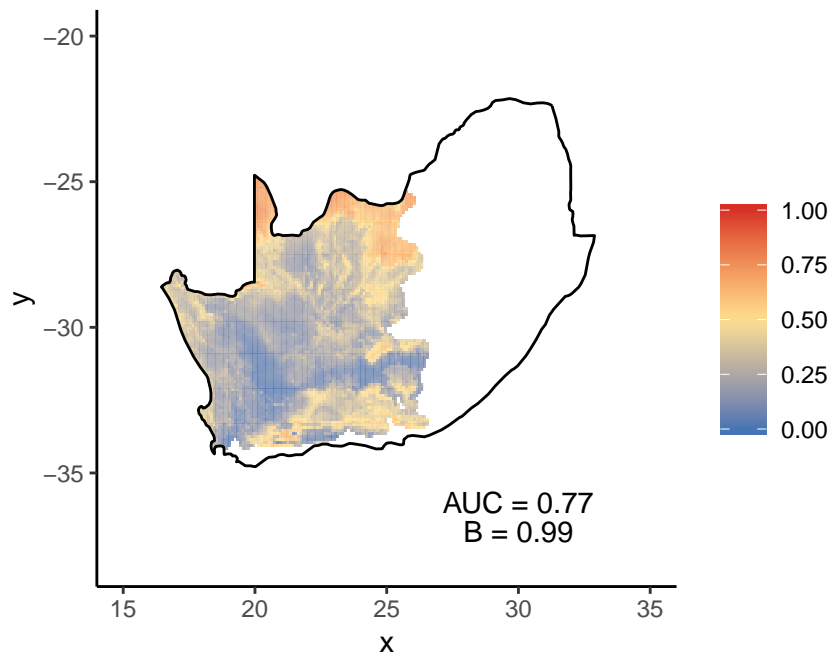

### Uncertainty

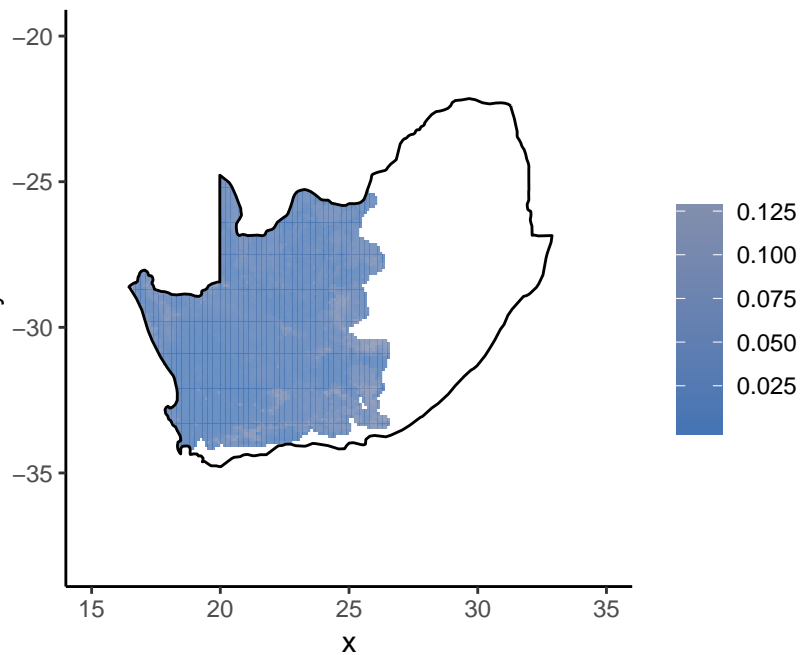

### Uncertainty

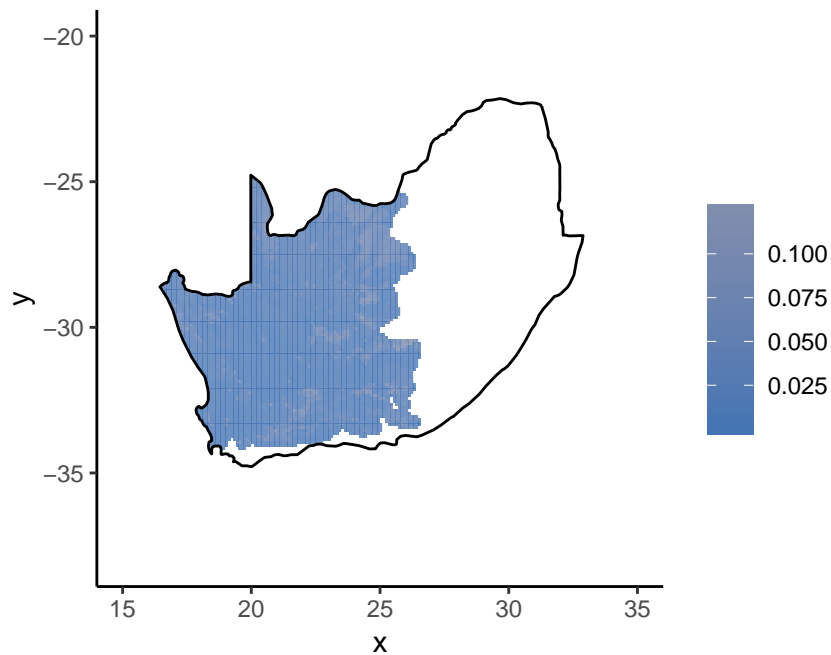

### Giraffe (RECENT)

Dataset

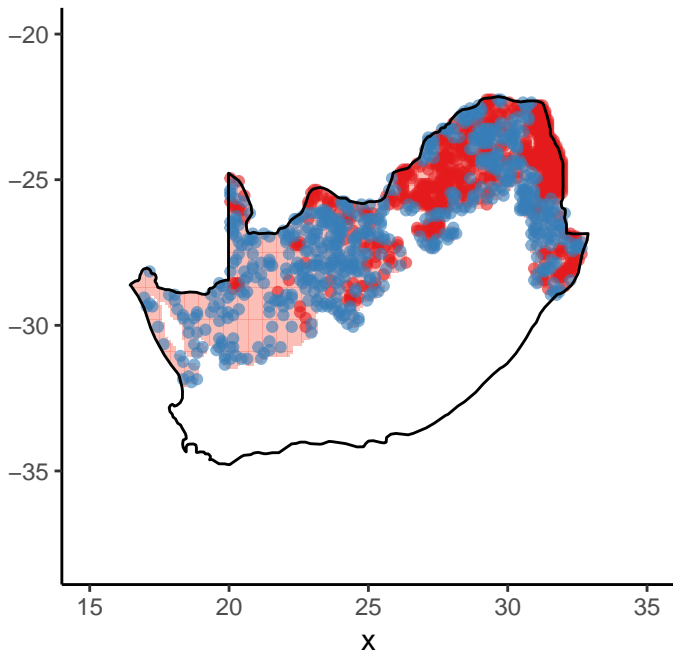

### Giraffe (TOTAL)

Dataset

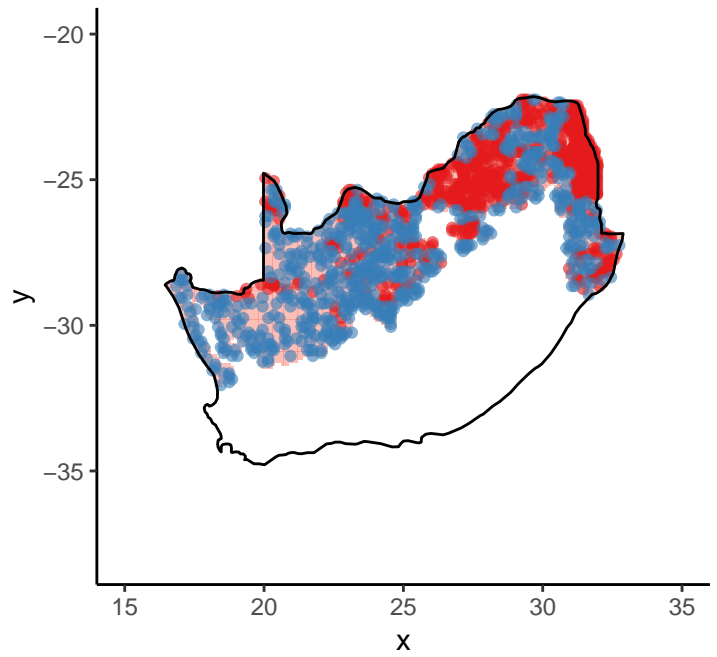

### Habitat suitability

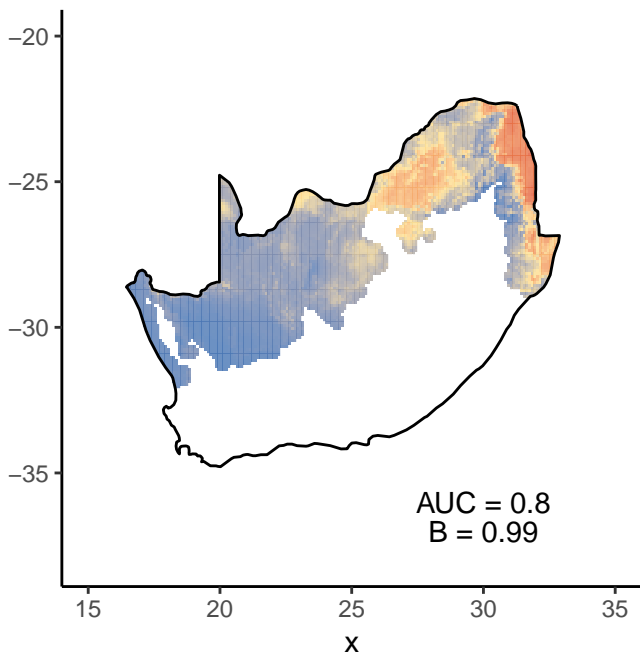

### Habitat suitability

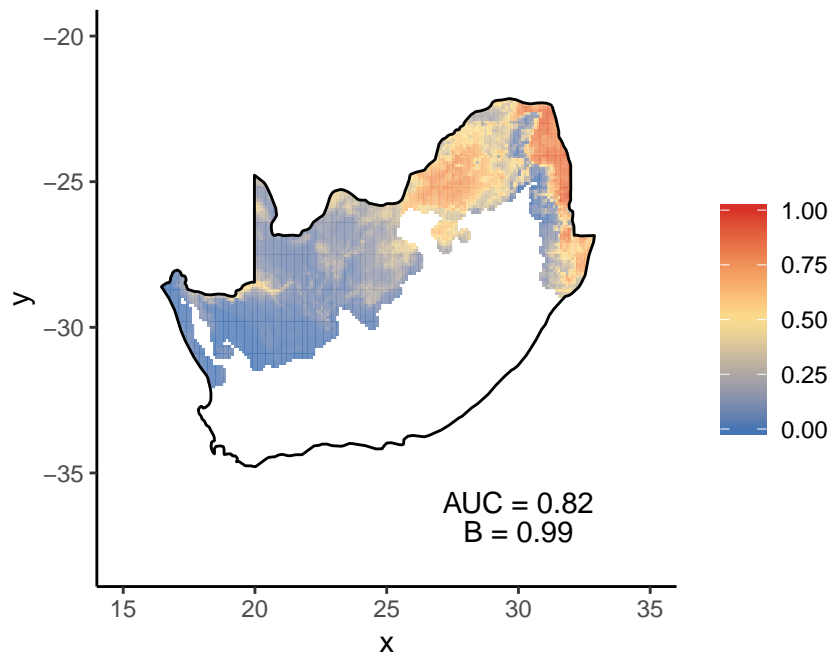

### Uncertainty

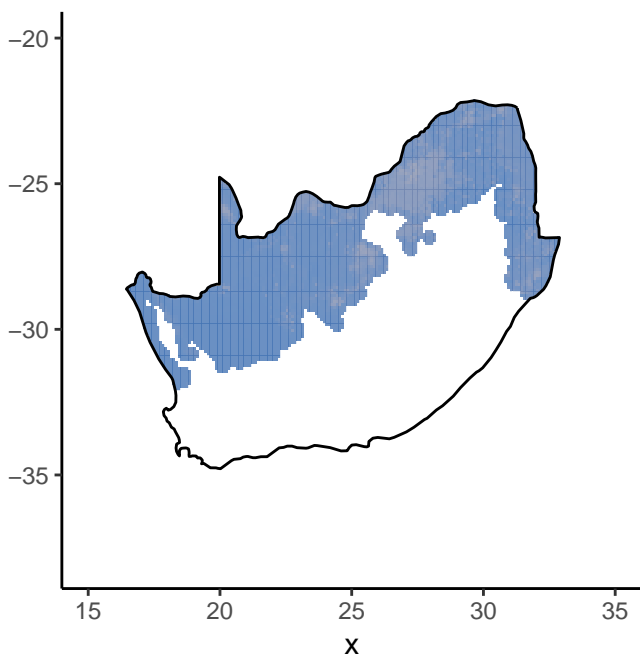

### Uncertainty

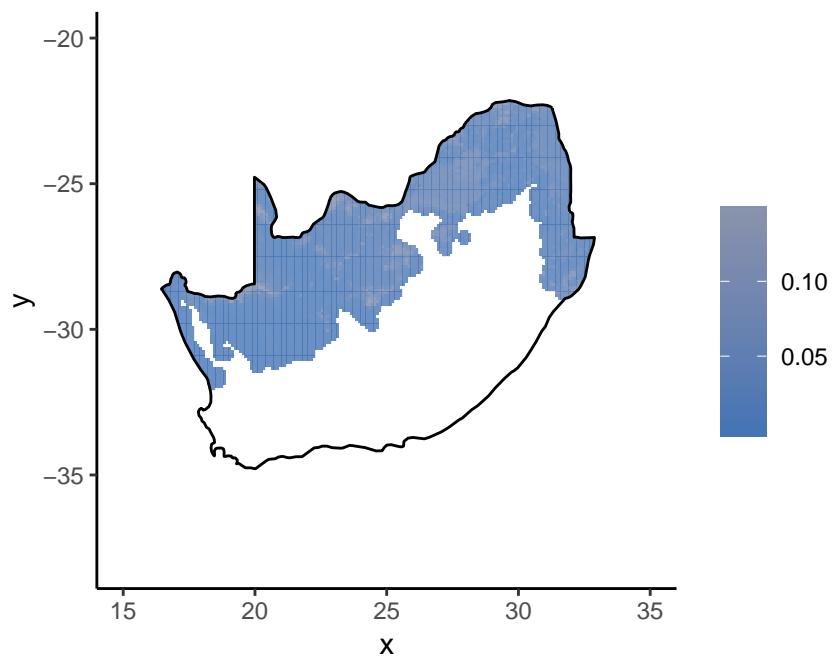



### Grey rhebok (RECENT)

Dataset

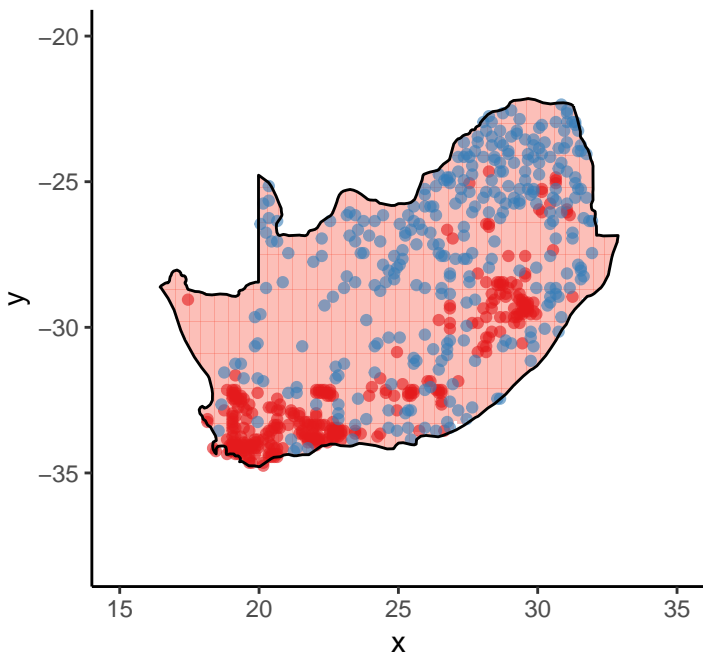

### Grey rhebok (TOTAL)

Dataset

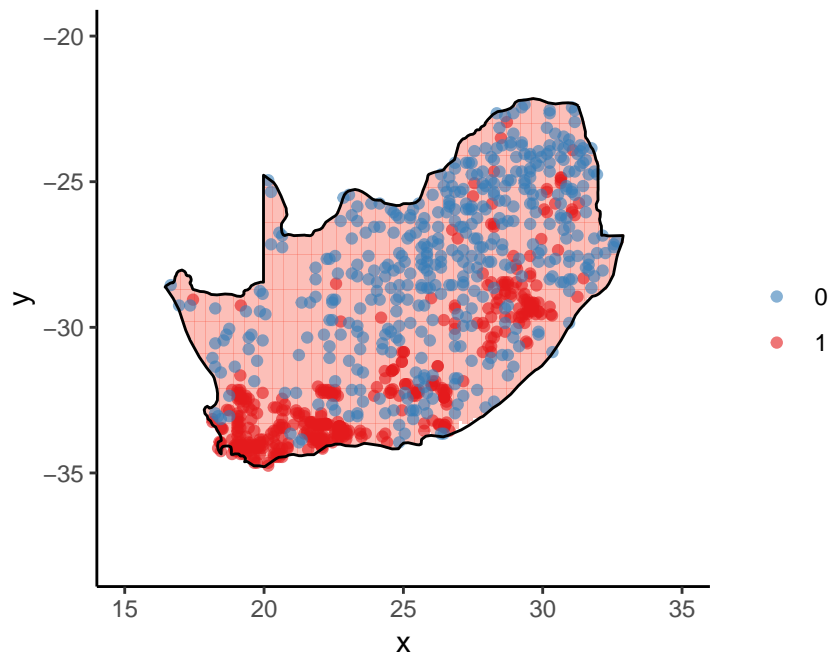

### Habitat suitability

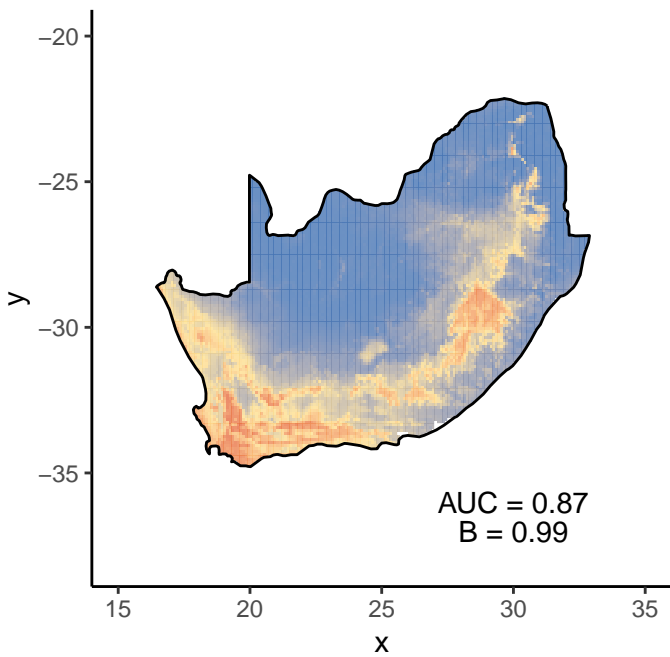

### Habitat suitability

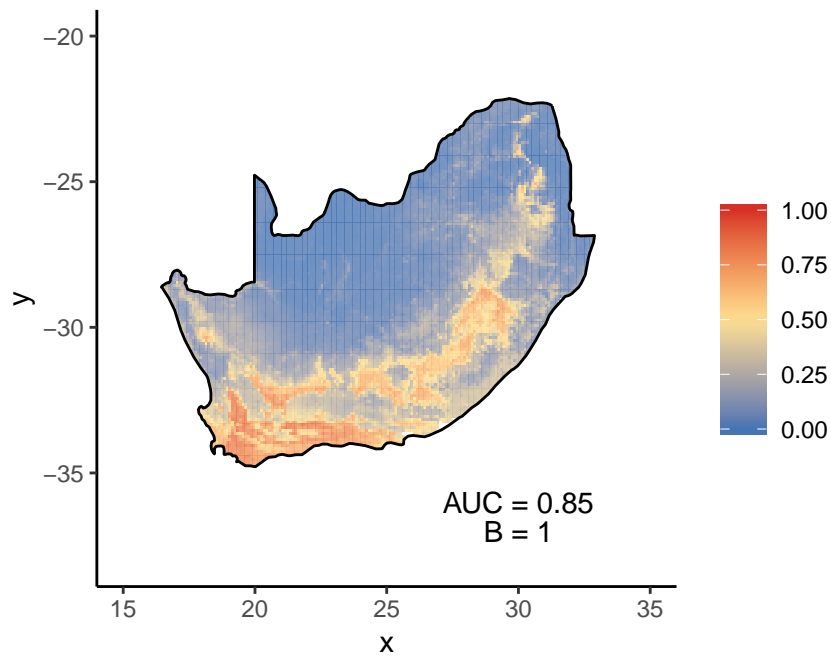

### Uncertainty

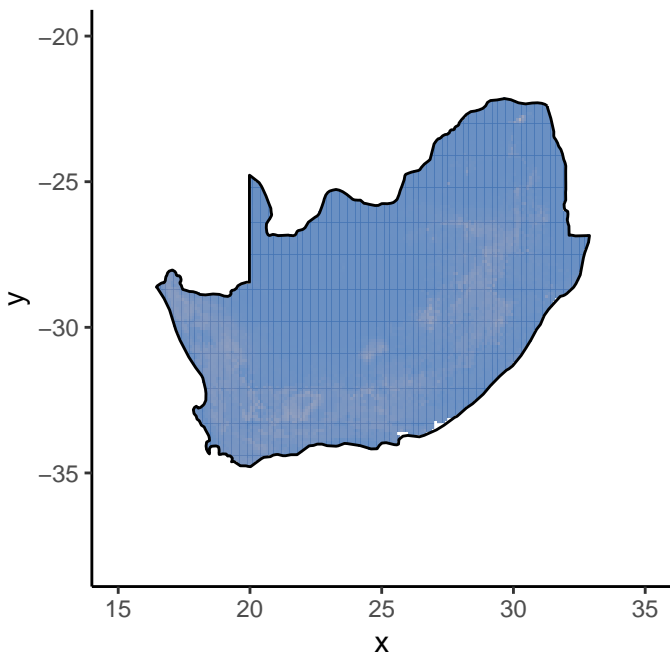

### Uncertainty

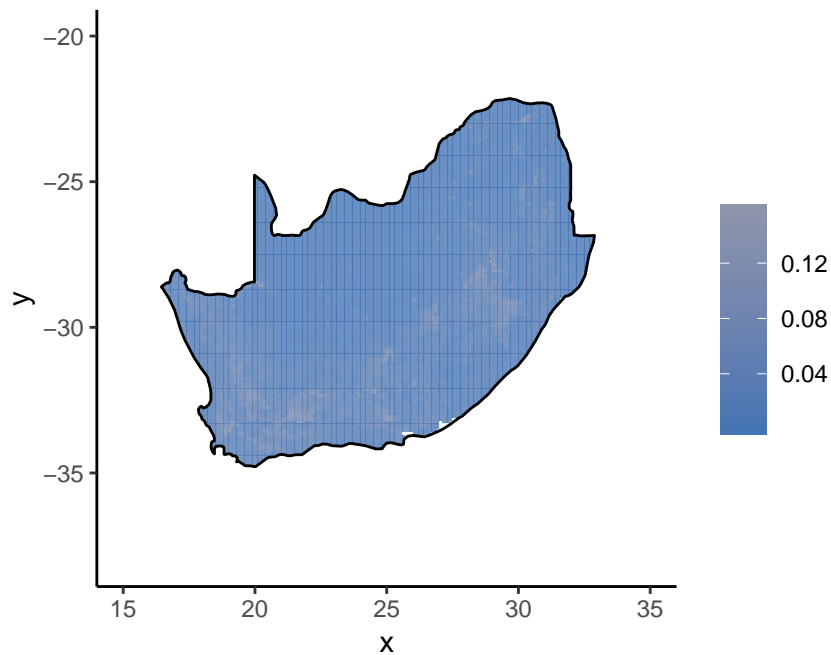

### Hippopotamus (RECENT)

Dataset

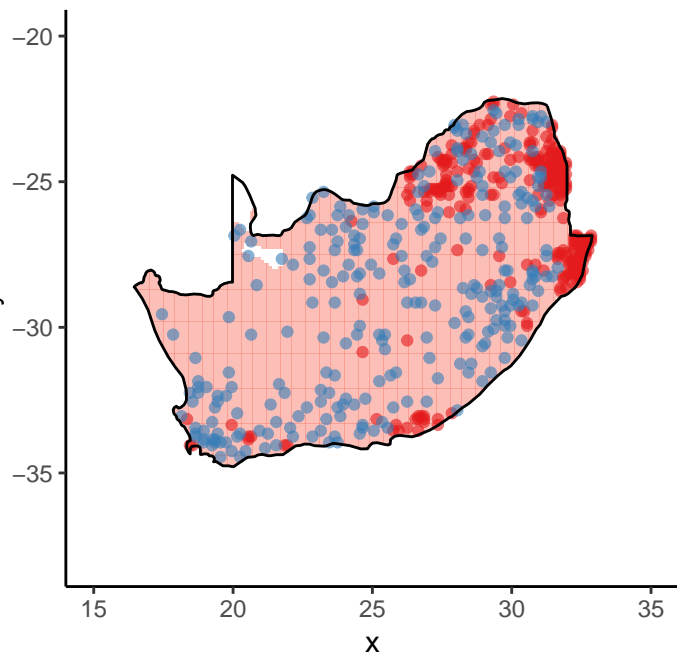

### Hippopotamus (TOTAL)

Dataset

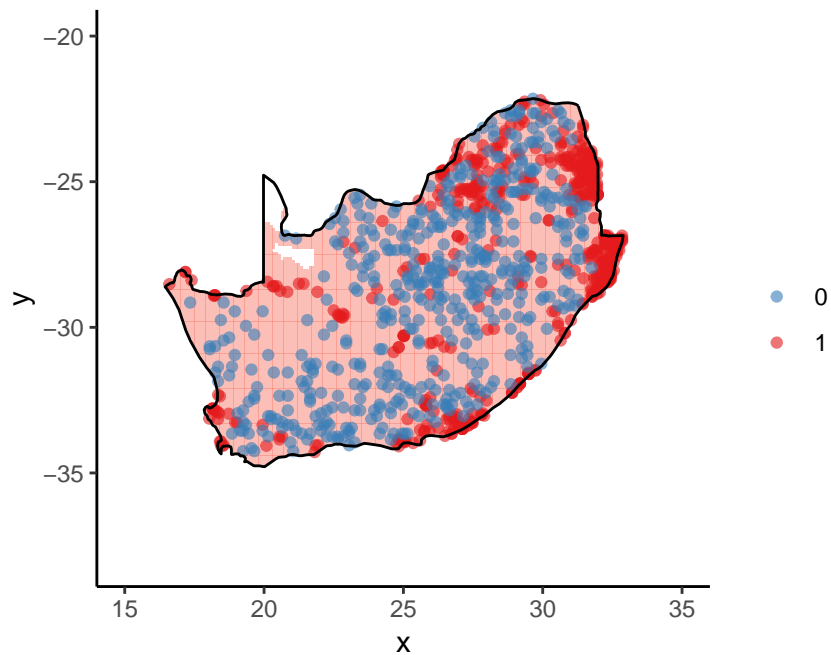

### Habitat suitability

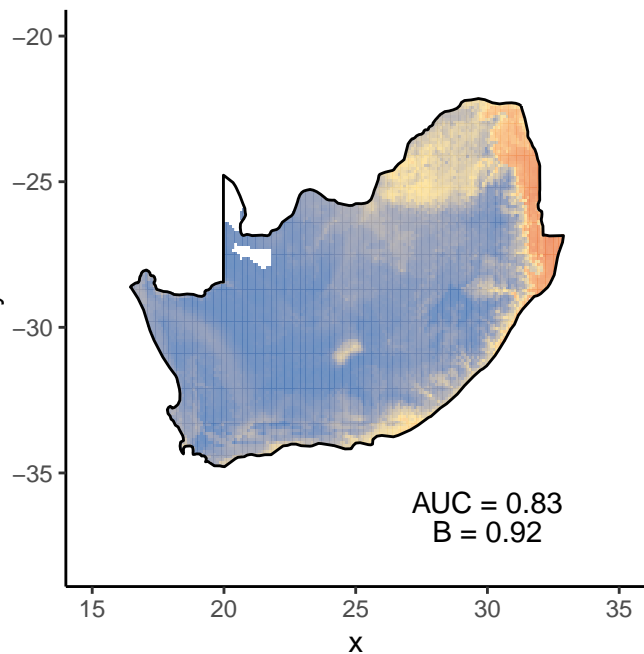

### Habitat suitability

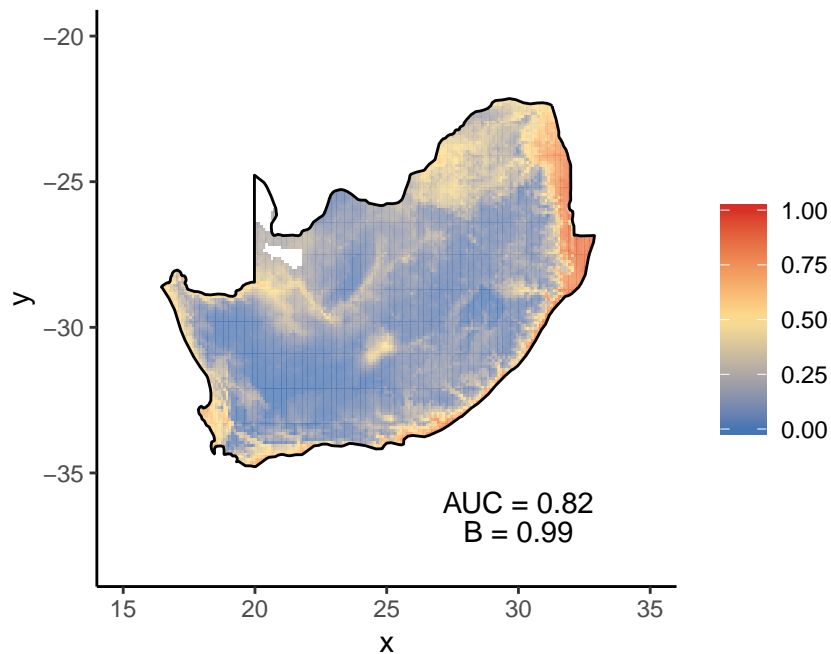

### Uncertainty

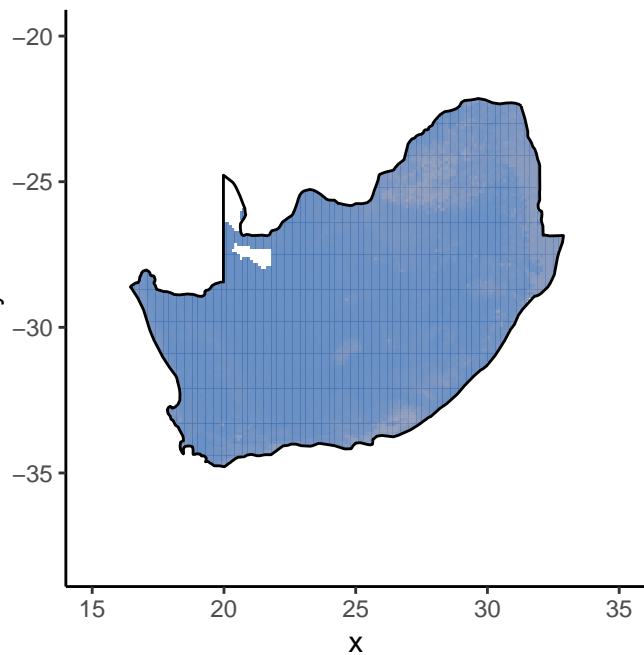

### Uncertainty

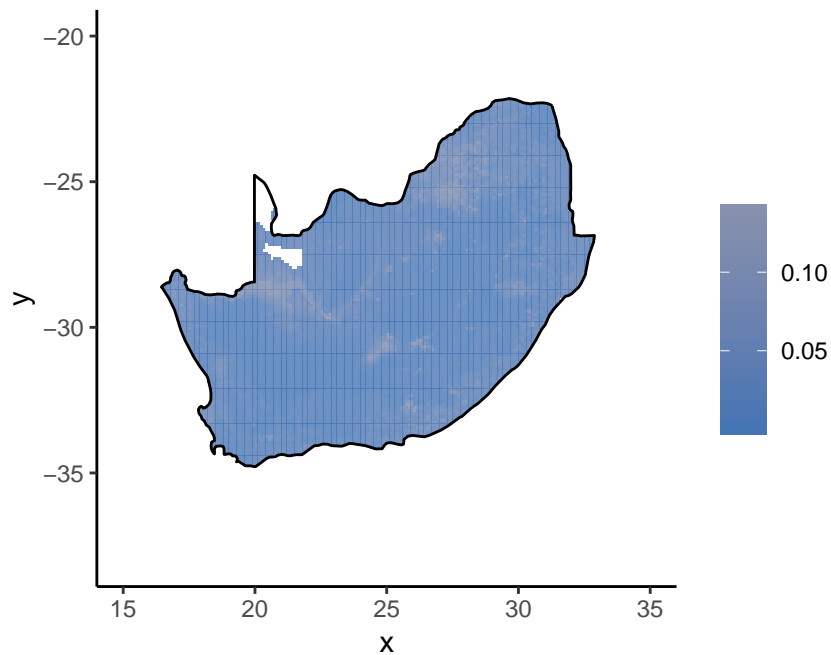

### Impala (RECENT)

Dataset

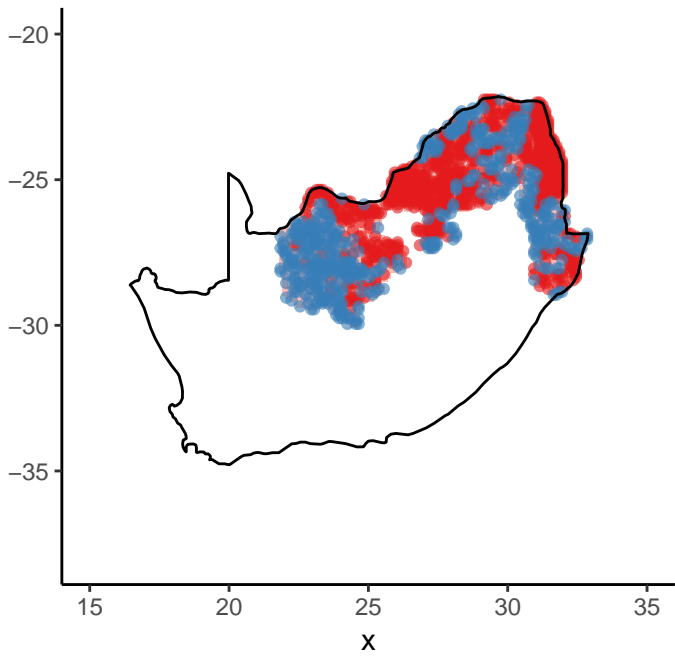

### Impala (TOTAL)

Dataset

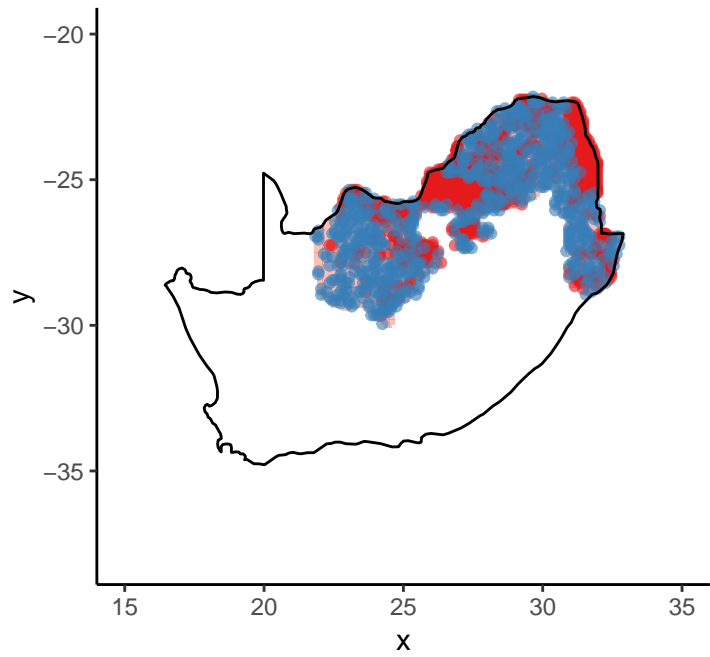

### Habitat suitability

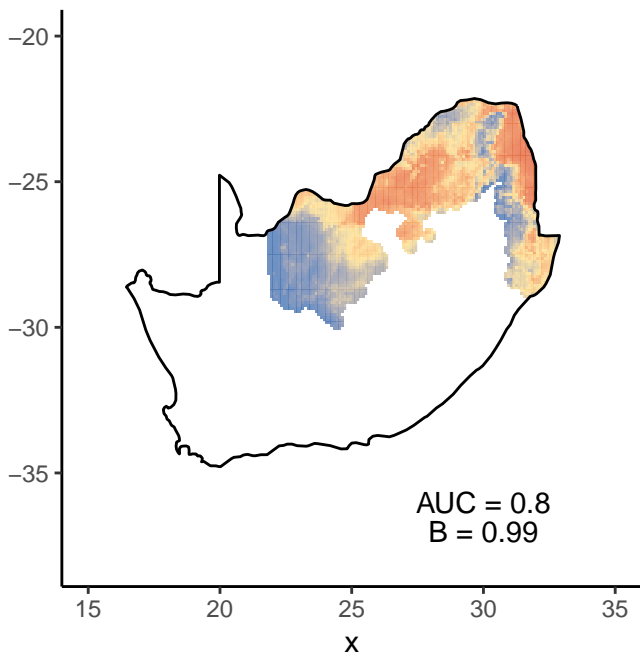

### Habitat suitability

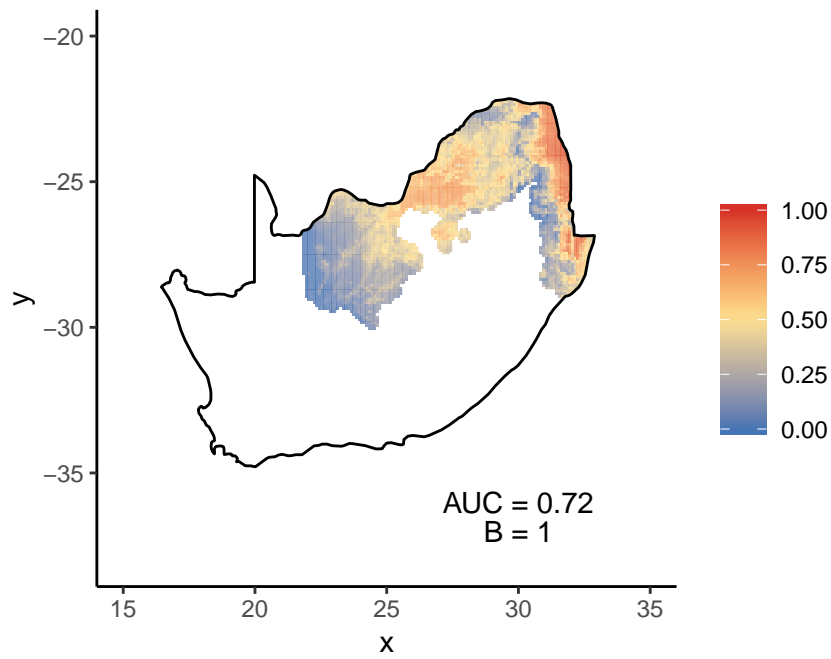

### Uncertainty

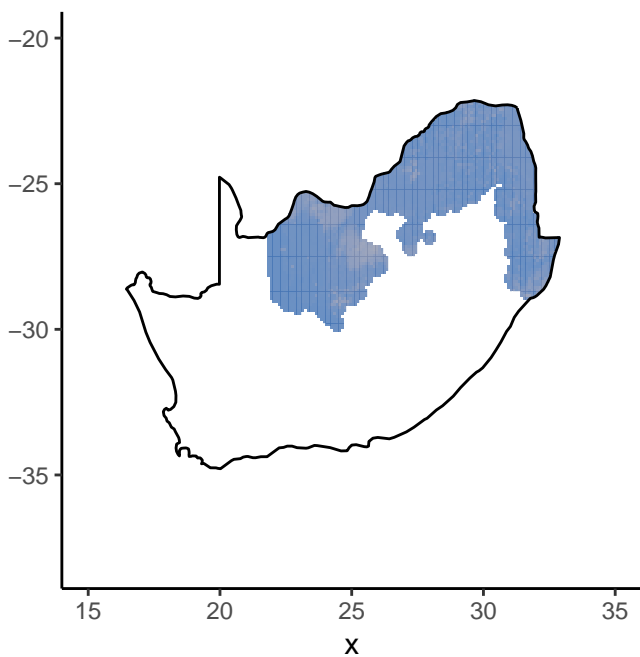

### Uncertainty

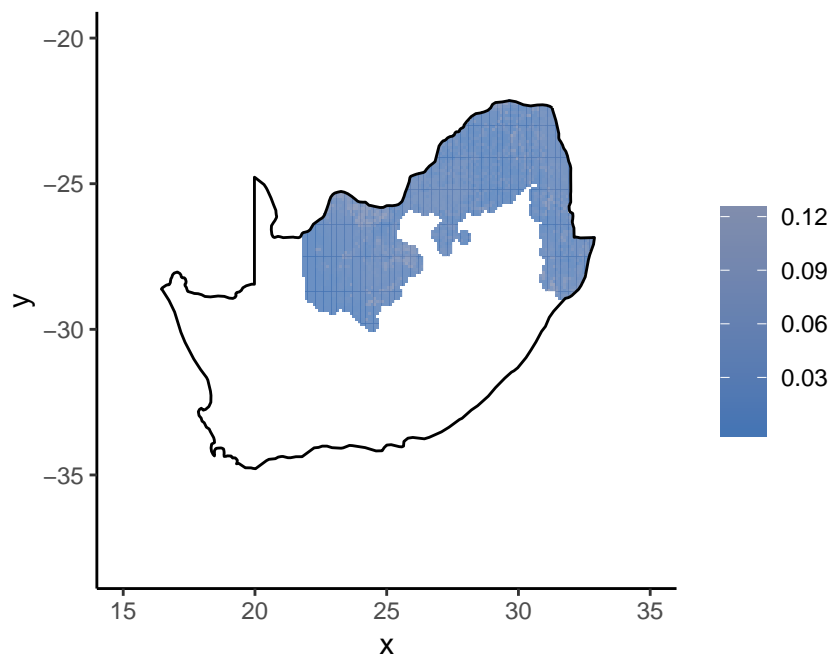

Kudu (RECENT)

Dataset

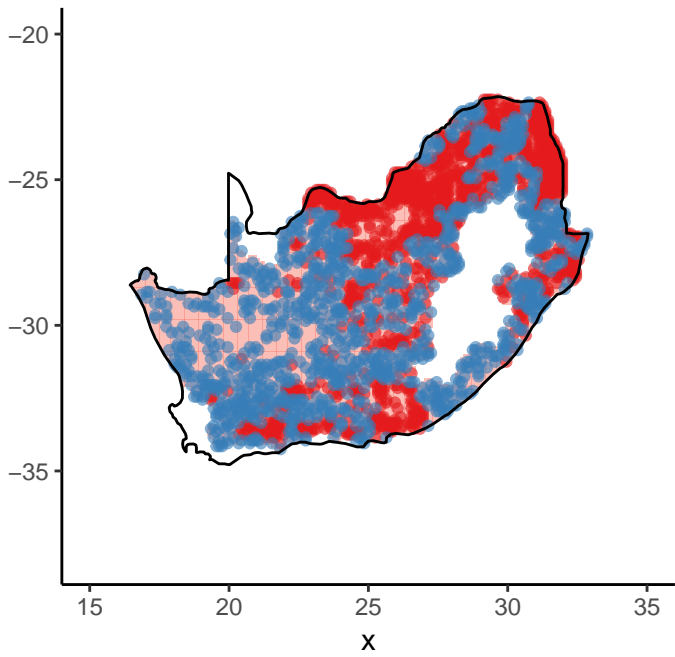

Kudu (TOTAL)

Dataset

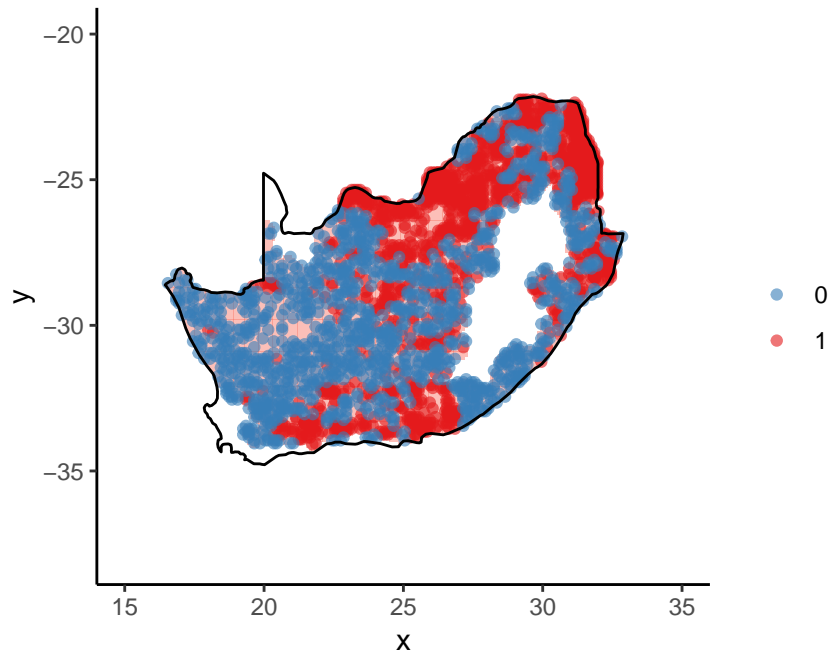

Habitat suitability

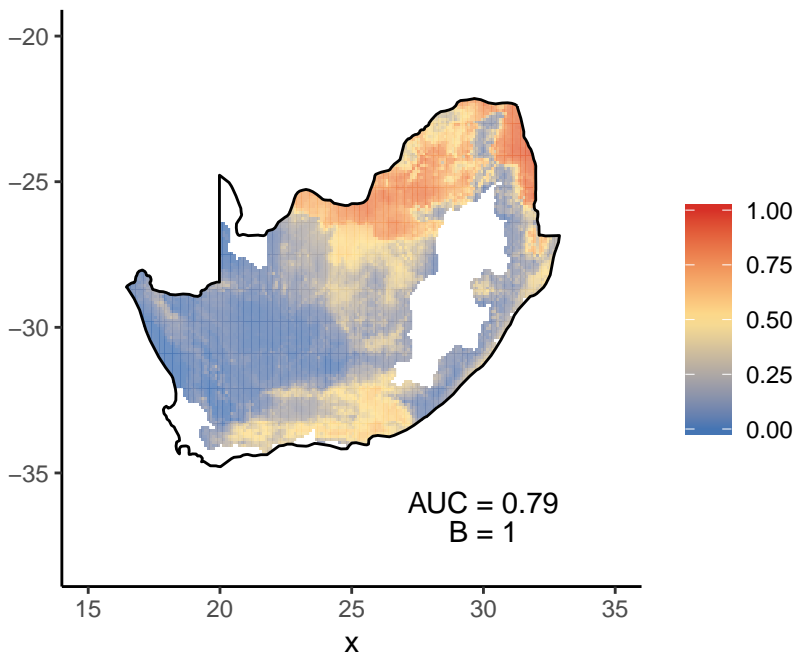

Habitat suitability

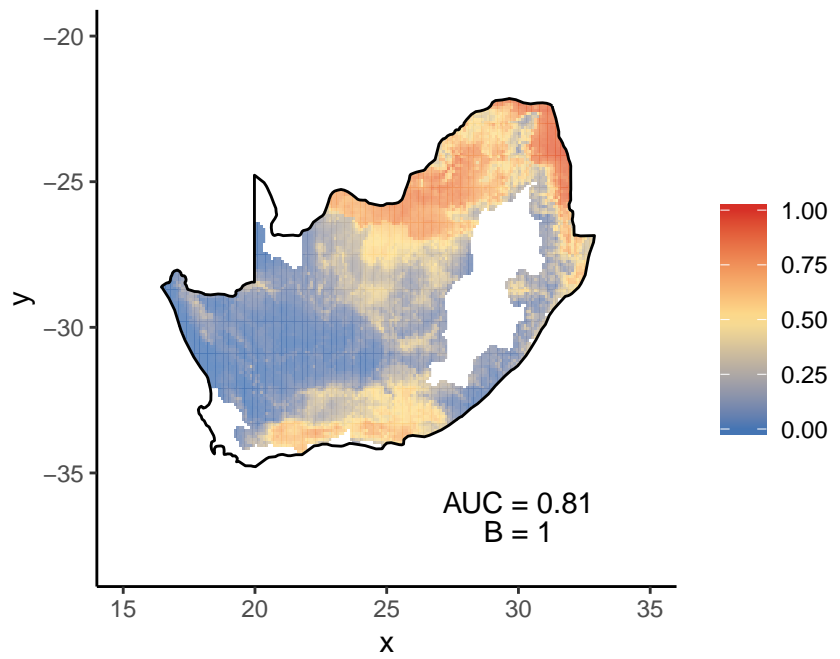

Uncertainty

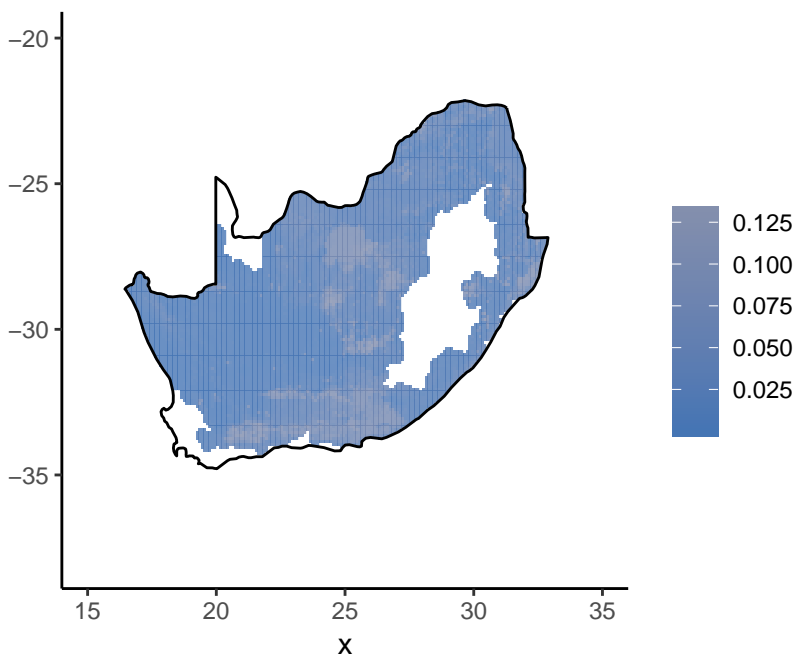

Uncertainty

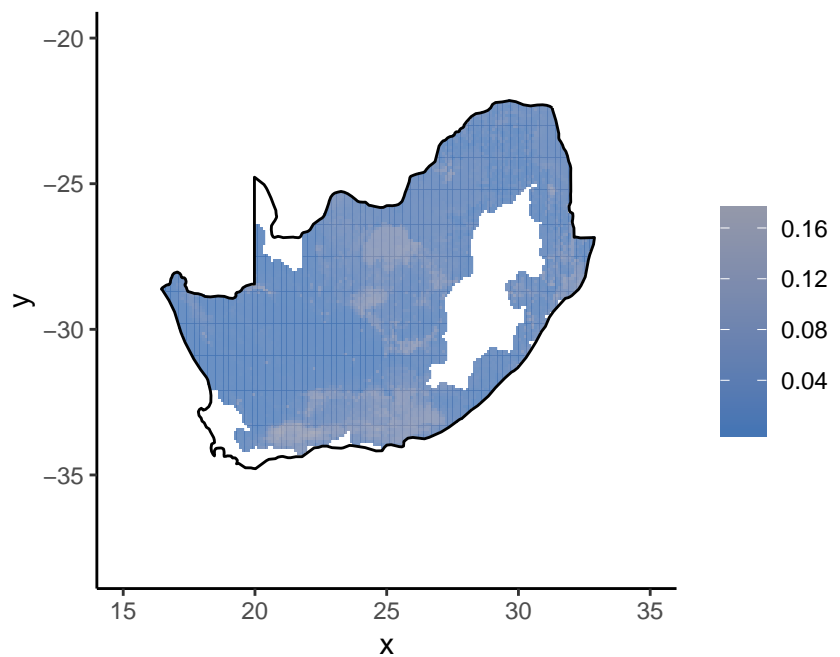

### Leopard (RECENT)

Dataset

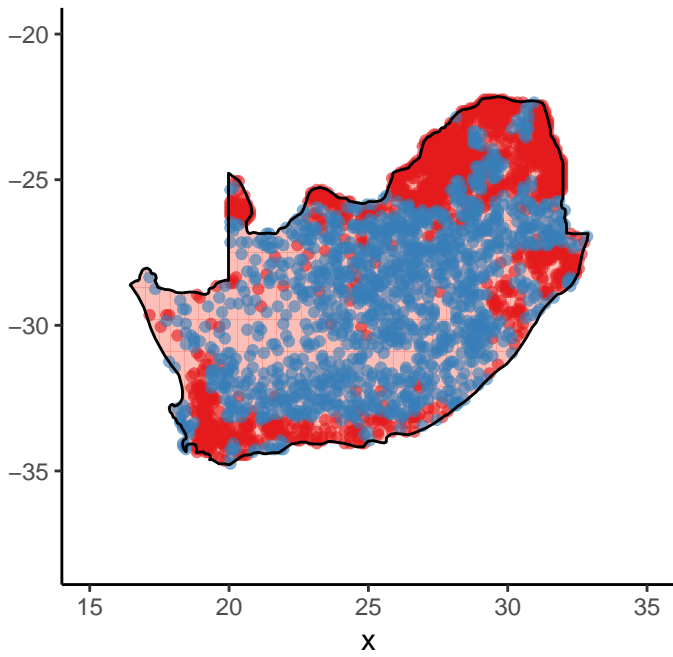

### Leopard (TOTAL)

Dataset

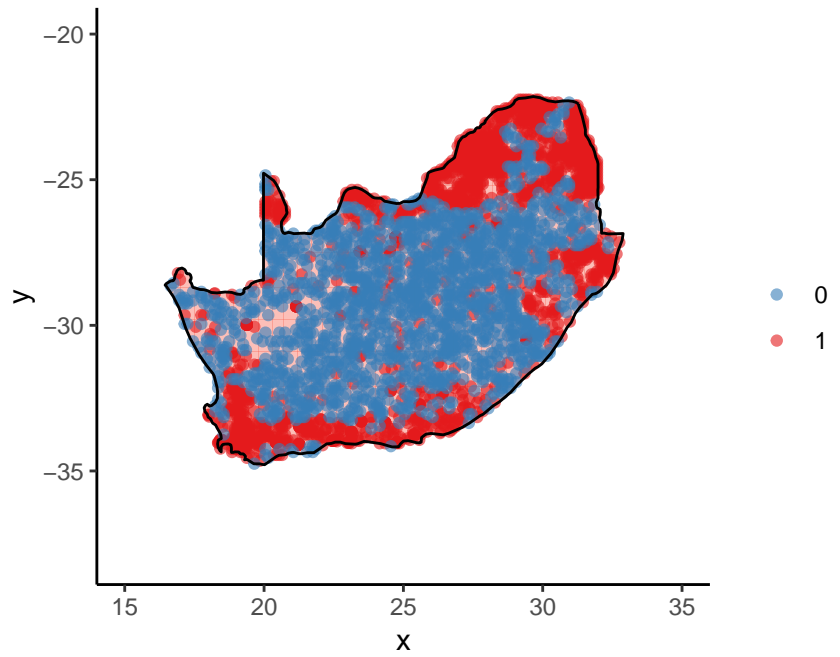

### Habitat suitability

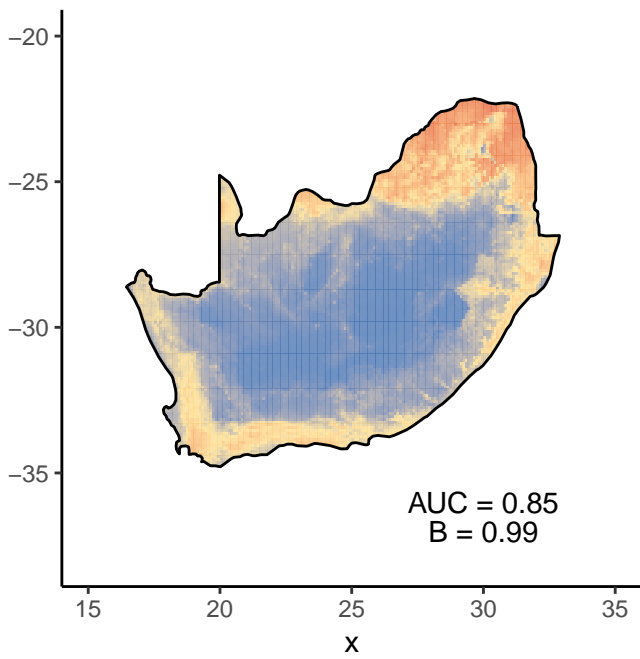

### Habitat suitability

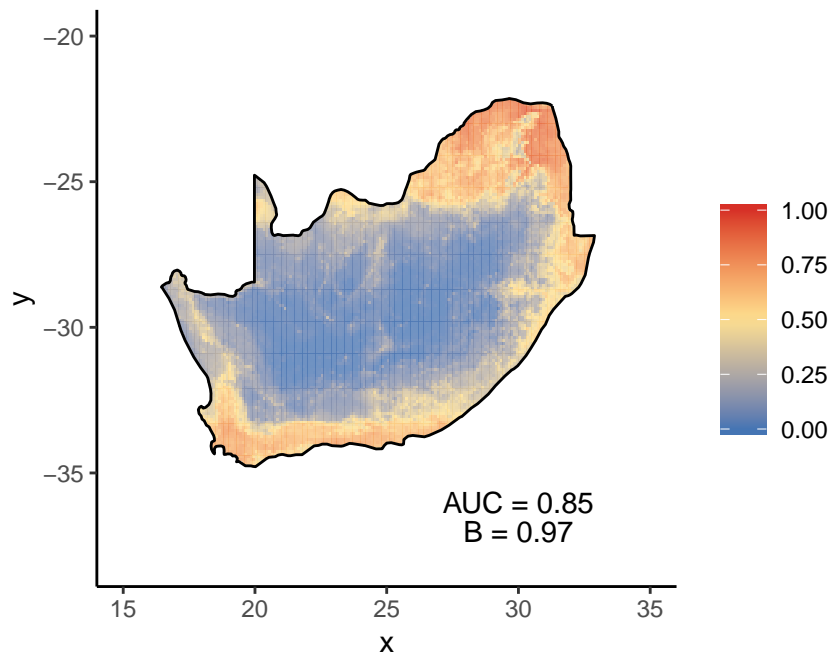

### Uncertainty

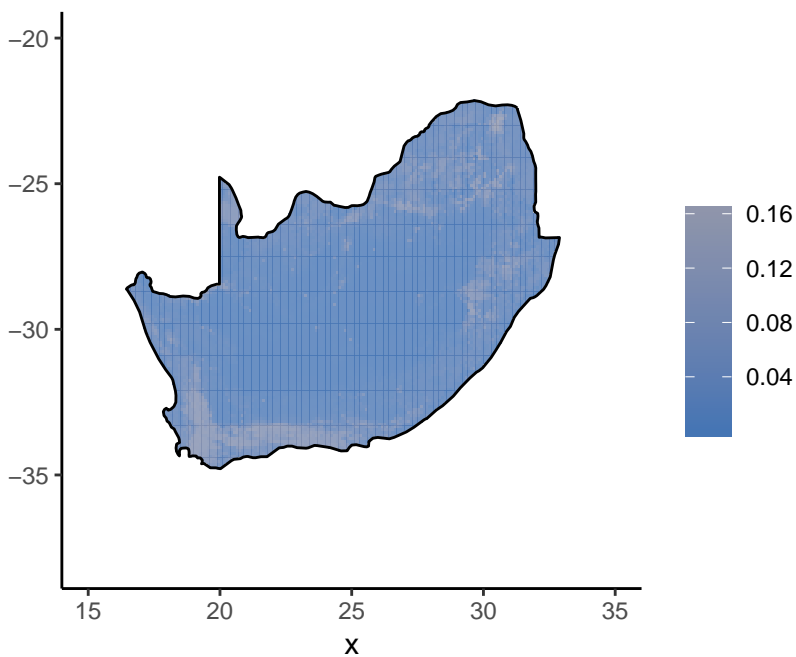

### Uncertainty

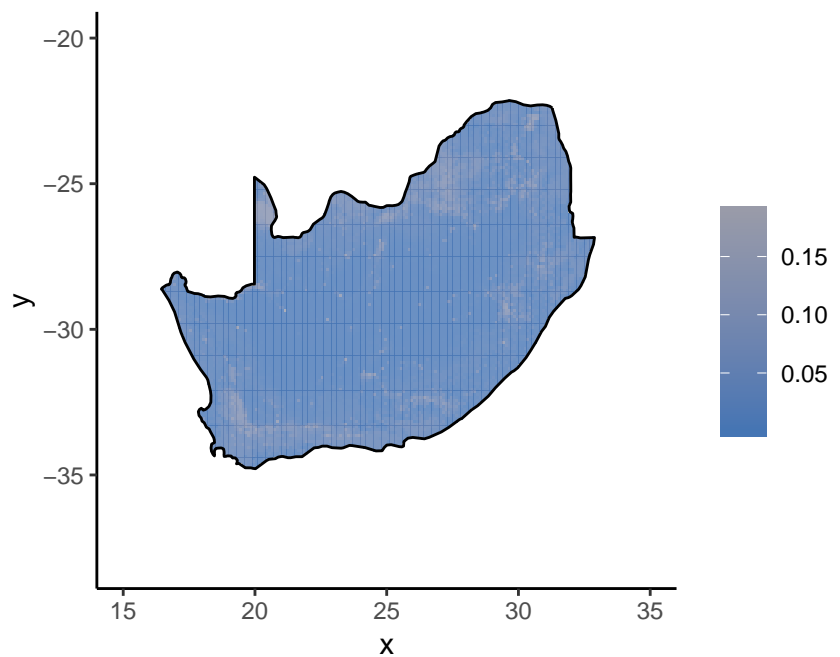

### Lion (RECENT)

Dataset

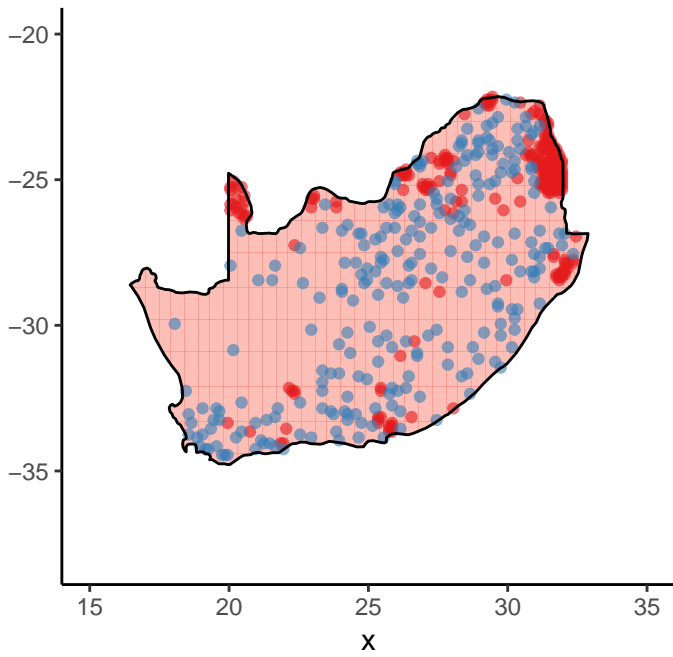

### Lion (TOTAL)

Dataset

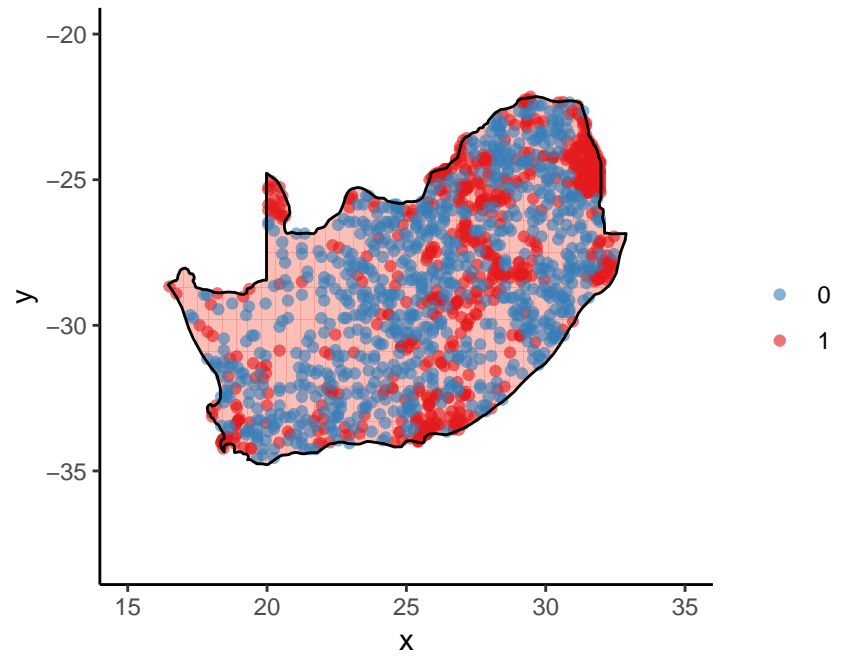

### Habitat suitability

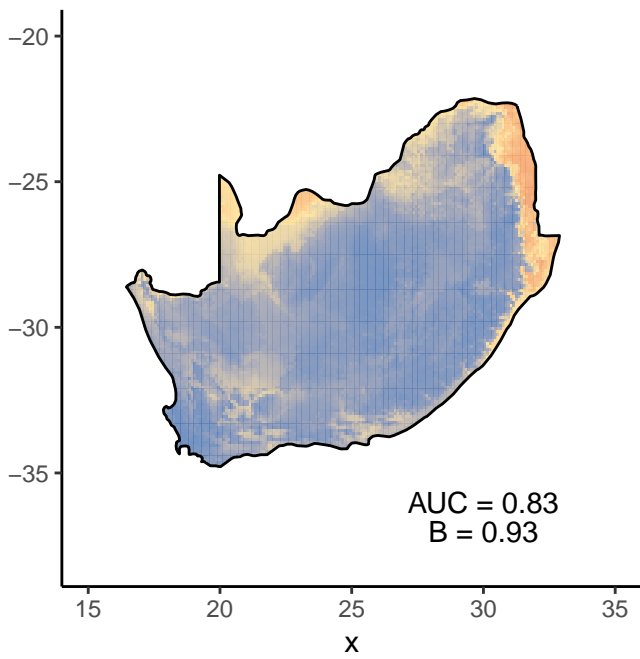

### Habitat suitability

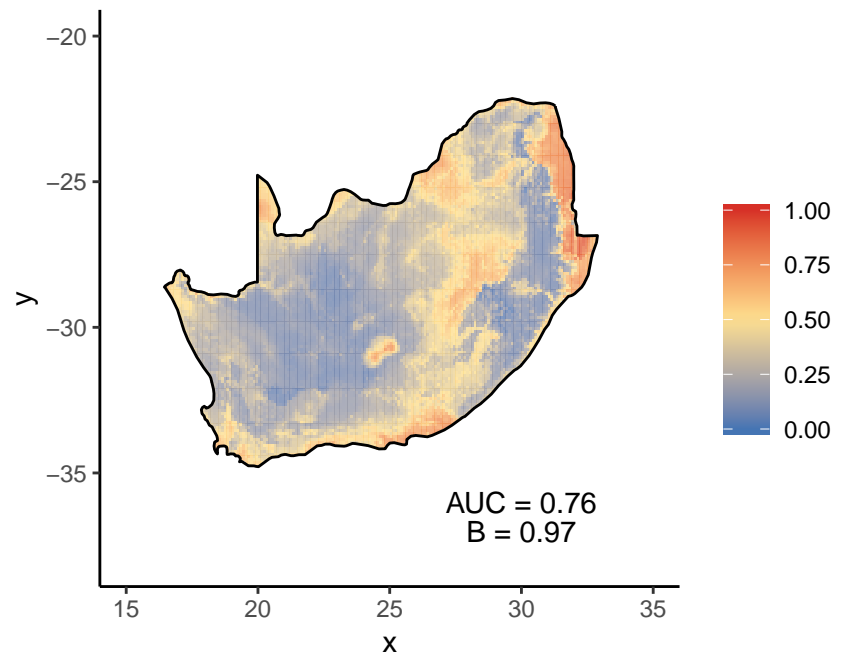

### Uncertainty

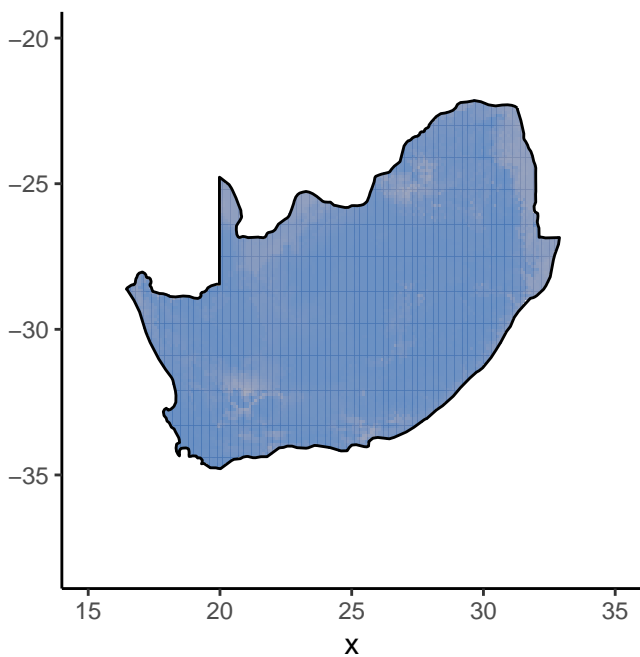

### Uncertainty

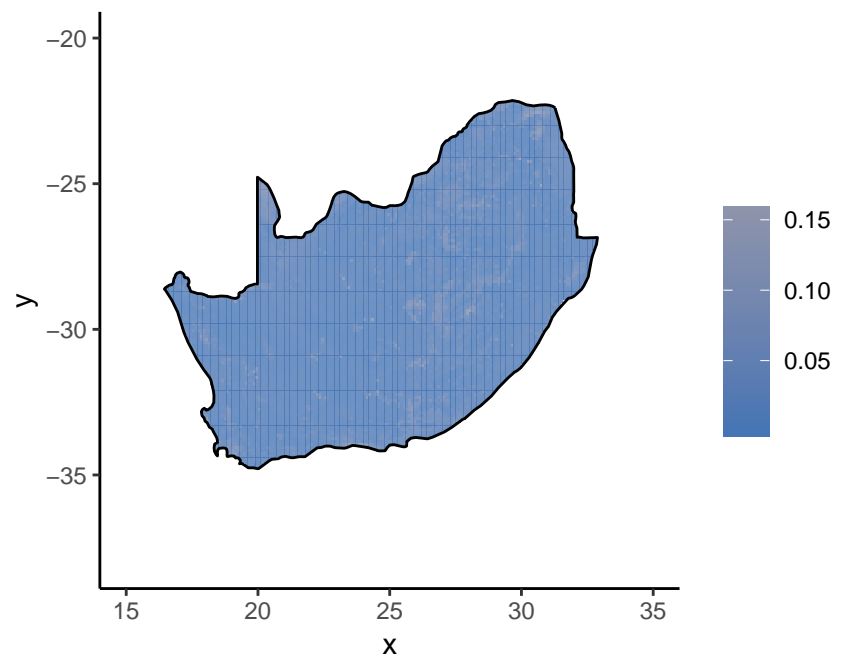

### Mountain reedbed (RECENT)

Dataset

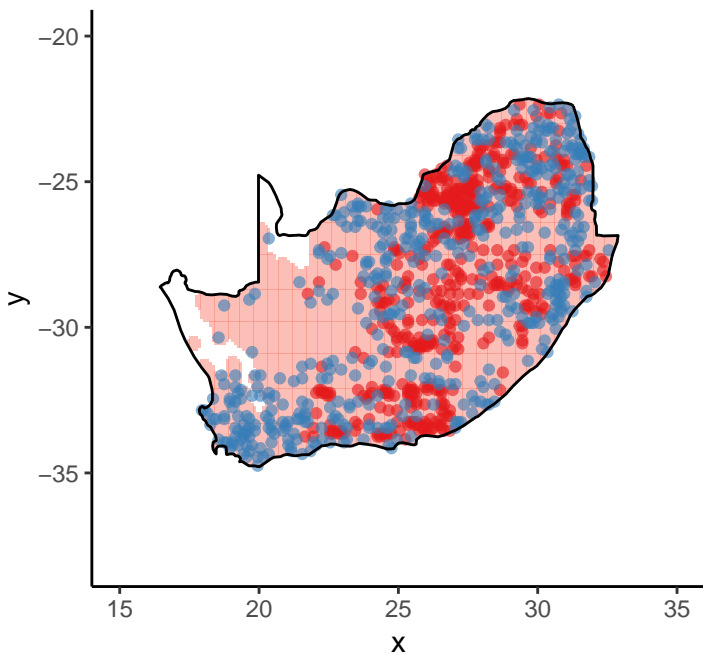

### Mountain reedbed (TOTAL)

Dataset

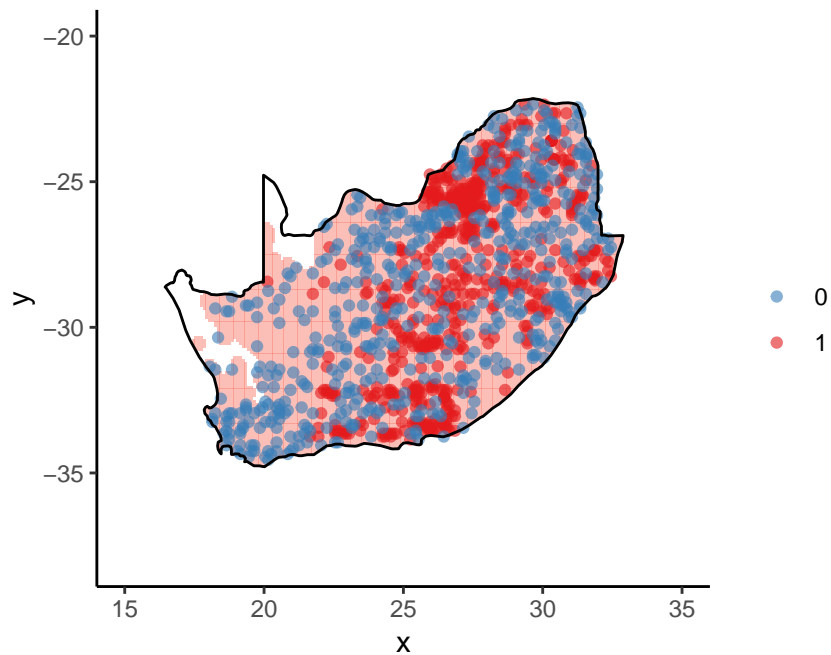

### Habitat suitability

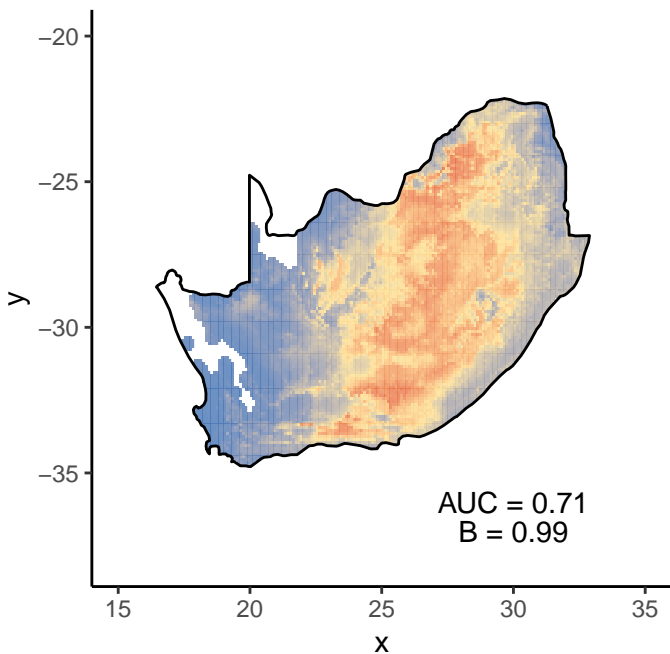

### Habitat suitability

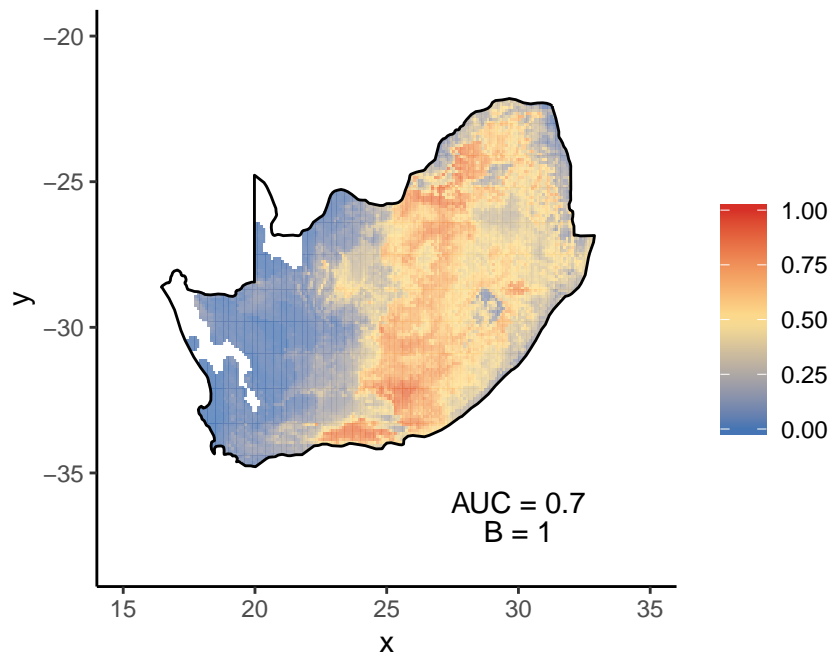

### Uncertainty

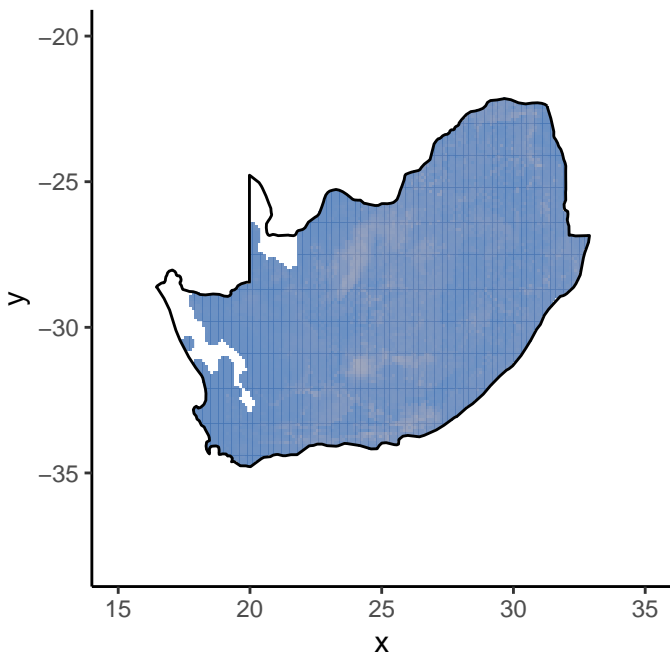

### Uncertainty

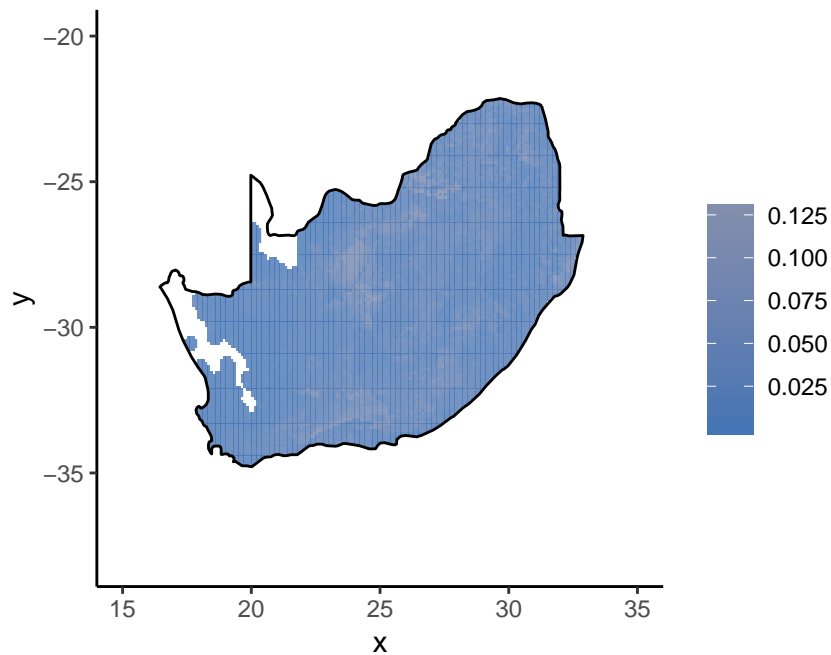

### Red hartebeest (RECENT)

Dataset

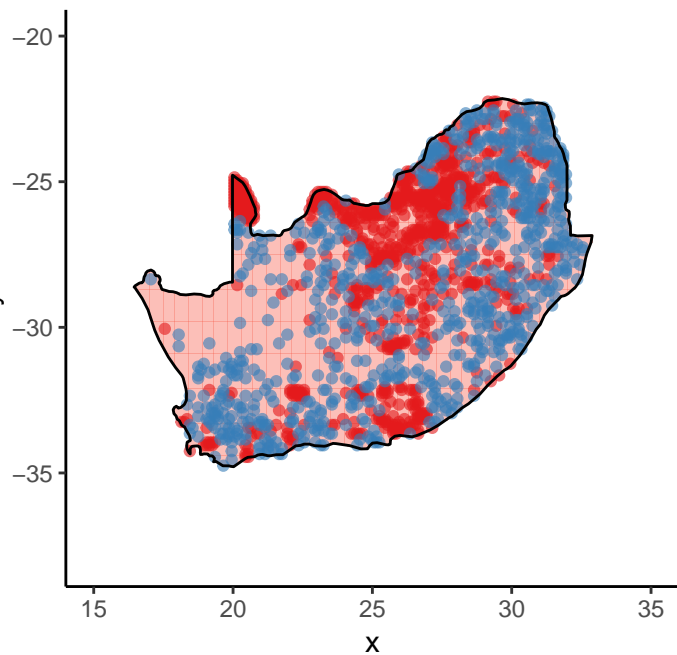

### Red hartebeest (TOTAL)

Dataset

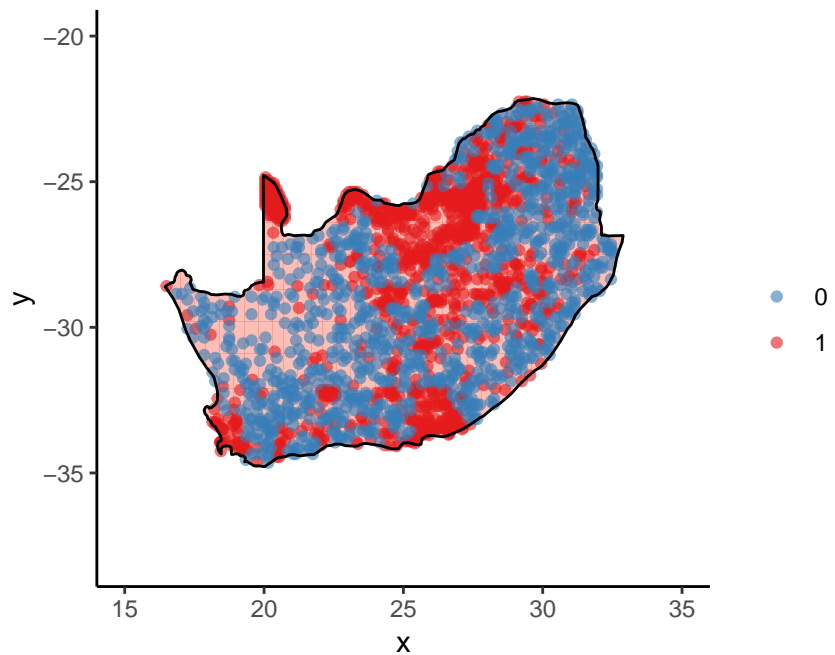

### Habitat suitability

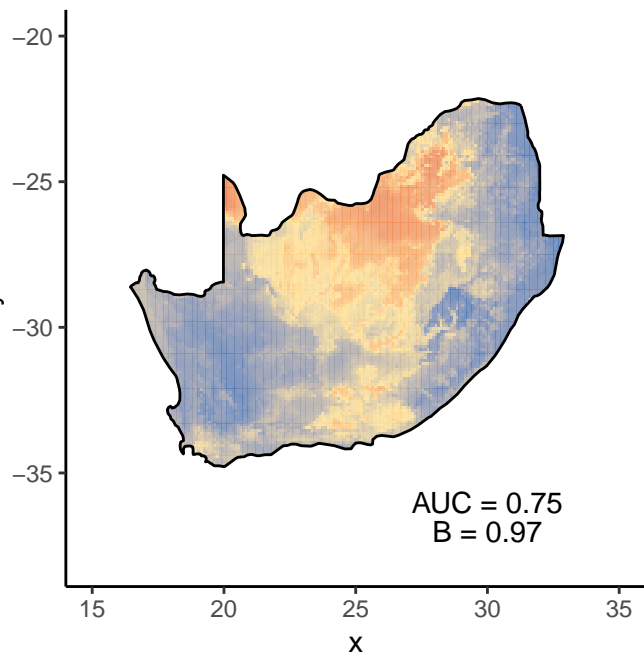

### Habitat suitability

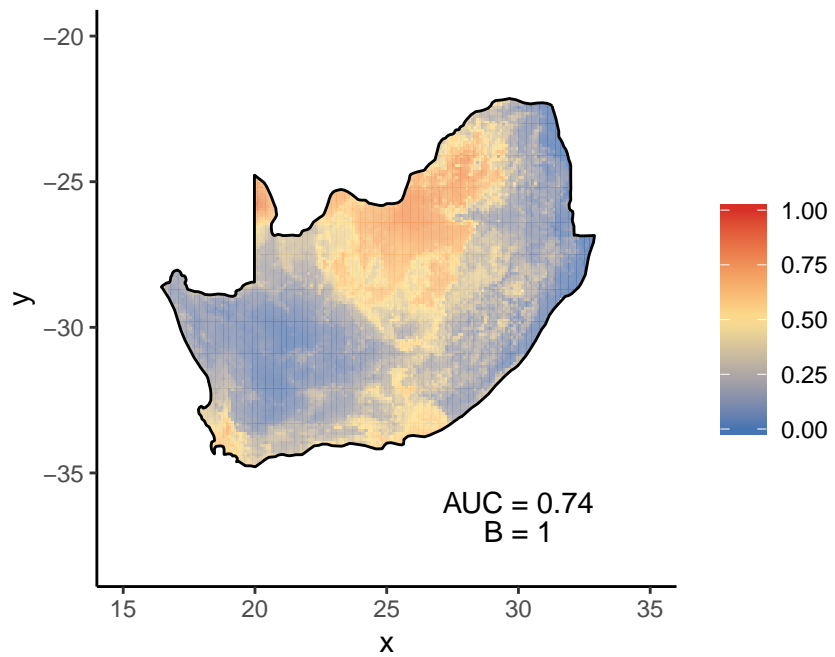

### Uncertainty

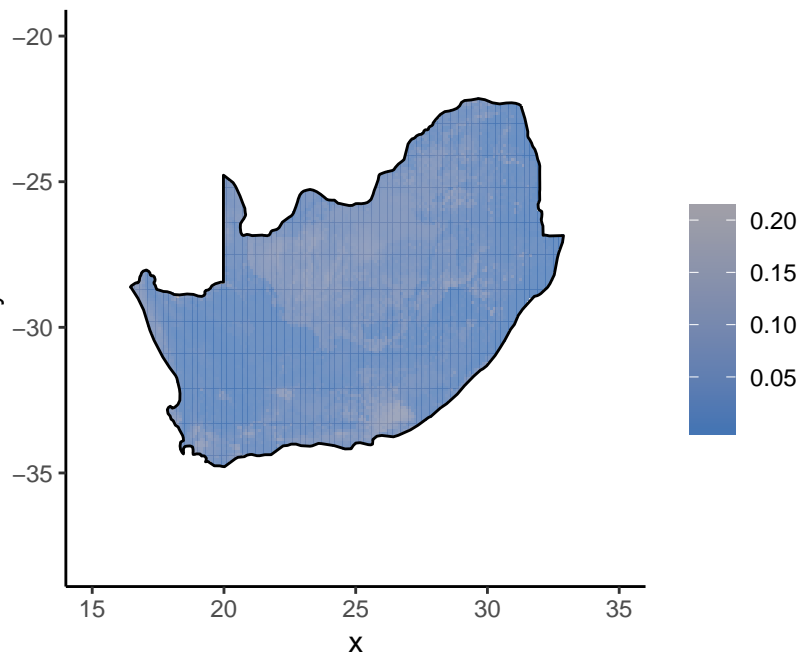

### Uncertainty

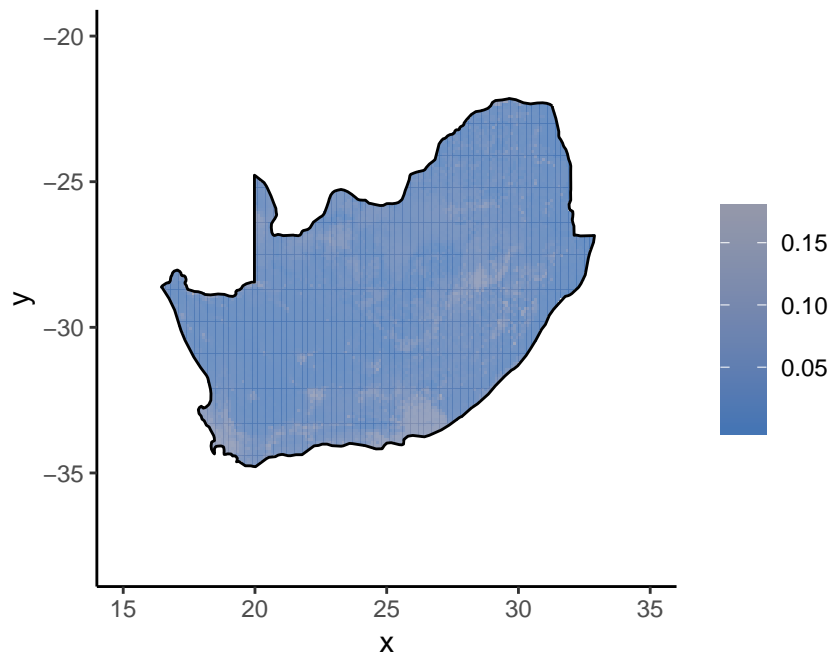



### Roan (RECENT)

Dataset

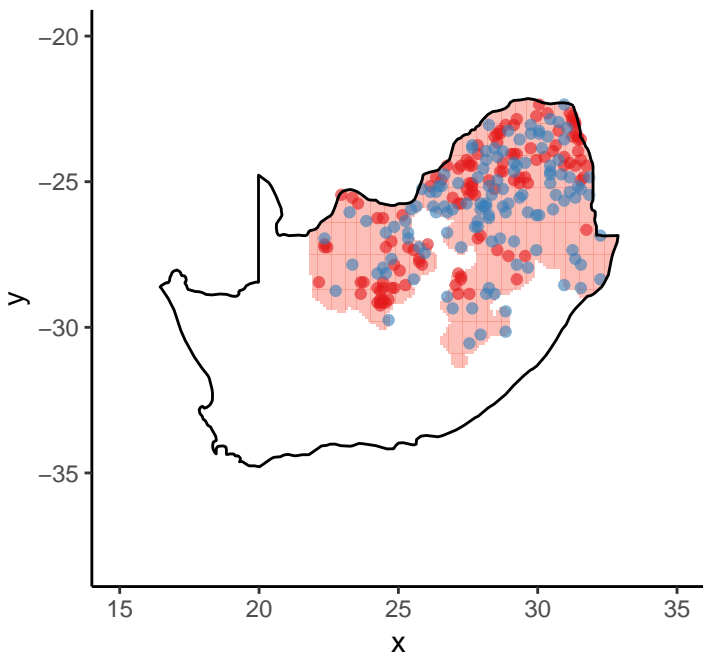

### Roan (TOTAL)

Dataset

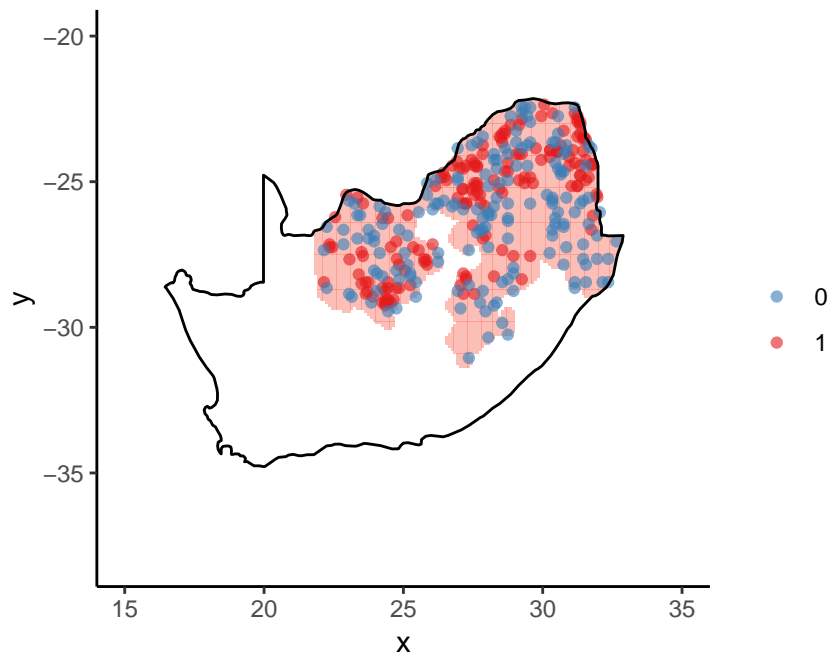

### Habitat suitability

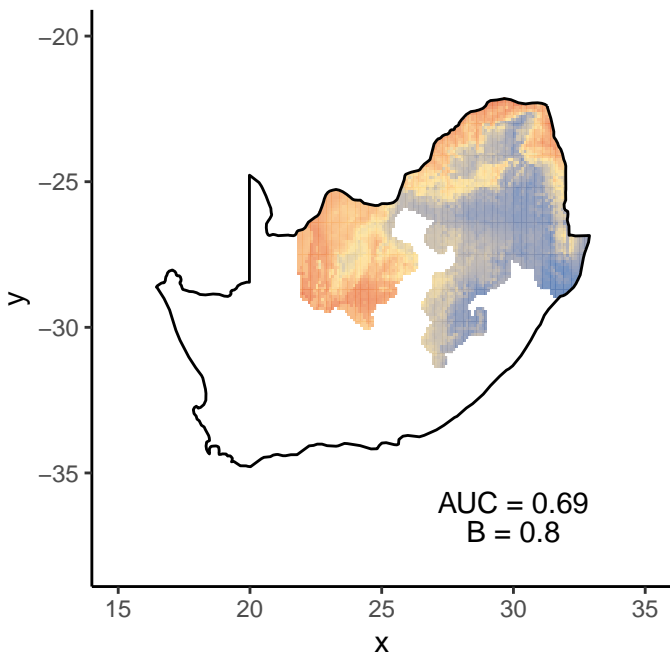

### Habitat suitability

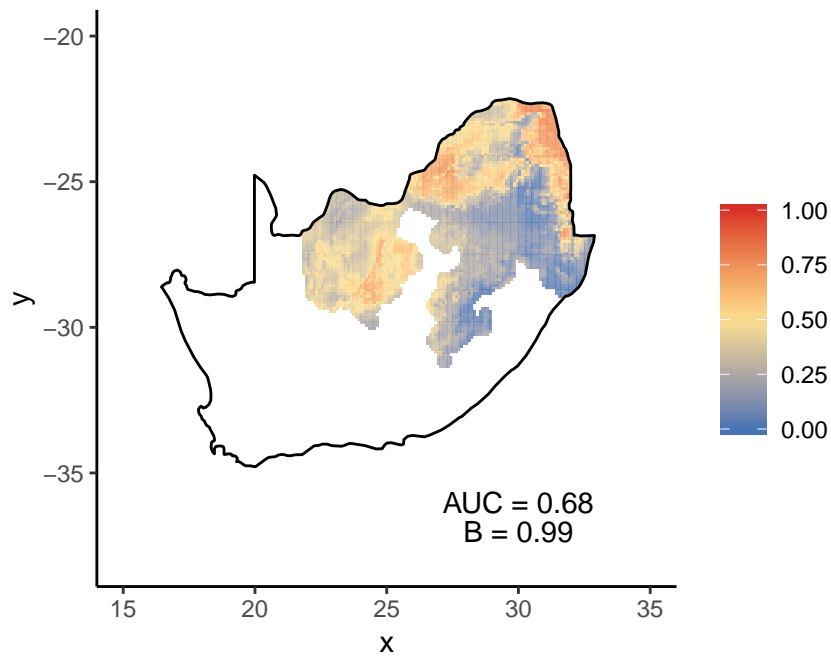

### Uncertainty

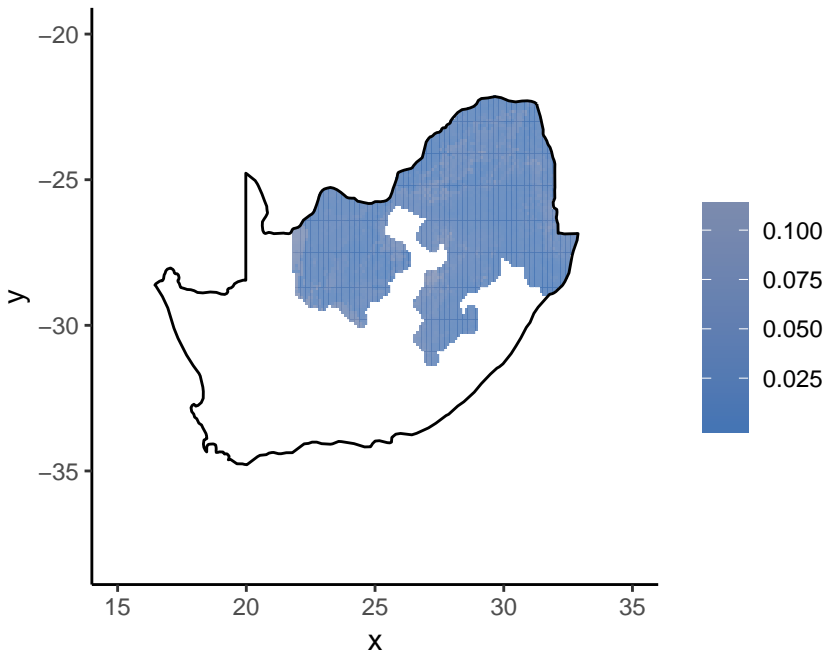

### Uncertainty

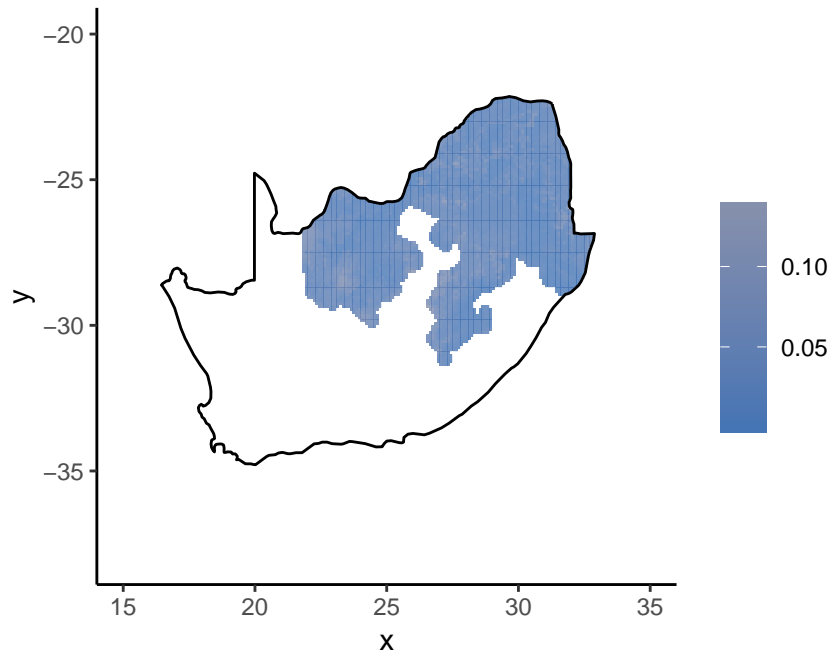

### Sable (RECENT)

Dataset

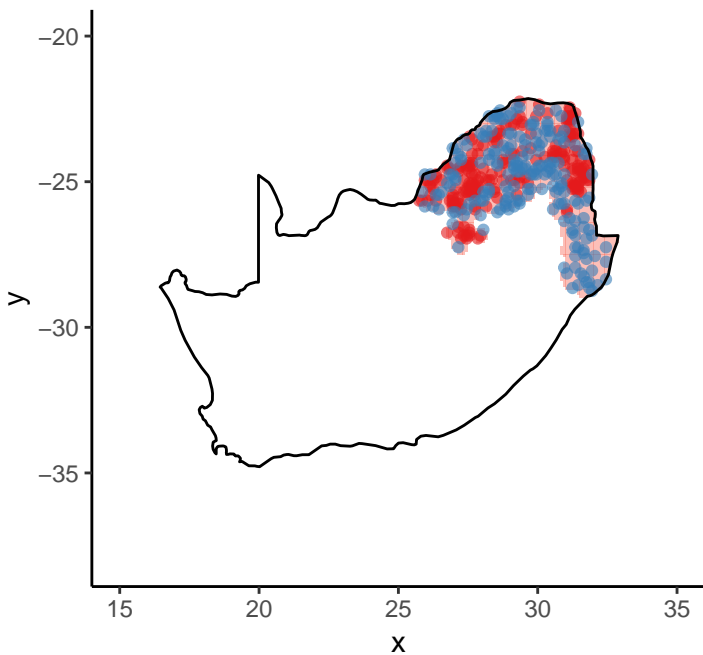

### Sable (TOTAL)

Dataset

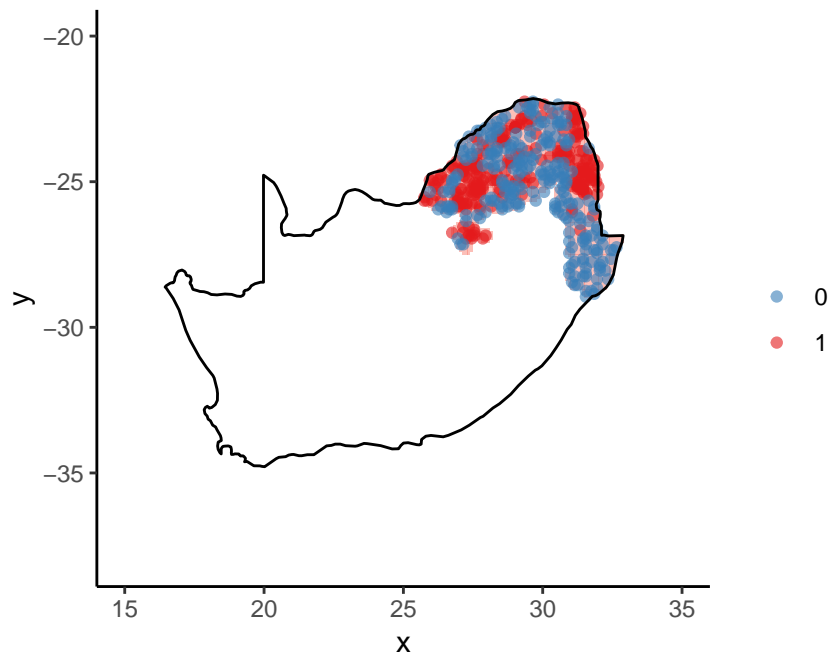

### Habitat suitability

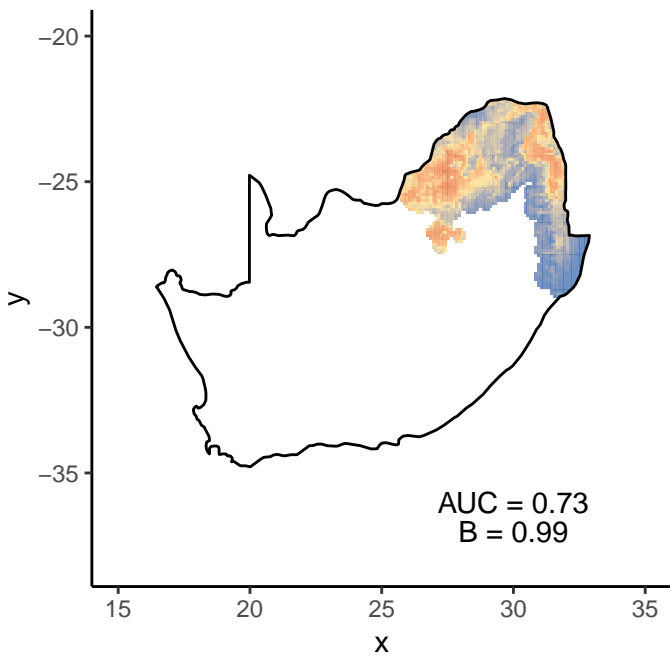

### Habitat suitability

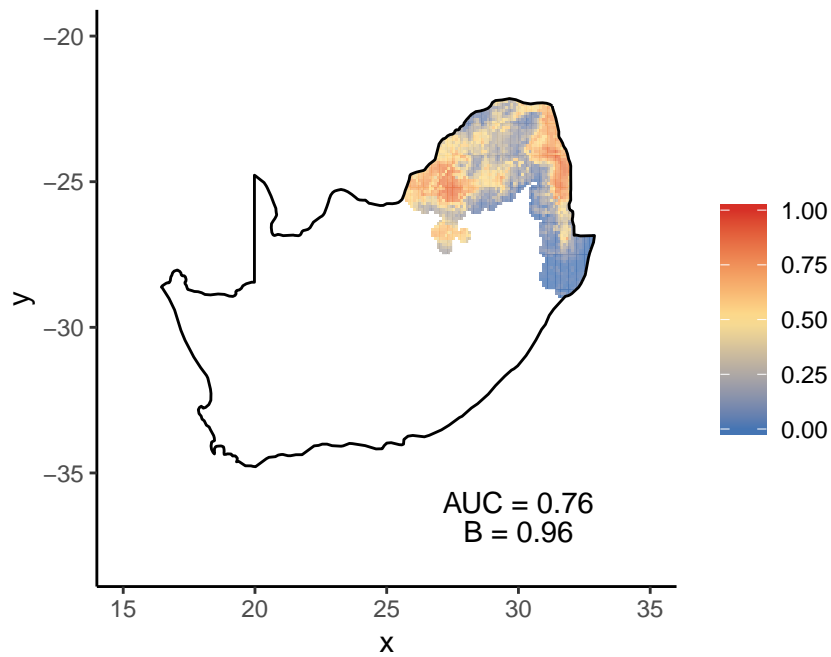

### Uncertainty

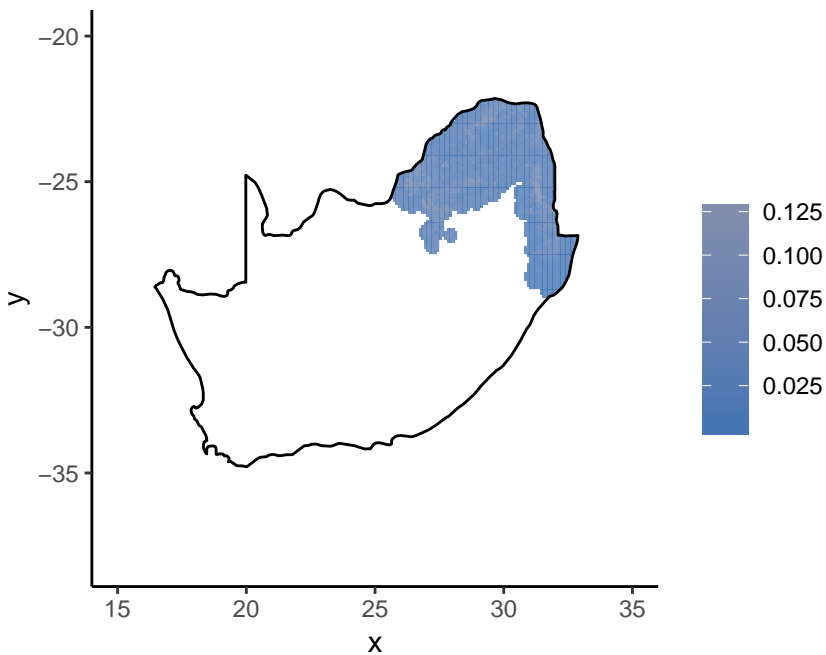

### Uncertainty

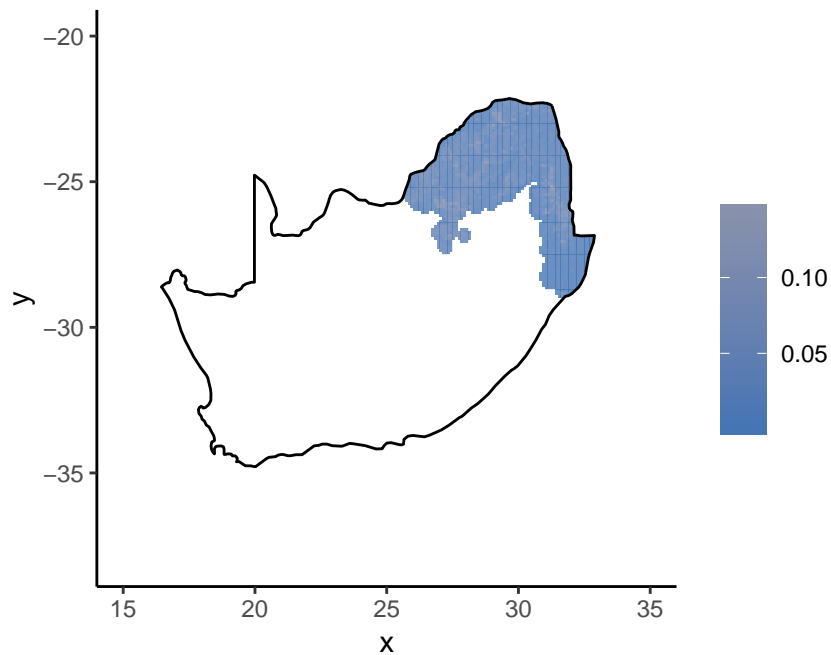

### Southern reedbank (RECENT)

Dataset

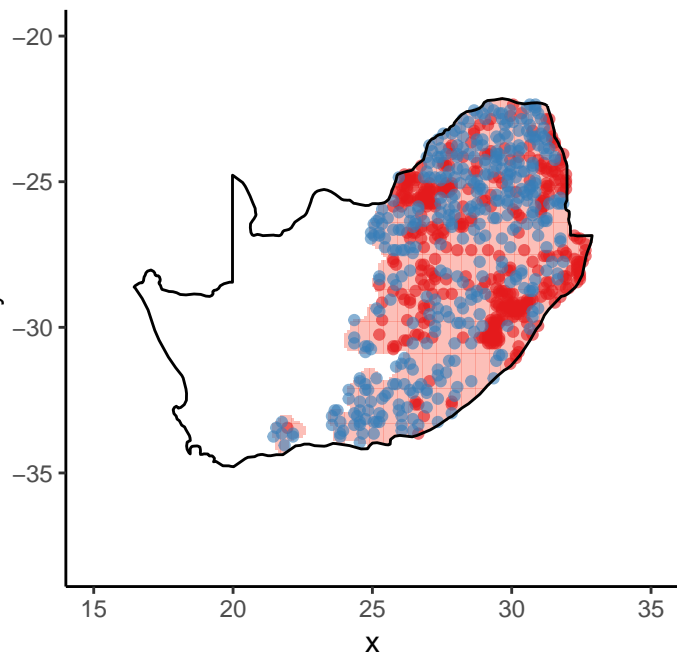

### Southern reedbank (TOTAL)

Dataset

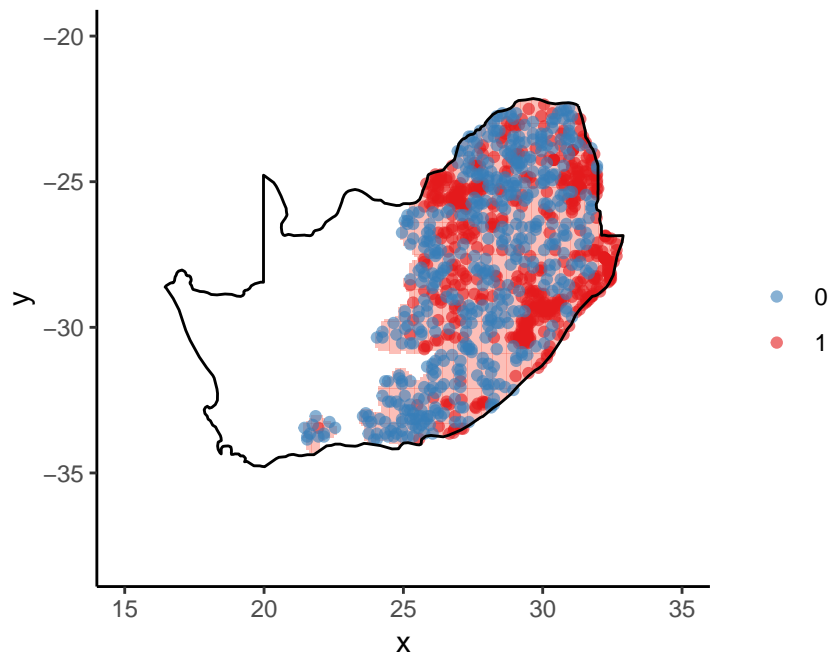

### Habitat suitability

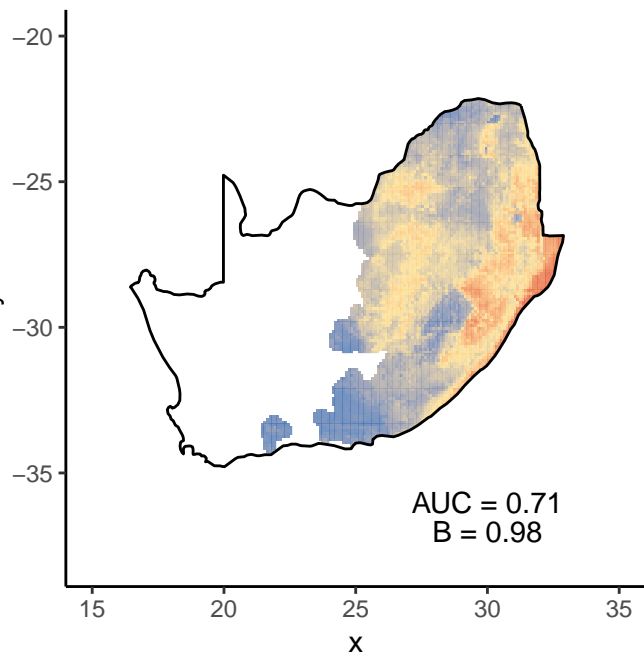

### Habitat suitability

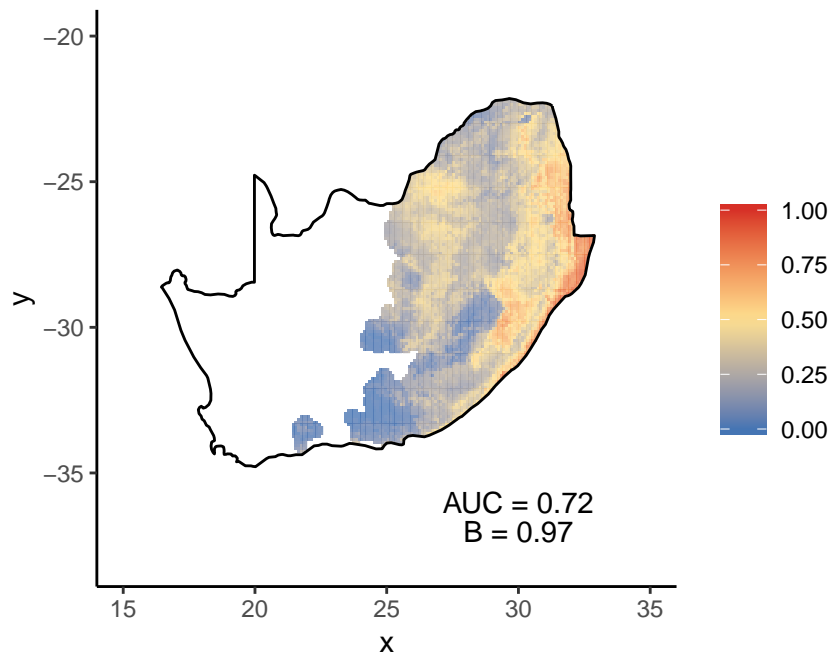

### Uncertainty

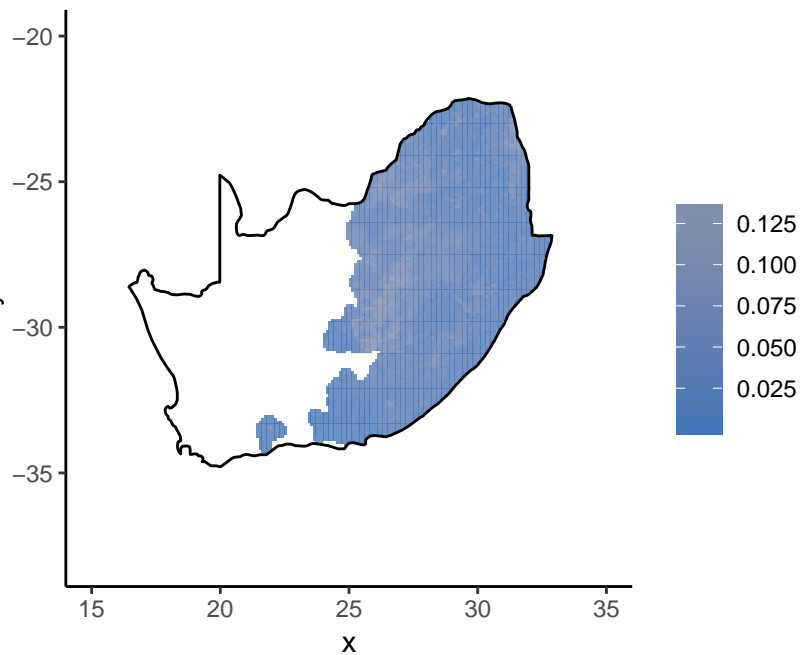

### Uncertainty

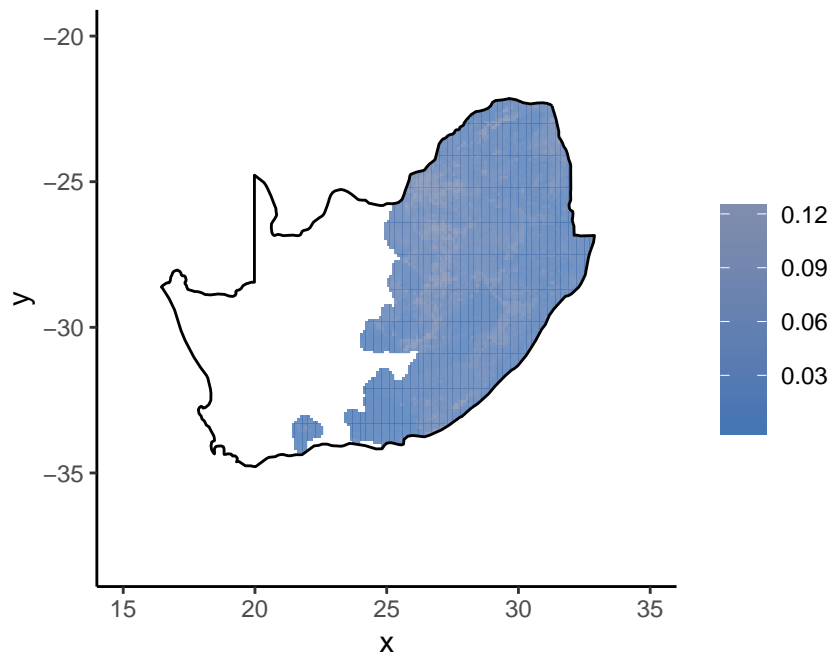

### Spotted hyaena (RECENT)

Dataset

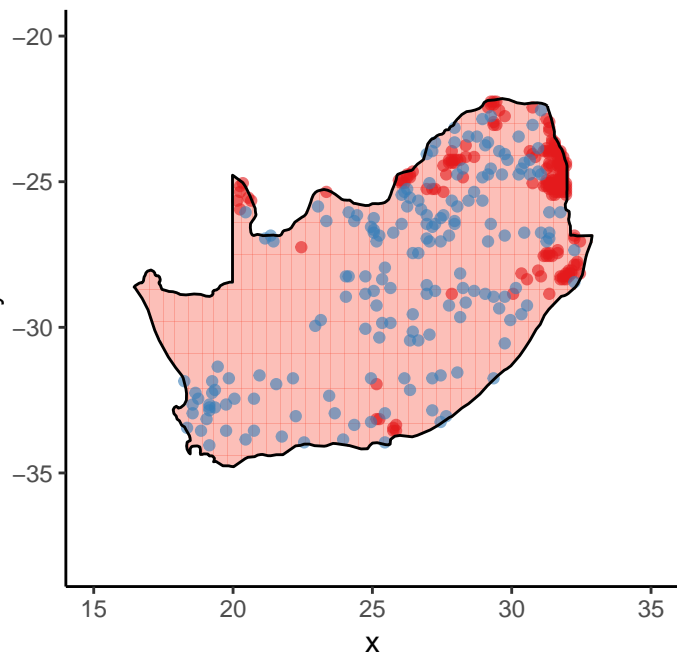

### Spotted hyaena (TOTAL)

Dataset

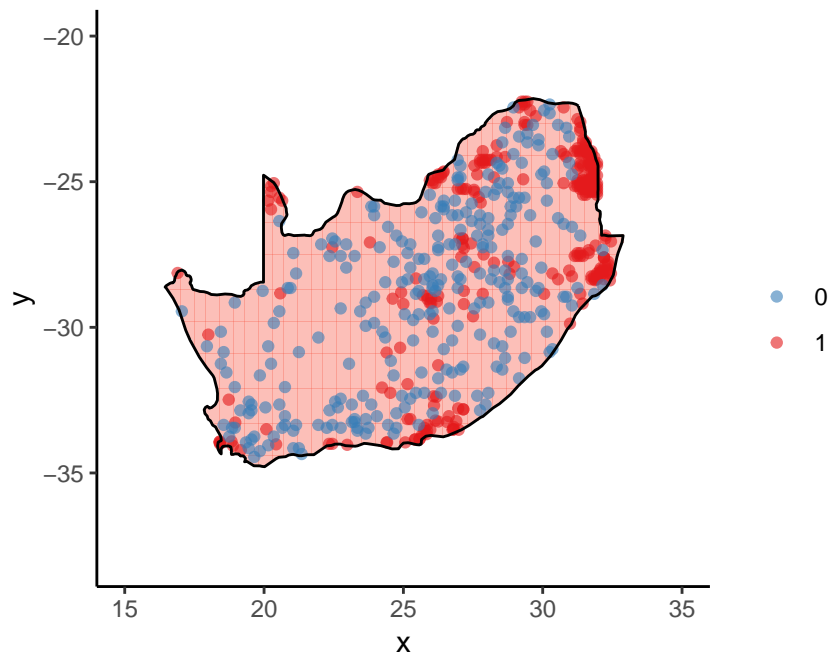

### Habitat suitability

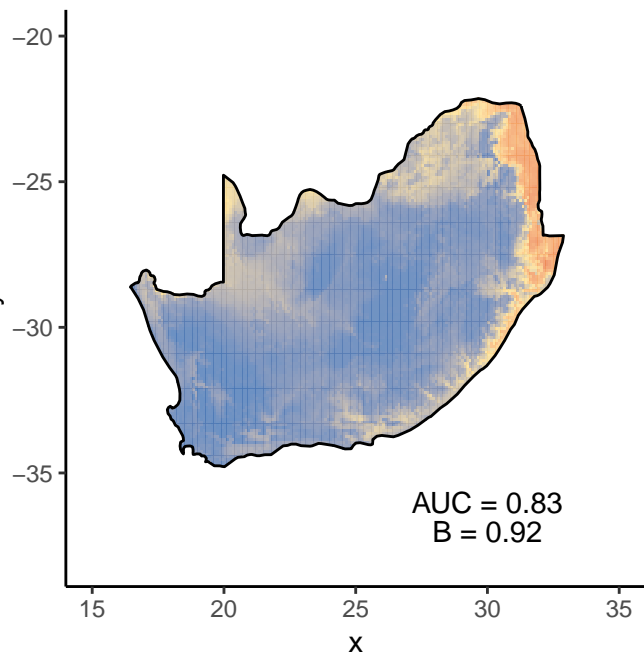

### Habitat suitability

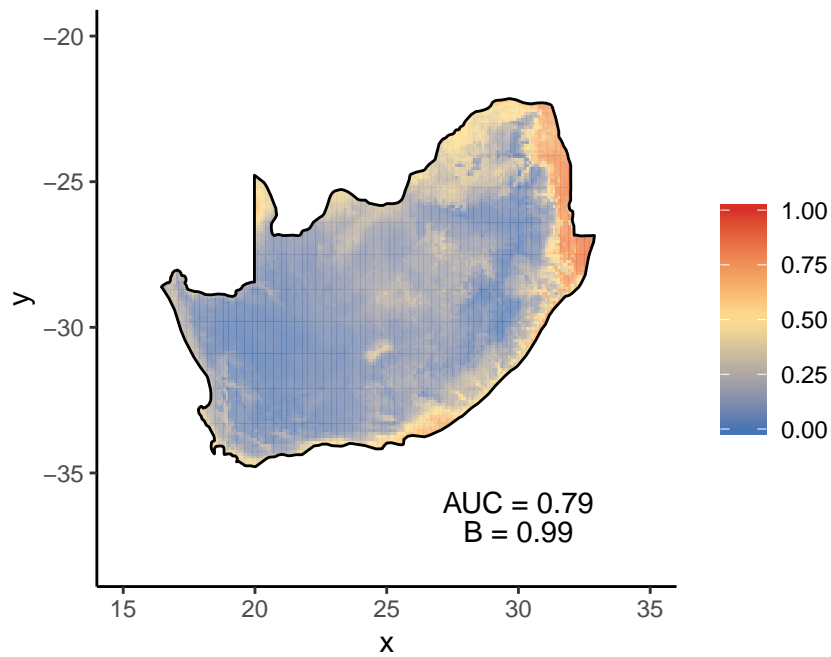

### Uncertainty

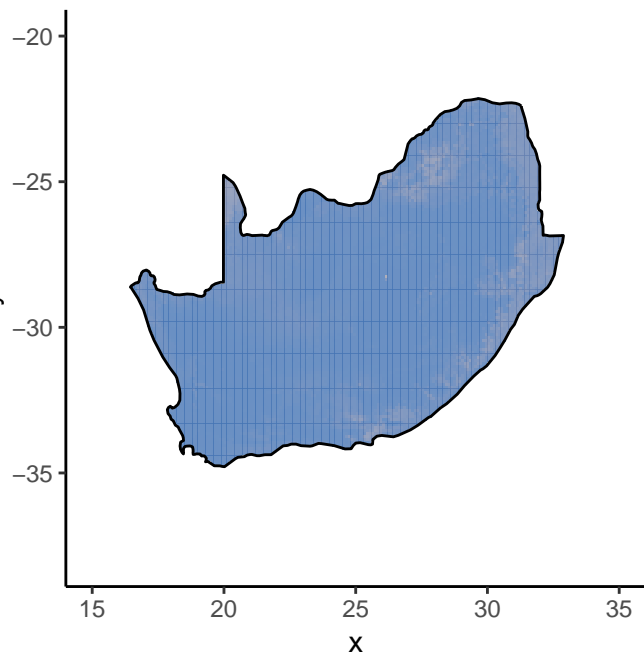

### Uncertainty

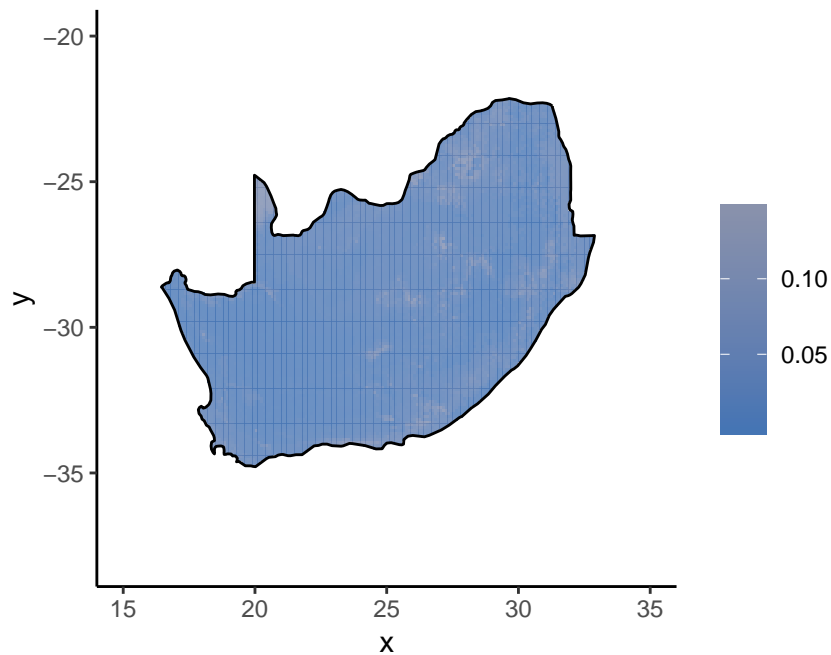

### Springbok (RECENT)

Dataset

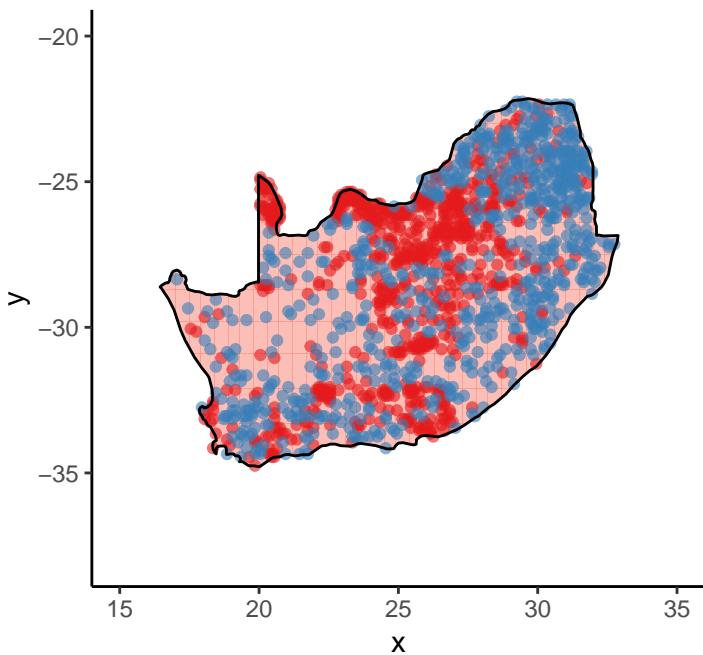

### Springbok (TOTAL)

Dataset

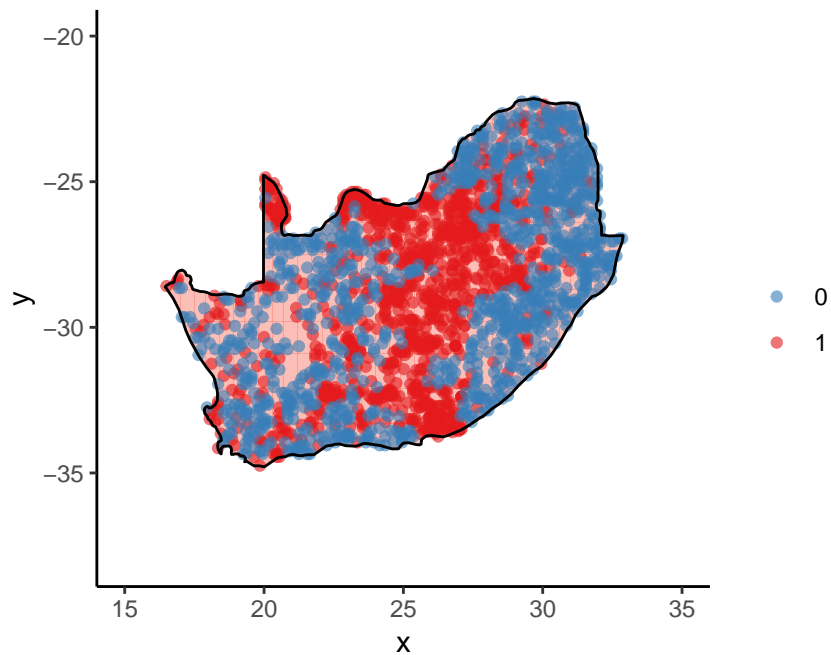

### Habitat suitability

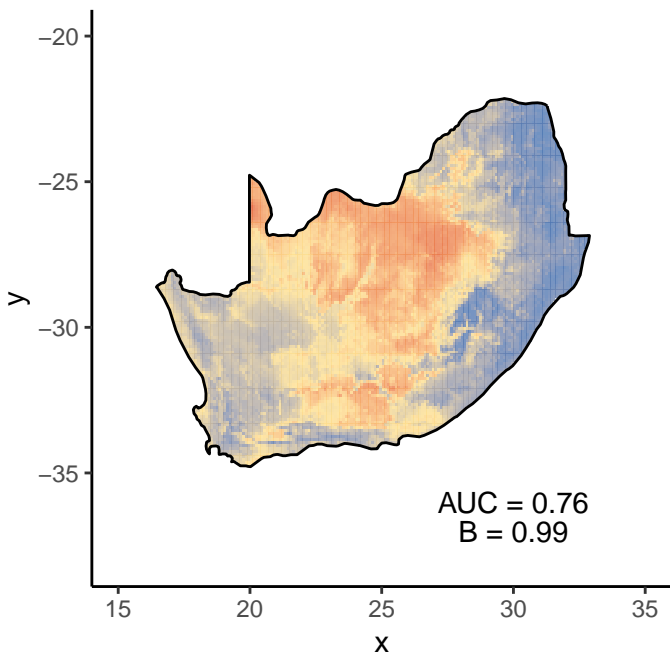

### Habitat suitability

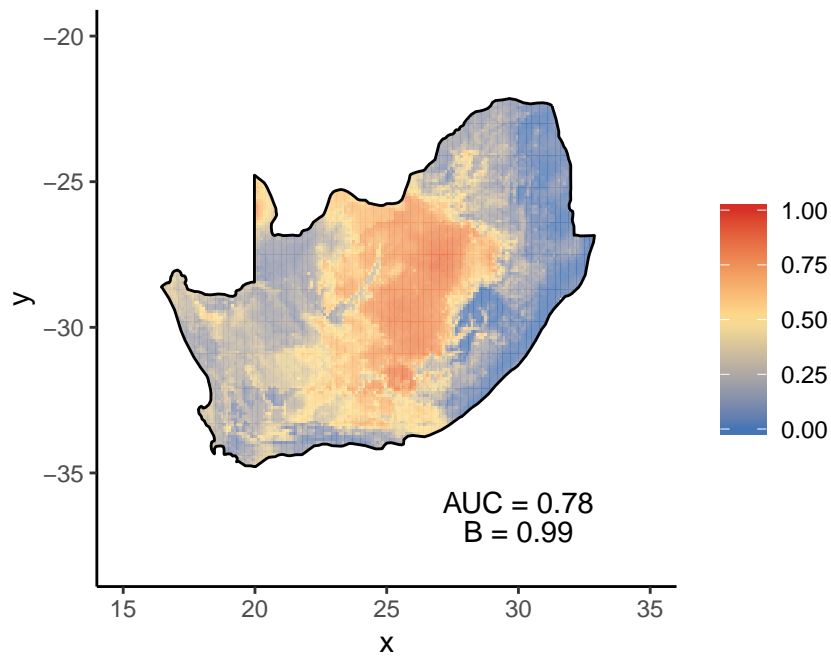

### Uncertainty

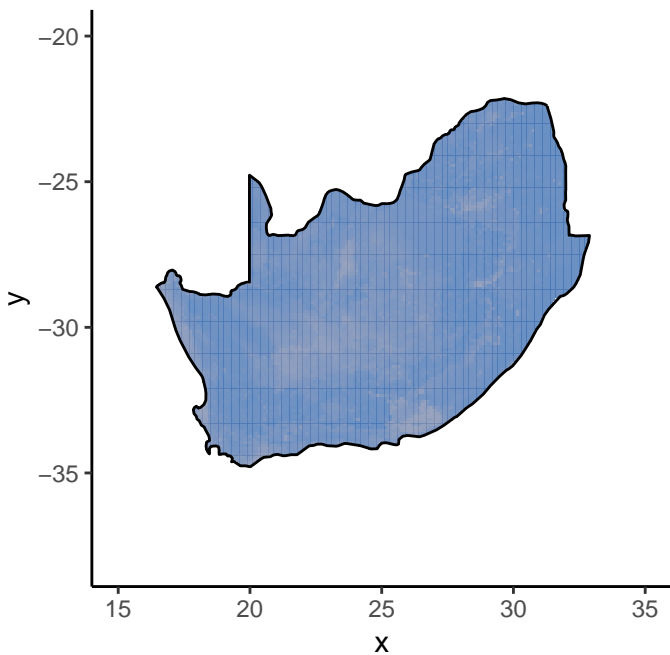

### Uncertainty

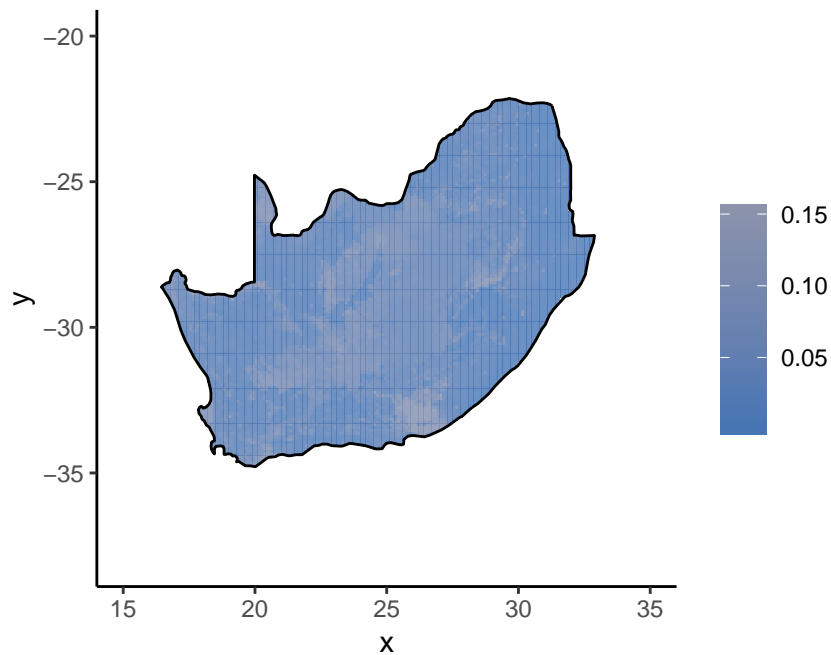

### Tsessebe (RECENT)

Dataset

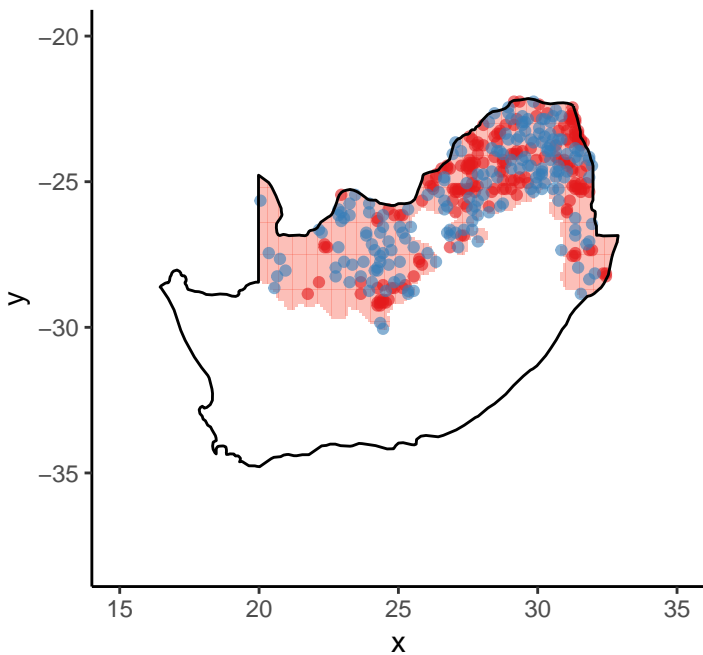

### Tsessebe (TOTAL)

Dataset

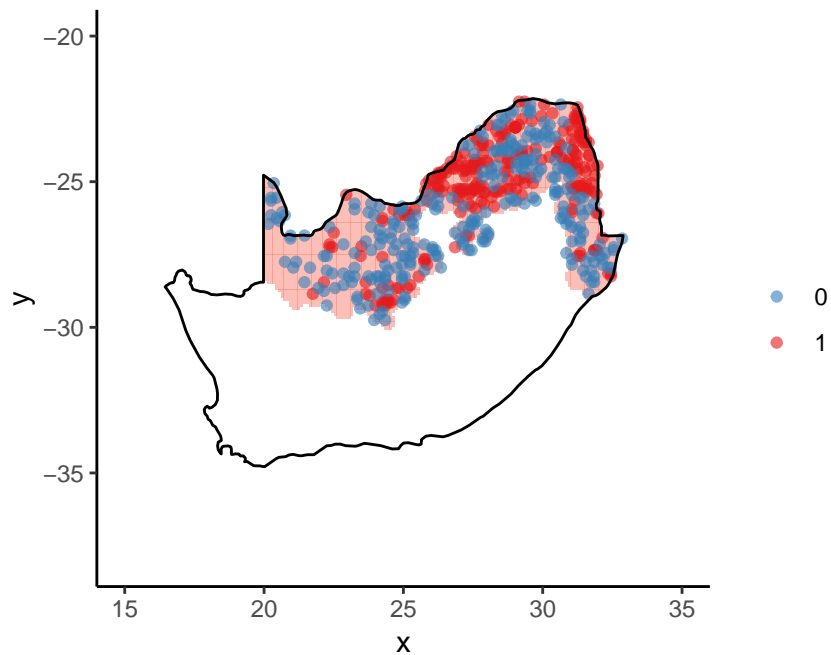

### Habitat suitability

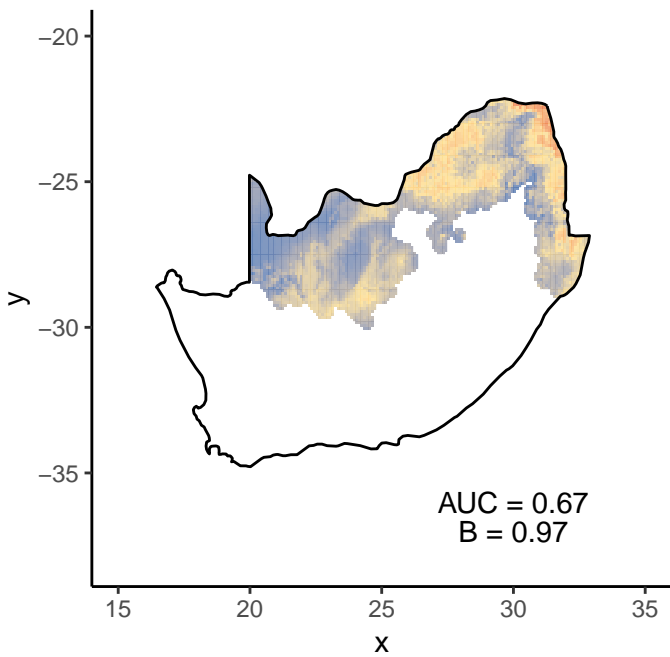

### Habitat suitability

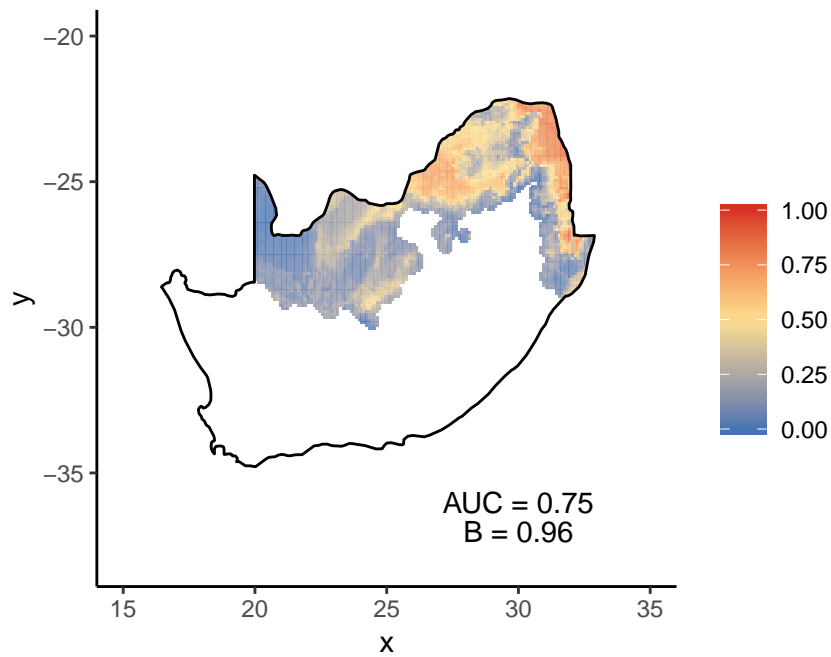

### Uncertainty

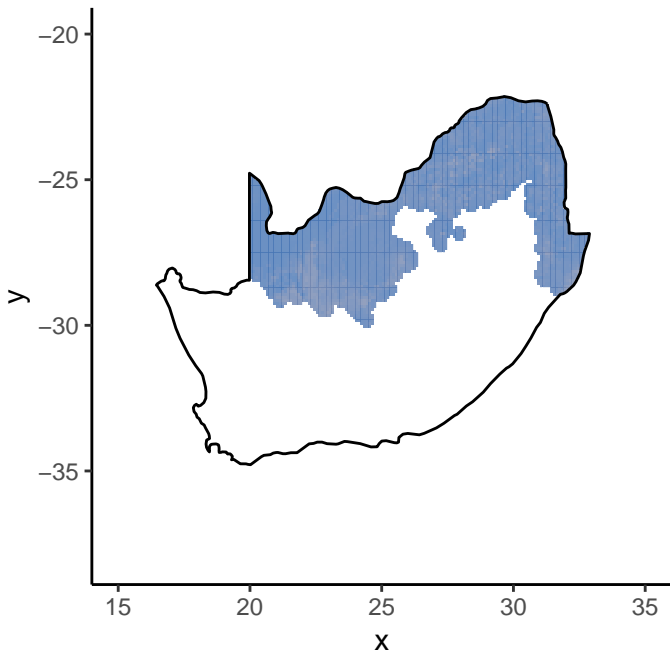

### Uncertainty

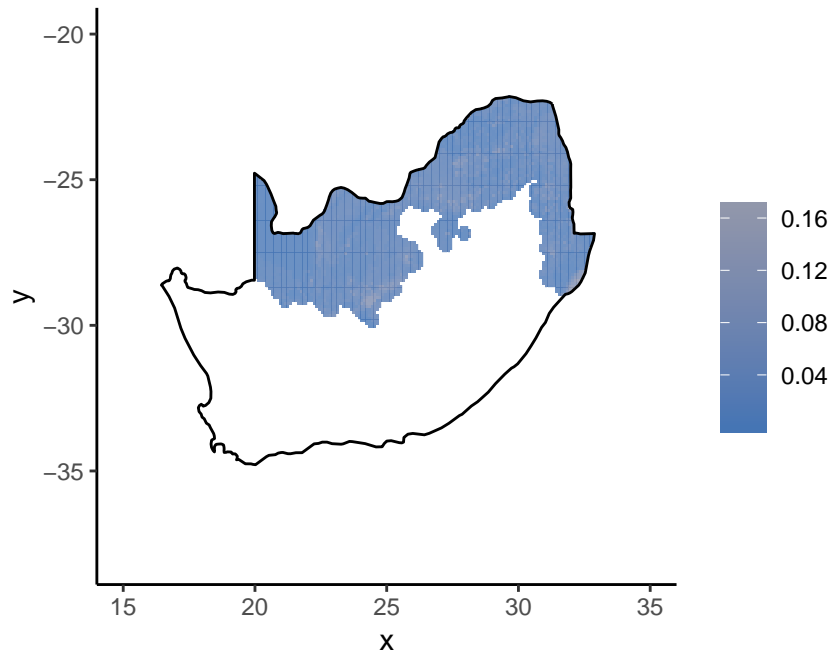

### Warthog (RECENT)

Dataset

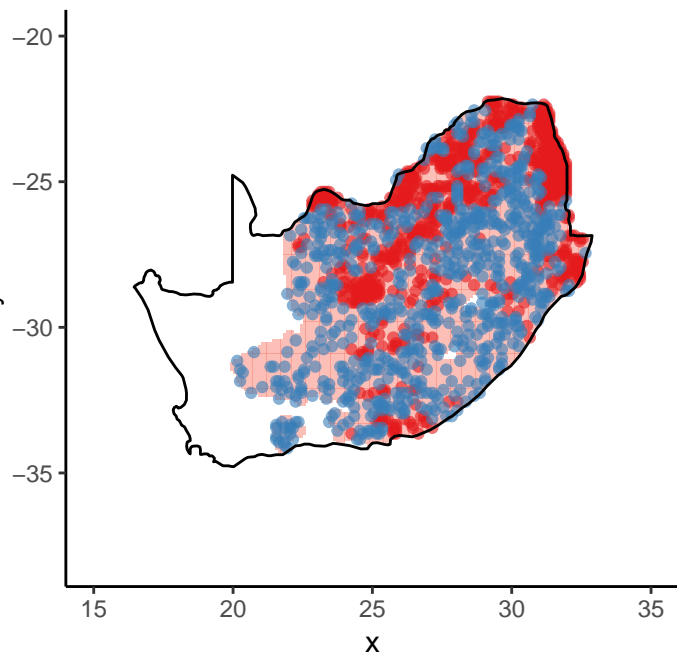

### Warthog (TOTAL)

Dataset

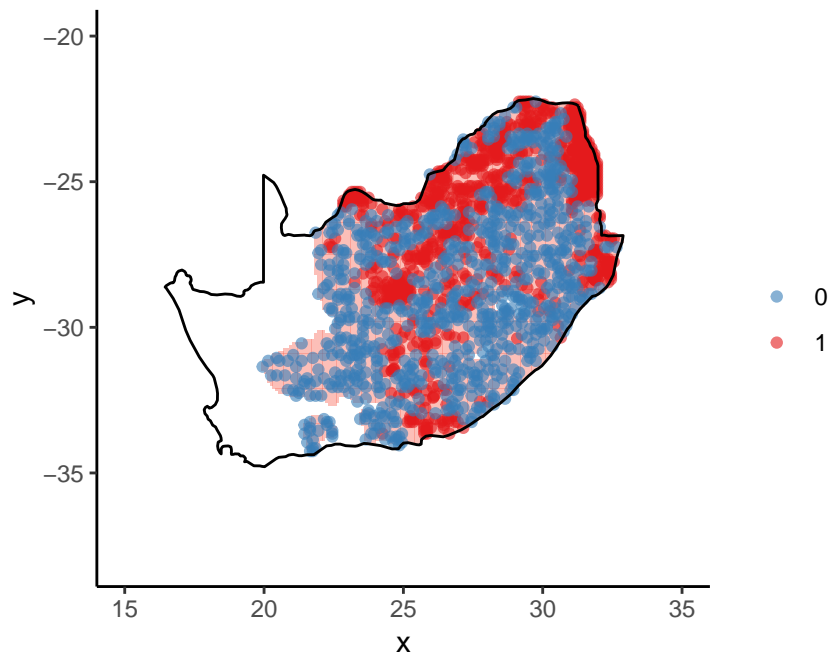

### Habitat suitability

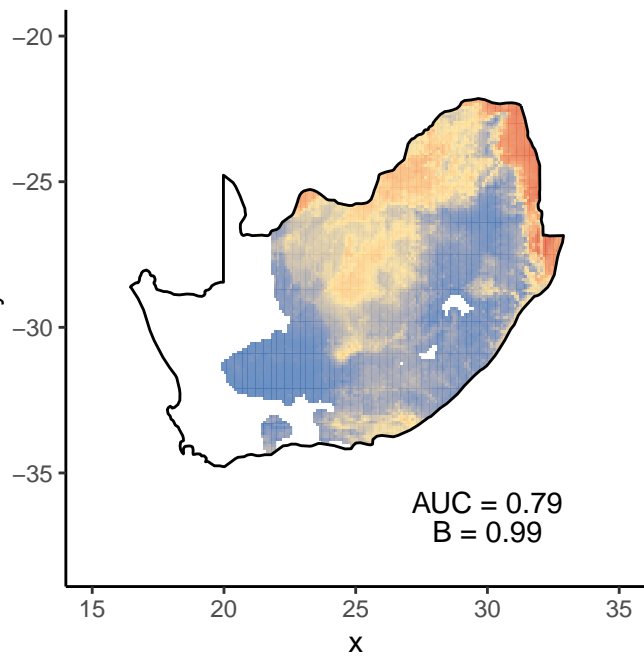

### Habitat suitability

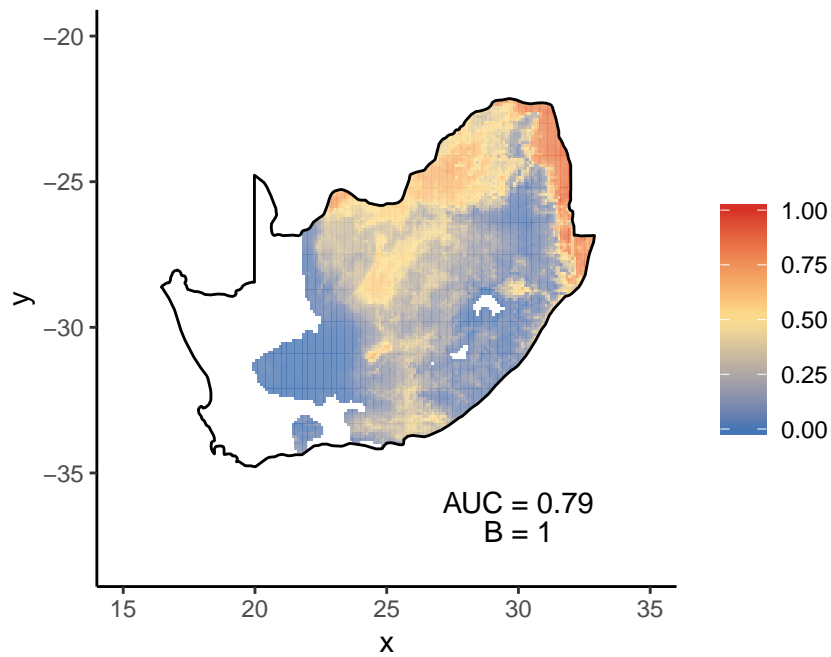

### Uncertainty

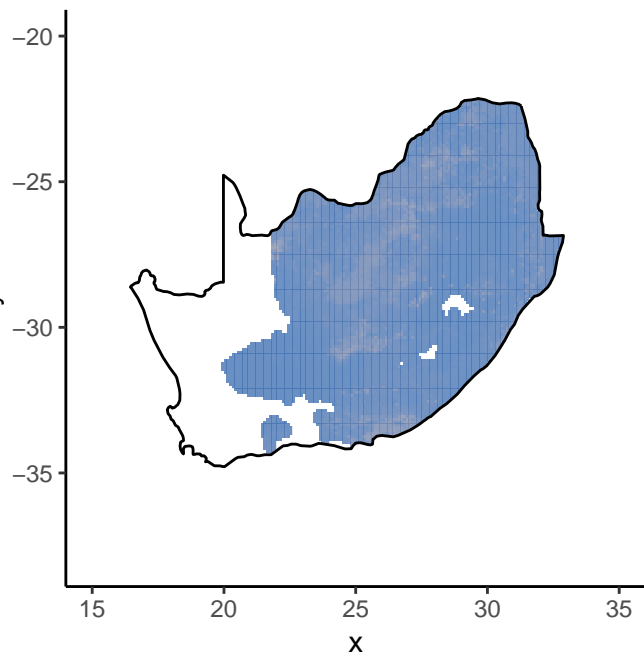

### Uncertainty

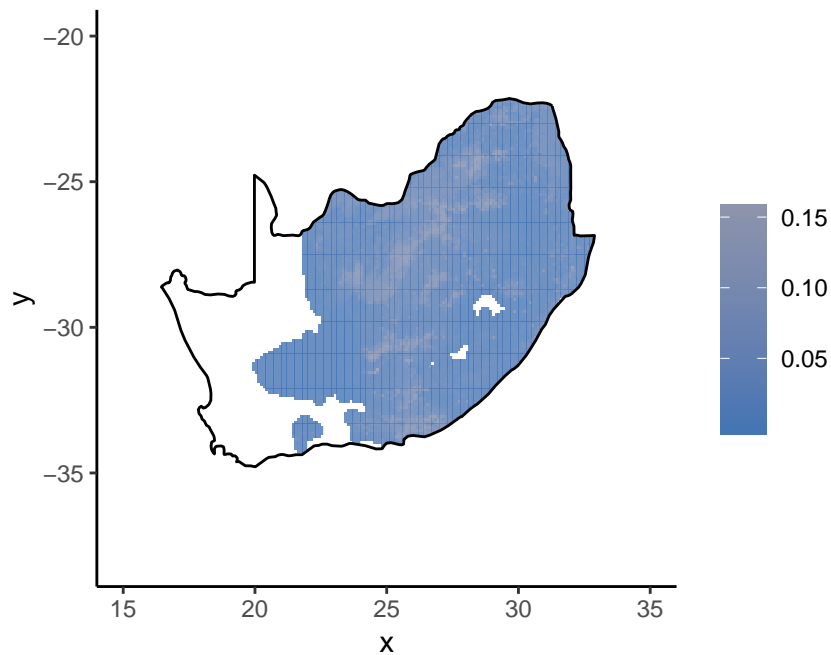

### Waterbuck (RECENT)

Dataset

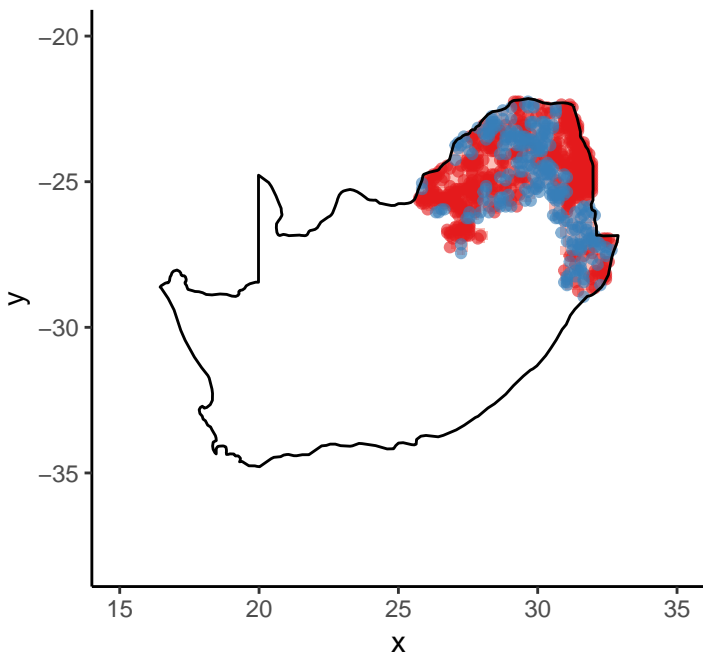

### Waterbuck (TOTAL)

Dataset

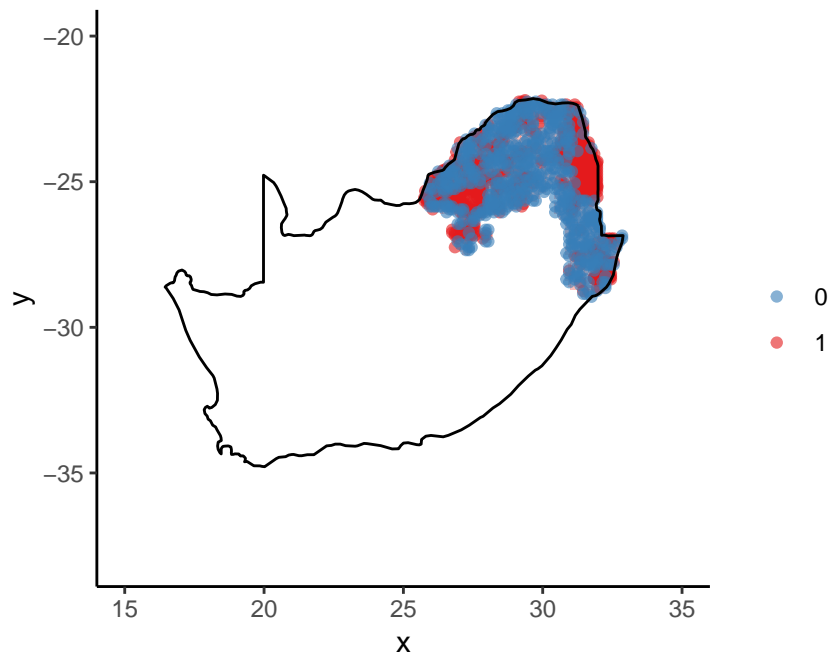

### Habitat suitability

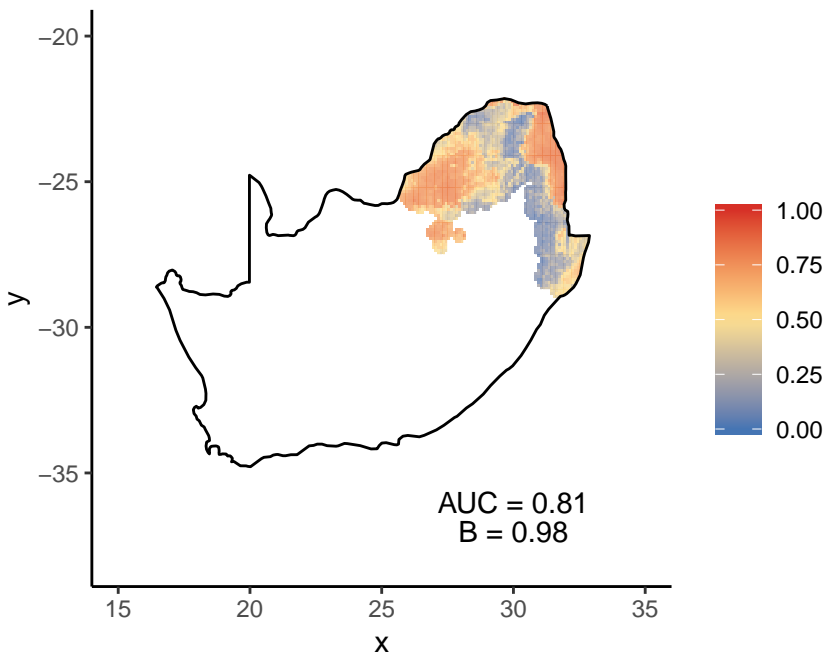

### Habitat suitability

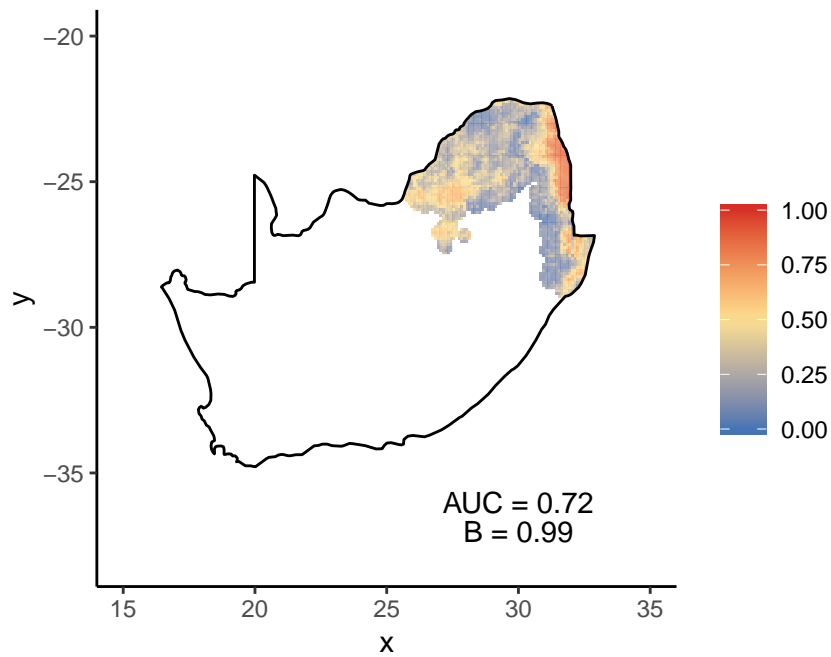

### Uncertainty

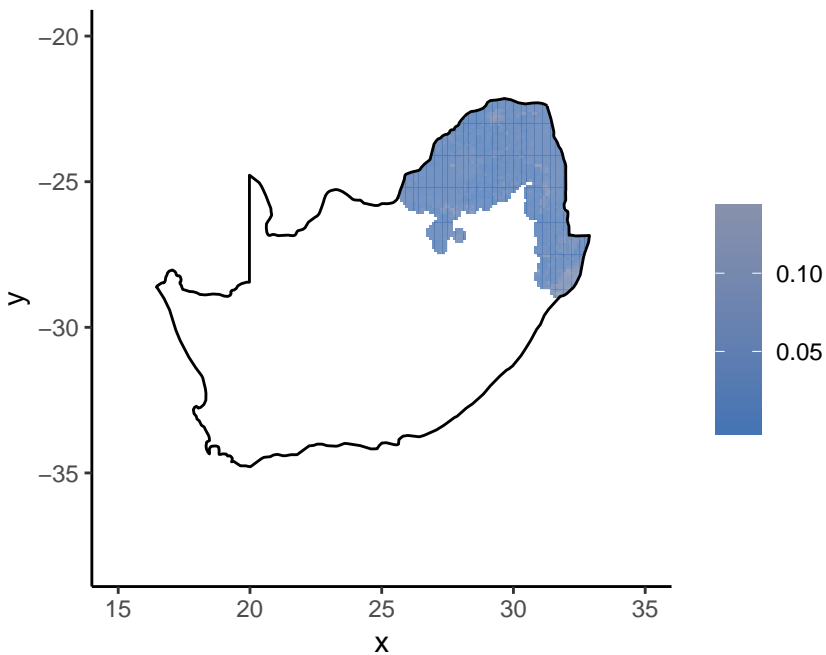

### Uncertainty

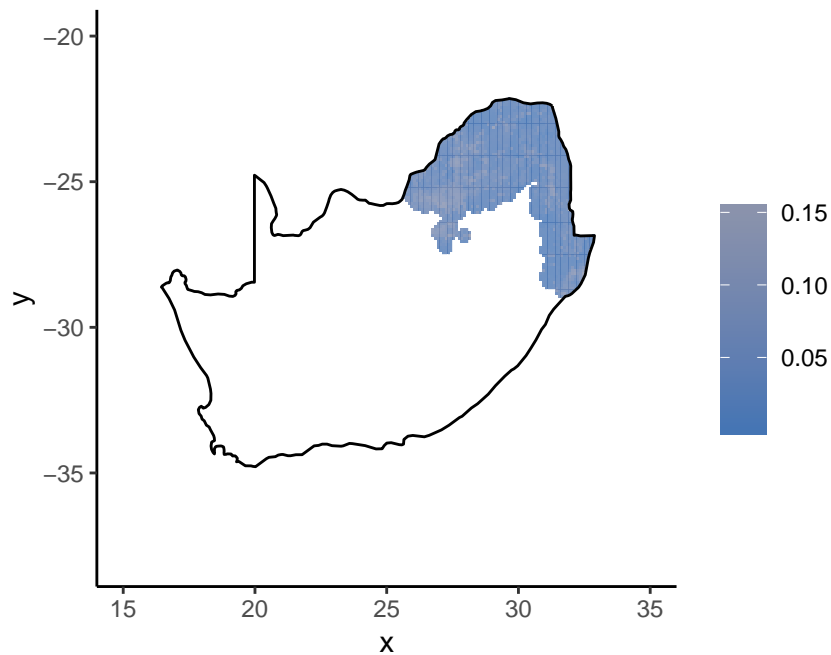

Supplement: rstb20190215supp3.pdf [file rstb20190215supp3.pdf]
